# Supplementary material
Source: publisher figshare collection journal article supplement (https://acs.figshare.com/ndownloader/files/25122288)
Supplement: Supplementary file 1 [file 25122288]

Supporting Information  
Mechanistic Studies Inform Design of Improved Ti(salen) Catalysts for  
Enantioselective [3+2] Cycloaddition  
(Experimental Part)

Sophia G. Robinson,<sup>a†</sup> Xiangyu Wu,<sup>b†</sup> Binyang Jiang,<sup>b</sup> Matthew S. Sigman,<sup>a\*</sup> Song Lin<sup>b\*</sup>

<sup>a</sup>Department of Chemistry, University of Utah, 315 South 1400 East, Salt Lake City, UT 84112, United States

<sup>b</sup>Department of Chemistry and Chemical Biology, Cornell University, Ithaca, NY 14853, United States

**Table of Contents**

|             |                                                                                                 |     |
|-------------|-------------------------------------------------------------------------------------------------|-----|
| Section 1.  | General information.....                                                                        | S2  |
| Section 2.  | General procedures for Ti-catalyzed [3+2] cycloaddition of cyclopropyl ketones and alkenes..... | S3  |
| Section 3.  | Preparation and characterization of catalysts .....                                             | S4  |
| Section 4.  | Probing the effect of ortho and para substituents.....                                          | S9  |
| Section 5.  | Characterization of products .....                                                              | S10 |
| Section 6.  | Non-linear effect study and diffusion NMR experiments.....                                      | S17 |
| Section 7.  | Electrochemical studies of catalysts .....                                                      | S20 |
| Section 8.  | Reference .....                                                                                 | S22 |
| Section 9.  | Spectra data of products .....                                                                  | S23 |
| Section 10. | HPLC traces .....                                                                               | S39 |

## **Section 1. General information**

All reactions were conducted under a nitrogen atmosphere, unless otherwise noted. Flash chromatography was performed using silica gel P60, 40 - 63  $\mu\text{m}$ , 60 Å (R12030B) from SiliCycle. Commercial reagents purchased from Alfa Aesar, Acros, AK Scientific, Combi-blocks, Oakwood, Sigma Aldrich, Strem and TCI were used as received with the following exceptions: toluene, dichloromethane, tetrahydrofuran, diethyl ether, and acetonitrile were dried by passing through columns of activated alumina; dimethylformamide was dried by passing through columns of activated molecular sieves; ethyl acetate are distilled and dried over activated molecular sieves. Manganese powder was purchased from Alfa Aesar 325 mesh, 99.95% (metals basis). Proton nuclear magnetic resonance ( $^1\text{H}$  NMR) spectra and carbon nuclear magnetic resonance ( $^{13}\text{C}$  NMR) spectra were recorded on Mercury-300 (300 MHz), Inova-400 (400 MHz) and Inova-500 (500 MHz) spectrometers. 2D NMR spectra were collected on Inova-600 (600 MHz). Chemical shifts for protons are reported in parts per million downfield from tetramethylsilane and are referenced to residual protium in the NMR solvent ( $\text{CHCl}_3 = \delta$  7.26). Chemical shifts for carbon are reported in parts per million downfield from tetramethylsilane and are referenced to the carbon resonances of the solvent ( $\text{CDCl}_3 = \delta$  77.16). Data are represented as follows: chemical shift, multiplicity (br. s = broad, s = singlet, d = doublet, t = triplet, q = quartet, m = multiplet), coupling constants in Hertz (Hz), integration. Yields and diastereomeric ratios were determined based on  $^1\text{H}$  NMR spectra of crude reaction mixture using dibromomethane as the internal standard. Infrared (IR) spectra were obtained using a Thermo Scientific Nicolet is 10 FTIR spectrometer. Cyclic voltammetry data were measured with a BASi Epsilon potentiostat. The mass spectral data were obtained on a ThermoFisher Scientific Exactive series DART Mass Spectrometer. GC-MS data was collected on J MS-GC Mate II GCMS system. Enantiomeric excesses were determined by chiral HPLC of isolated material using a SHIMADZU system with CHIRALPAK® columns

Abbreviations:  $t\text{Bu}$ —*tert*-butyl, DMAP—4-dimethylaminopyridine, DCM—dichloromethane, dr—diastereomeric ratio, ee—enantiomeric excess,  $\text{Et}_2\text{O}$ —diethyl ether,  $\text{Et}_3\text{N}$ —triethylamine, EtOAc—ethyl acetate, EtOH—ethanol, MeCN—acetonitrile, MeOH—methanol, THF—tetrahydrofuran, rt—room temperature

## **Section 2. General procedures for Ti-catalyzed [3+2] cycloaddition of cyclopropyl ketones and alkenes**

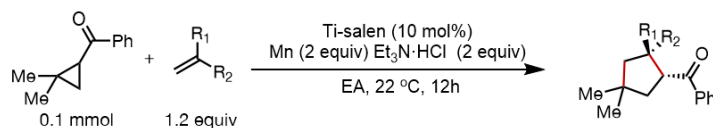

**Method A** (0.1 mmol scale): *Ti-catalyzed [3+2] cycloaddition of cyclopropyl ketones and alkenes.* In a N<sub>2</sub>-filled glovebox, an oven-dried 8 mL culture tube equipped with a magnetic stir bar was charged with Mn (11.0 mg, 0.2 mmol, 2.0 equiv), Et<sub>3</sub>N·HCl (27.4 mg, 0.2 mmol, 2.0 equiv) and Ti-salen complex (0.01 mmol, 10 mol%). The solids were suspended in 1 mL of EtOAc. The mixture was stirred for 15 min to allow reduction of the pre-catalyst. (Note: Depending on the solubility and reduction potential of each catalyst, the color change of solution from dark red to deep green could be observed for sometimes. However, the absence of color change has no effect on the success of reaction.) Subsequently, the alkene substrate (1.2 equiv) and cyclopropyl ketone substrate (0.10 mmol, 1.0 equiv) were added. The resulting mixture was capped and sealed with parafilm, then was removed from the glovebox and stirred at room temperature (22 ± 1 °C) for 12 h. The reaction mixture was then all transferred onto a short silica gel column (1-1.5 cm in length, ca. 0.5 g) and flushed through with EtOAc (10 mL in total) to remove the inorganic salts and other insoluble solids. The product solution was concentrated under vacuo and dissolved in CDCl<sub>3</sub> to analyze the NMR yields and diastereomeric ratio(dr) using <sup>1</sup>H NMR. The purified products were obtained by flash chromatography on silica gel using hexanes/EtOAc or other solvents combination. Enantiomeric excesses were determined by chiral HPLC of isolated product.

### Section 3. Preparation and characterization of catalysts

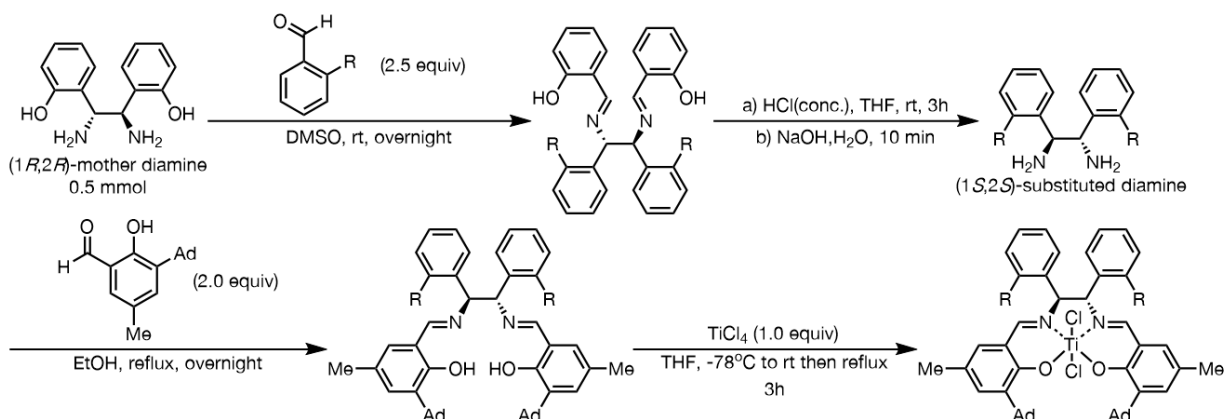

**Method B** (0.5 mmol scale): *Synthesis of Ti-salen complex with different backbone.* The substituted diamines and 3-(adamantan-1-yl)-5-methylsalicylaldehyde were synthesized according to literature with minor modification<sup>1</sup>.

**Synthesis of substituted diamine:** To a clear solution of (1R,2R)-bis(2-hydroxyphenyl)-1,2-diaminoethane (0.5 mmol, 122 mg) DMSO (2.5 mL) was added corresponding aryl aldehyde (1.25 mmol, 2.5equiv). The resulting mixture was stirred overnight at room temperature, and then the mixture was poured into water. The aqueous layer was extracted with Et<sub>2</sub>O (30 mL x3). The combined organic layer was washed with water and dried over sodium sulfate. After evaporation of the solvent, the residue was dried on a high vacuum pump. The crude product was subsequently hydrolyzed under acidic conditions. To a clear solution of crude diimine product in THF (5 mL) was added concentrated HCl (37%, 0.15 mL). The reaction mixture was stirred at room temperature for 3 h. The mixture was diluted with 1M HCl and extracted with Et<sub>2</sub>O (30 mL x2). The combined organic layer was extracted with 1M HCl (30 mL x3), and the combined aqueous layer was neutralized with NaOH to pH=12. The neutralized solution was extracted with Et<sub>2</sub>O (50 mL x3). The combined organic layer was dried over anhydrous Na<sub>2</sub>SO<sub>4</sub>, filtered and concentrated. The crude diamine was further dried on a high vacuum pump before subsequent synthesis.

**Schiff base condensation:** To an oven-dried round-bottomed flask was added diamine and the previously synthesized diamine (0.5 mmol) and 3-(adamantan-1-yl)-5-methylsalicylaldehyde (1.0 mmol, 2.0 equiv). The mixture was suspended in EtOH (5 mL) and heated up to reflux. The solution was kept under reflux condition for 12h. After cooling down, precipitate was filtered and washed with a small portion of cold EtOH. If no precipitate formed, then one drop of water was added to the solution.

**Ti-salen complex synthesis:** In an oven-dried round bottom flask, the salen ligand (358 mg, 0.5 mmol, 1 equiv) was dissolved in THF (5 mL) to afford a yellow solution, which was cooled to -78 °C under N<sub>2</sub>. Then TiCl<sub>4</sub> solution (1.0 M in toluene; 0.5 mL, 0.5 mmol, 1.0 equiv) was added carefully into the above solution at -78 °C. This red solution was warmed up to room temperature and heated under reflux for 3 h. After the reaction was cooled to room temperature, the dark red solid was filtered off and washed with hexanes and Et<sub>2</sub>O to afford catalyst. If no solid formed after reaction, the solvent was removed under vacuum. Pentane or hexanes was added to the dark red residue and sonication was applied to facilitate the formation of precipitate.



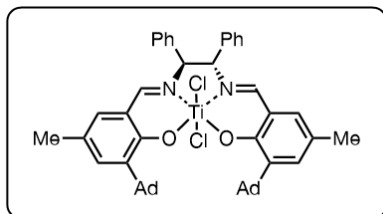

Catalyst **(*S,S*)-4a**. Followed General Method B, the crude solid was washed with hexanes and Et<sub>2</sub>O to afford catalyst **(*S,S*)-4a** as a dark red powder. <sup>1</sup>H NMR (500 MHz, CDCl<sub>3</sub>) δ 7.82 (s, 2H), 7.33 (d, *J* = 2.2 Hz, 2H), 7.31 – 7.27 (m, 6H), 7.15 – 7.08 (m, 4H), 6.80 (d, *J* = 2.2 Hz, 2H), 5.55 (s, 2H), 2.27 – 2.23 (m, 12H), 2.22 (s, 7H), 2.15 – 2.09 (m, 5H), 1.86 – 1.79 (m, 6H), 1.79 – 1.72 (m, 6H). <sup>13</sup>C NMR (126 MHz, CDCl<sub>3</sub>) δ 164.97, 160.98, 137.76, 136.31, 136.13, 133.88, 131.50, 129.39, 129.11, 126.40, 41.82, 37.96, 37.08, 29.06, 20.63.

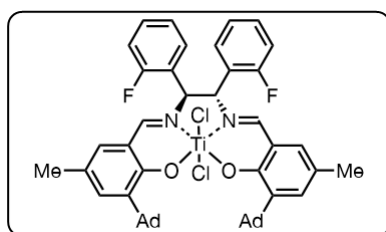

Catalyst **(*S,S*)-4b**. Followed General Method B, the crude solid was washed with hexanes and Et<sub>2</sub>O to afford catalyst **(*S,S*)-4b** as a light red powder. <sup>1</sup>H NMR (500 MHz, CDCl<sub>3</sub>) δ 7.80 (s, 2H), 7.34 (d, *J* = 2.2 Hz, 2H), 7.33 – 7.29 (m, 4H), 7.20 – 7.11 (m, 2H), 7.02 – 6.93 (m, 2H), 6.85 (d, *J* = 2.2 Hz, 2H), 6.02 (s, 2H), 2.30 – 2.19 (m, 18H), 2.15 – 2.09 (m, 6H), 1.86 – 1.79 (m, 6H), 1.79 – 1.71 (m, 6H). <sup>13</sup>C NMR (126 MHz, CDCl<sub>3</sub>) δ 164.40, 161.15, 137.81, 136.24, 133.94, 131.47, 126.30, 125.43, 116.05, 41.84, 37.99, 37.10, 29.07, 20.64. <sup>19</sup>F NMR (376 MHz, CDCl<sub>3</sub>) δ -97.87.

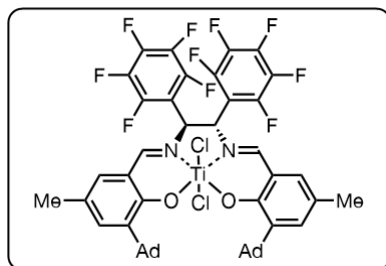

Catalyst **(*S,S*)-4aa**. Followed General Method B, the crude solid was washed with hexanes and Et<sub>2</sub>O to afford catalyst **(*S,S*)-4aa** as a light red powder. <sup>1</sup>H NMR (500 MHz, CDCl<sub>3</sub>) δ 7.74 (s, 2H), 7.41 (s, 2H), 6.96 (s, 2H), 6.39 (s, 2H), 2.29 (s, 6H), 2.26 – 2.19 (m, 12H), 2.15 – 2.07 (m, 6H), 1.84 – 1.78 (m, 6H), 1.78 – 1.71 (m, 6H). <sup>13</sup>C NMR (126 MHz, CDCl<sub>3</sub>) δ 163.05, 161.33, 138.16, 137.30, 134.28, 131.98, 125.84, 63.17, 41.81, 38.06, 37.02, 29.01, 20.67. <sup>19</sup>F NMR (470 MHz, CDCl<sub>3</sub>) δ -133.89, -139.44, -146.89, -146.93, -146.97, -157.42.

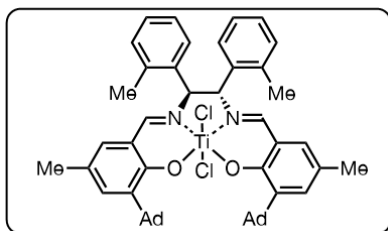

Catalyst **(S,S)-4c**. Followed General Method B, the crude solid was washed with hexanes and Et<sub>2</sub>O to afford catalyst **(S,S)-4c** as a dark red powder. <sup>1</sup>H NMR δ 7.70 (s, 2H), 7.42 (dd, *J* = 7.8, 1.5 Hz, 2H), 7.32 (d, *J* = 2.2 Hz, 3H), 7.25 – 7.12 (m, 4H), 7.04 (d, *J* = 7.4 Hz, 2H), 6.79 (d, *J* = 2.2 Hz, 3H), 5.91 (s, 2H), 2.26 – 2.24 (m, 12H), 2.22 (s, 6H), 2.15 – 2.09 (m, 6H), 1.89 (s, 6H), 1.86 – 1.80 (m, 6H), 1.79 – 1.72 (m, 6H). <sup>13</sup>C NMR (126 MHz, CDCl<sub>3</sub>) δ 164.66, 160.93, 138.95, 137.70, 135.94, 135.02, 133.83, 131.37, 130.69, 129.18, 128.90, 127.38, 126.52, 72.05, 41.81, 37.94, 37.10, 29.06, 20.63, 19.30.

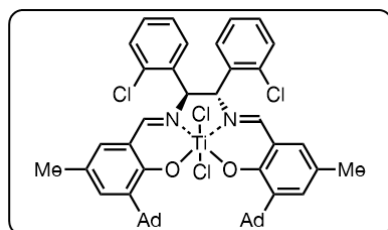

Catalyst **(S,S)-4d**. Followed General Method B, the crude solid was washed with hexanes and Et<sub>2</sub>O to afford catalyst **(S,S)-4d** as a dark red powder. <sup>1</sup>H NMR (500 MHz, CDCl<sub>3</sub>) δ 7.64 (s, 2H), 7.58 (d, *J* = 7.4 Hz, 2H), 7.38 – 7.31 (m, 4H), 7.28 (M, 4H), 6.83 (d, *J* = 2.2 Hz, 2H), 6.30 (s, 2H), 2.28 – 2.20 (m, 18H), 2.14 – 2.09 (m, 6H), 1.85 – 1.79 (m, 6H), 1.78 – 1.71 (m, 6H). <sup>13</sup>C NMR (126 MHz, CDCl<sub>3</sub>) δ 164.48, 161.08, 137.75, 136.30, 136.18, 133.93, 133.36, 131.47, 130.99, 130.63, 129.81, 128.28, 126.37, 71.16, 41.80, 37.95, 37.08, 29.04, 20.64.

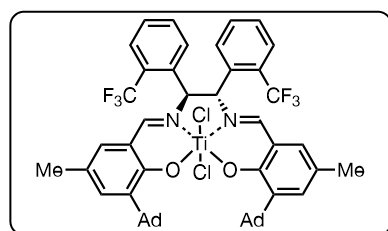

Catalyst **(S,S)-1e**. Followed General Method B, the crude solid was washed with hexanes and Et<sub>2</sub>O to afford catalyst **(S,S)-1e** as a dark red powder. <sup>1</sup>H NMR δ 7.82 – 7.75 (m, 2H), 7.65 – 7.58 (m, 4H), 7.51 (s, 2H), 7.48 – 7.41 (m, 2H), 7.33 (d, *J* = 2.2 Hz, 2H), 6.74 (d, *J* = 2.2 Hz, 2H), 6.23 (s, 2H), 2.26 – 2.18 (m, 18H), 2.11 (s, 6H), 1.85 – 1.78 (m, 6H), 1.78 – 1.71 (m, 6H). <sup>13</sup>C NMR (126 MHz, CDCl<sub>3</sub>) δ 165.56, 160.95, 137.79, 136.41, 134.66, 134.01, 133.45, 132.00, 131.54, 129.62, 126.39, 126.13, 71.31, 41.80, 37.96, 37.06, 29.04, 20.61. <sup>19</sup>F NMR (470 MHz, CDCl<sub>3</sub>) δ -58.12.

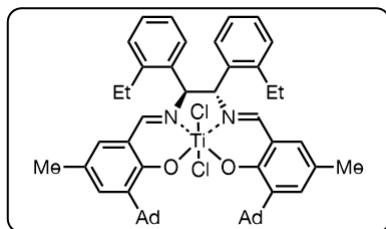

Catalyst **(S,S)-4f**. Followed General Method B, the crude solid was washed with hexanes and Et<sub>2</sub>O to afford catalyst **(S,S)-4f** as a red powder. <sup>1</sup>H NMR δ 7.65 (s, 2H), 7.43 – 7.39 (m, 2H), 7.33 – 7.29 (m, 2H), 7.25 – 7.22 (m, 4H), 7.12 – 7.06 (m, 2H), 6.77 (d, *J* = 2.2 Hz, 2H), 6.00 (s, 2H), 2.44 (dq, *J* = 15.0, 7.5 Hz, 2H), 2.27 – 2.23 (m, 12H), 2.22 (s, 6H), 2.20 – 2.15 (m, 1H), 2.11 (s, 6H), 1.85 – 1.79 (m, 6H), 1.78 – 1.70 (m, 6H), 0.95 (t, *J* = 7.5 Hz, 6H). <sup>13</sup>C NMR (126 MHz, CDCl<sub>3</sub>) δ 164.45, 160.91, 144.97, 137.69, 135.90, 134.05, 133.80, 131.35, 129.16, 129.14, 129.02, 127.35, 126.51, 71.52, 41.80, 37.94, 37.09, 29.06, 25.41, 20.62, 15.20.

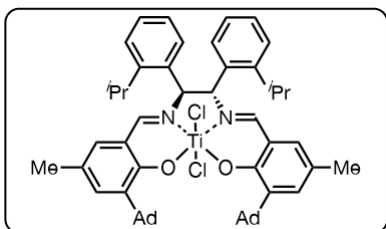

Catalyst **(S,S)-4g**. Followed General Method B, the crude solid was washed with hexanes and Et<sub>2</sub>O to afford catalyst **(S,S)-4g** as a red powder. <sup>1</sup>H NMR δ 7.68 (s, 2H), 7.46 – 7.41 (m, 2H), 7.34 – 7.30 (m, 2H), 7.26 – 7.14 (m, 7H), 6.78 – 6.72 (m, 2H), 6.06 (s, 2H), 2.77 (hept, *J* = 6.8 Hz, 2H), 2.27 – 2.23 (m, 12H), 2.22 (s, 6H), 2.15 – 2.08 (m, 6H), 1.87 – 1.79 (m, 6H), 1.79 – 1.72 (m, 6H), 1.09 (d, *J* = 6.8 Hz, 6H), 0.55 (d, *J* = 6.7 Hz, 6H). <sup>13</sup>C NMR (126 MHz, CDCl<sub>3</sub>) δ 164.74, 160.85, 149.76, 137.70, 135.95, 133.77, 133.57, 131.40, 129.22, 127.28, 126.56, 125.80, 71.59, 41.81, 37.94, 37.09, 29.05, 28.57, 25.49, 22.77, 20.62.

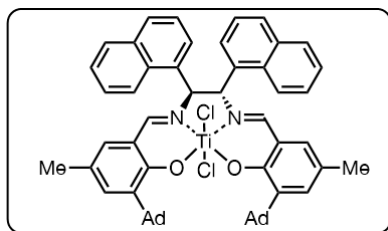

Catalyst **(S,S)-4h**. Followed General Method B, the crude solid was washed with hexanes and Et<sub>2</sub>O to afford catalyst **(S,S)-4h** as a red powder. The catalyst shows 3 different distereomers in a ratio of 4:3:2, in which two are *C*<sub>2</sub>-symmetric and one is not *C*<sub>2</sub>-symmetric. <sup>1</sup>H NMR (500 MHz, CDCl<sub>3</sub>) δ 11.64 (s, free phenol), 9.82 (s, free phenol), 8.63 (d, *J* = 8.6 Hz, 0H), 8.49 (d, *J* = 8.6 Hz, 1H), 8.04 (d, *J* = 8.5 Hz, 0H), 7.97 (d, *J* = 2.2 Hz, 0H), 7.93 (s, 1H), 7.88 – 7.83 (m, 1H), 7.78 (d, *J* = 1.9 Hz, 1H), 7.77 – 7.74 (m, 1H), 7.73 (s, 0H), 7.73 – 7.68 (m, 1H), 7.68 – 7.62 (m, 2H), 7.62 – 7.56 (m, 1H), 7.56 – 7.43 (m, 3H), 7.34 – 7.29 (m, 2H), 7.18 (q, *J* = 6.2, 4.6 Hz, 1H), 7.02 – 6.97 (m, 0H), 6.96 (s, 0H), 6.93 (t, *J* = 5.8 Hz, 1H), 6.90 (s, 0H), 6.89 – 6.83 (m, 1H), 6.77 (ddd, *J* = 8.6, 6.8, 1.4 Hz, 0H), 6.67 (d, *J* = 2.2 Hz, 0H), 6.63 (d, *J* = 2.2 Hz, 0H), 6.59 (d, *J* = 2.2 Hz, 1H),

6.52 (s, 1H), 6.49 (dd,  $J = 7.0, 1.2$  Hz, 1H), 6.11 (dd,  $J = 11.5, 2.2$  Hz, 1H), 2.34 – 2.22 (m, 13H), 2.19 – 2.11 (m, 14H), 1.90 – 1.74 (m, 15H).  $^{13}\text{C}$  NMR (126 MHz,  $\text{CDCl}_3$ )  $\delta$  166.13, 164.74, 164.43, 161.23, 161.08, 160.91, 137.82, 137.76, 137.67, 137.57, 136.21, 136.16, 136.12, 135.88, 135.61, 134.54, 134.50, 133.91, 133.81, 133.59, 133.17, 132.96, 132.90, 132.43, 131.47, 131.37, 131.33, 131.14, 130.47, 130.43, 130.28, 129.81, 129.61, 129.57, 129.47, 129.37, 129.18, 129.07, 128.48, 128.37, 127.97, 127.79, 127.71, 127.26, 126.85, 126.70, 126.48, 126.44, 126.40, 126.19, 126.02, 125.89, 125.72, 125.44, 125.23, 124.82, 124.72, 122.35, 121.66, 80.95, 76.49, 69.61, 67.68, 41.90, 41.87, 41.83, 41.79, 40.32, 38.00, 37.12, 29.10, 29.08, 20.55.

## Section 4. Probing the effect of ortho and para substituents

Followed General Method A using Ti-salen complex with different ortho/para substituents and *p*-methoxystyrene as alkene, the crude of reaction mixture was analyzed by NMR. Enantio excess(ee) was analyzed by HPLC after purification. All results were obtained with two parallel experiments. The preliminary results suggested modifications at these positions are not effective for improving the catalyst performance.

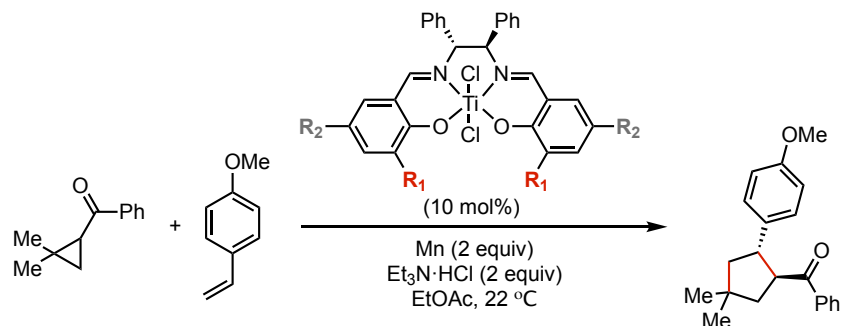

|                        |                  | <i>para</i> ( $R_2$ ) |                    |                     |                    |                    |                    |
|------------------------|------------------|-----------------------|--------------------|---------------------|--------------------|--------------------|--------------------|
|                        |                  | Cl                    | F                  | H                   | Me                 | <i>t</i> -Bu       | OMe                |
| <i>ortho</i> ( $R_1$ ) | H                | -<br>-                | -<br>-             | dr 1:1.5<br>2% ee   | dr 1:1.4<br>1% ee  | dr 1:1.5<br>1% ee  | -<br>-             |
|                        | Me               | -<br>-                | -<br>-             | dr 1:1.6<br>-16% ee | dr 1:1.7<br>-3% ee | -<br>-             | -<br>-             |
|                        | Ph               | dr 1:2.1<br>1% ee     | dr 1:2.2<br>2% ee  | dr 1:2<br>1% ee     | dr 1:2.3<br>3% ee  | dr 1:2.2<br>6% ee  | dr 1:2.1<br>6% ee  |
|                        | <i>t</i> -Bu     | dr 1.8:1<br>48-63% ee | dr 1.6:1<br>45% ee | dr 2.2:1<br>84% ee  | dr 2.1:1<br>74% ee | dr 2.1:1<br>78% ee | dr 1.9:1<br>76% ee |
|                        | Ad               | dr >19:1<br>94% ee    | dr >19:1<br>90% ee | dr >19:1<br>93% ee  | dr >19:1<br>94% ee | dr >19:1<br>92% ee | dr >19:1<br>93% ee |
|                        | CEt <sub>3</sub> | -<br>-                | -<br>-             | dr 1.3:1<br>83% ee  | -<br>-             | -<br>-             | -<br>-             |

## Section 5. Characterization of products

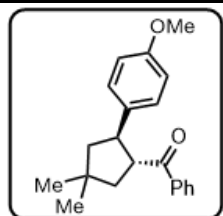

### **((1R,2R)-2-(4-methoxyphenyl)-4,4-dimethylcyclopentyl)(phenyl)methanone ((R,R)-3a).**

Followed General Method A with Ti-salen complex (**(S,S)-4e**) and corresponding alkene, the crude product was purified by column chromatography (1:19, EtOAc/hexanes) to give 16.0 mg (52% yield) of **(R,R)-3a** as a yellow solid. The dr was determined to be 17:1, trans diastereoisomer: -94% ee [AS, 2.5% <sup>i</sup>PrOH in hexanes, 0.4 mL/min, 254 nm; t<sub>1</sub> = 12.61 min, t<sub>2</sub> = 13.40 min]. Followed General Method A with Ti-salen complex (**(S,S)-4a**) and corresponding alkene, the yield was determined to be 69%, dr was determined to be >19:1, trans diastereoisomer: -90% ee [AS, 2.5% <sup>i</sup>PrOH in hexanes, 0.4 mL/min, 254 nm; t<sub>1</sub> = 12.65 min, t<sub>2</sub> = 13.43 min]. The spectra data is consistent with previous literature report, the product was isolated together with around 3% cis diastereoisomer. <sup>1</sup>H NMR (500 MHz, CDCl<sub>3</sub>) δ 7.88 – 7.79 (m, 2H), 7.56 (d, J = 7.7 Hz, cis diastereoisomer), 7.54 – 7.45 (m, 1H), 7.43 – 7.34 (m, 2H), 7.18 (d, J = 8.4 Hz, 2H), 6.86 (d, J = 8.5 Hz, cis diastereoisomer), 6.78 (d, J = 8.6 Hz, 1H), 6.53 (d, J = 8.5 Hz, cis diastereoisomer), 4.32 (q, J = 9.1 Hz, cis diastereoisomer), 3.90 (td, J = 8.5, 7.7, 4.4 Hz, 2H), 3.74 (s, 3H), 3.65 (s, cis diastereoisomer), 2.10 (dd, J = 12.8, 7.3 Hz, 1H), 2.01 (dd, J = 12.7, 6.5 Hz, 1H), 1.83 (dd, J = 12.8, 6.5 Hz, 1H), 1.72 (dd, J = 12.8, 7.3 Hz, 1H), 1.21 (s, 3H), 1.13 (s, 3H). <sup>13</sup>C NMR (126 MHz, CDCl<sub>3</sub>) δ 202.05, 158.07, 137.21, 136.22, 132.89, 132.15(cis diastereoisomer), 129.53(cis diastereoisomer), 128.55, 128.54, 128.40, 128.11(cis diastereoisomer), 128.08(cis diastereoisomer), 113.89, 113.27(cis diastereoisomer), 55.36, 55.20, 49.66, 46.85, 46.27, 38.98, 30.78, 29.74. The absolute configuration is assigned according to previous literature report<sup>2</sup>.

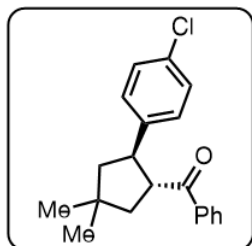

### **((1R,2R)-2-(4-chlorophenyl)-4,4-dimethylcyclopentyl)(phenyl)methanone ((R,R)-3b).**

Followed General Method A with Ti-salen complex (**(S,S)-1e**) and corresponding alkene, the crude product was purified by column chromatography (3:97, EtOAc/hexanes) to give 22.7 mg (73% yield) of **(R,R)-3b** as a white solid. The dr was determined to be 12:1, trans diastereoisomer: -94% ee [AD, 0.5% <sup>i</sup>PrOH in hexanes, 1.0 mL/min, 254 nm; t<sub>1</sub> = 7.78 min, t<sub>2</sub> = 15.27 min]. [ $\alpha$ ]<sub>D</sub><sup>22</sup> -60.0 (c0.46, CHCl<sub>3</sub>). Followed General Method A with Ti-salen complex (**(S,S)-4a**) and corresponding alkene, the yield was determined to be 93%, dr was determined to be 14:1, trans diastereoisomer: -90% ee [AD, 0.5% <sup>i</sup>PrOH in hexanes, 1.0 mL/min, 254 nm; t<sub>1</sub> = 7.52 min, t<sub>2</sub> = 14.07 min]. The spectra data is consistent with previous literature report, the product was isolated together with around 4% cis diastereoisomer. <sup>1</sup>H NMR (500 MHz, CDCl<sub>3</sub>) δ 7.86 – 7.80 (m, 2H), 7.58 – 7.55 (m, cis diastereoisomer), 7.51 (t, J = 7.6 Hz, 1H), 7.40 (t, J = 7.7 Hz, 2H), 7.19 (s, 4H), 6.95 (d, J = 8.5 Hz, cis diastereoisomer), 6.88 (d, J = 8.5 Hz, cis diastereoisomer), 4.38 – 4.32 (ddd, cis diastereoisomer, the coupling constant is hard to be resolved), 3.95 (ddd, J = 11.4, 9.8, 7.3 Hz, 1H),

3.87 (td,  $J$  = 9.8, 8.1 Hz, 1H), 3.77 (td,  $J$  = 10.5, 7.7 Hz, cis diastereoisomer), 2.33 – 2.26 (m, cis diastereoisomer), 2.13 (dd,  $J$  = 13.0, 9.8 Hz, 1H), 2.02 (dd,  $J$  = 12.7, 7.3 Hz, 1H), 1.96 – 1.91 (m, cis diastereoisomer), 1.81 (t,  $J$  = 12.1 Hz, 1H), 1.72 (dd,  $J$  = 12.9, 8.1 Hz, 1H), 1.22 (s, 3H), 1.18 (s, cis diastereoisomer), 1.13 (s, 3H).  $^{13}\text{C}$  NMR (126 MHz,  $\text{CDCl}_3$ )  $\delta$  202.11(cis diastereoisomer), 201.54, 142.65, 137.00, 133.08, 132.45(cis diastereoisomer), 131.91, 129.88(cis diastereoisomer), 128.88, 128.65, 128.59, 128.52(cis diastereoisomer), 128.24(cis diastereoisomer), 128.06(cis diastereoisomer), 127.93, 55.06, 50.92(cis diastereoisomer), 49.38, 48.95(cis diastereoisomer), 47.90(cis diastereoisomer), 46.86, 46.18, 43.44(cis diastereoisomer), 39.09, 38.67(cis diastereoisomer), 30.71, 29.68, 29.52(cis diastereoisomer), 28.64(cis diastereoisomer). The absolute configuration is assigned according to previous literature report<sup>2</sup>.

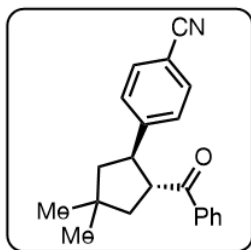

**4-((1R,2R)-2-benzoyl-4,4-dimethylcyclopentyl)benzonitrile ((R,R)-3d).** Followed General Method A with Ti-salen complex (**(S,S)-4e**) and corresponding alkene, the crude product was purified by column chromatography (1:9, EtOAc/hexanes) to give 25.2 mg (83% yield) of **(R,R)-3d** as a white solid. The dr was determined to be >19:1, trans diastereoisomer: 99% ee [AD, 5.0%  $^i\text{PrOH}$  in hexanes, 1.0 mL/min, 254 nm;  $t_1$  = 6.36 min,  $t_2$  = 9.78 min].  $[\alpha]_{\text{D}}^{22}$  -60.3 (c0.47,  $\text{CHCl}_3$ ). Followed General Method A with Ti-salen complex (**(S,S)-4a**) and corresponding alkene, the yield was determined to be 87%, dr was determined to be >19:1, trans diastereoisomer: 79% ee [AD, 5.0%  $^i\text{PrOH}$  in hexanes, 1.0 mL/min, 254 nm;  $t_1$  = 6.39 min,  $t_2$  = 9.83 min]. The spectra data is consistent with previous literature report.  $^1\text{H}$  NMR (500 MHz,  $\text{CDCl}_3$ )  $\delta$  7.84 (d,  $J$  = 7.7 Hz, 2H), 7.52 (d,  $J$  = 7.9 Hz, 3H), 7.41 (t,  $J$  = 7.6 Hz, 2H), 7.36 (d,  $J$  = 8.1 Hz, 2H), 4.08 – 4.00 (m, 1H), 3.89 (q,  $J$  = 9.5 Hz, 1H), 2.17 (dd,  $J$  = 13.1, 10.1 Hz, 1H), 2.05 (dd,  $J$  = 12.7, 7.5 Hz, 1H), 1.83 (t,  $J$  = 12.2 Hz, 1H), 1.73 (dd,  $J$  = 13.1, 8.3 Hz, 1H), 1.23 (s, 3H), 1.13 (s, 3H).  $^{13}\text{C}$  NMR (126 MHz,  $\text{CDCl}_3$ )  $\delta$  200.96, 149.90, 136.68, 133.29, 132.35, 128.74, 128.52, 128.38, 119.12, 110.12, 54.89, 49.01, 46.83, 46.53, 39.24, 30.61, 29.83, 29.59. The absolute configuration is assigned according to previous literature report<sup>2</sup>.

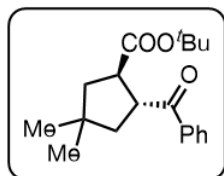

**tert-butyl (1R,2R)-2-benzoyl-4,4-dimethylcyclopentane-1-carboxylate ((R,R)-3e).** Followed General Method A with Ti-salen complex (**(S,S)-4e**) and corresponding alkene, the crude product was purified by column chromatography (1:19, EtOAc/hexanes) to give 27.7 mg (92% yield) of **(R,R)-3e** as a yellow oil. The dr was determined to be 19:1, trans diastereoisomer: 83% ee [IA, 0.5%  $^i\text{PrOH}$  in hexanes, 1.0 mL/min, 254 nm;  $t_1$  = 8.68 min,  $t_2$  = 9.60 min].  $[\alpha]_{\text{D}}^{22}$  -30.7 (c0.55,  $\text{CHCl}_3$ ). Followed General Method A with Ti-salen complex (**(S,S)-4a**) and corresponding alkene, the yield was determined to be 93%, dr was determined to be >19:1, trans diastereoisomer: 43% ee. [IA, 0.5%  $^i\text{PrOH}$  in hexanes, 1.0 mL/min, 254 nm;  $t_1$  = 8.15 min,  $t_2$  = 9.06 min]. The spectra

data is consistent with previous literature report.  $^1\text{H}$  NMR (500 MHz,  $\text{CDCl}_3$ )  $\delta$  8.00 – 7.94 (m, 2H), 7.57 – 7.51 (m, 1H), 7.45 (m, 2H), 4.22 (q,  $J$  = 8.9 Hz, 1H), 3.54 (q,  $J$  = 8.8 Hz, 1H), 2.01 – 1.88 (m, 2H), 1.78 (dd,  $J$  = 12.8, 8.8 Hz, 1H), 1.60 (dd,  $J$  = 12.6, 8.5 Hz, 1H), 1.36 (s, 9H), 1.10 (s, 3H), 1.03 (s, 3H).  $^{13}\text{C}$  NMR (126 MHz,  $\text{CDCl}_3$ )  $\delta$  201.61, 174.78, 136.98, 133.07, 128.71, 128.67, 80.49, 49.17, 46.78, 46.11, 44.78, 40.08, 29.23, 28.94, 28.13. The absolute configuration is assigned according to previous literature report<sup>2</sup>.

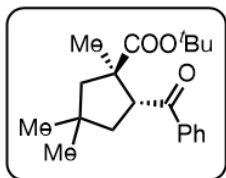

**tert-butyl (1R,2R)-2-benzoyl-1,4,4-trimethylcyclopentane-1-carboxylate ((R,R)-3f).** Followed General Method A with Ti-salen complex (**(S,S)-4e**) and corresponding alkene, the crude product was purified by column chromatography (1:19, EtOAc/hexanes) to give 28.6 mg (91% yield) of **(R,R)-3f** as a yellow oil. The dr was determined to be 19:1, trans diastereoisomer: 92% ee [AD, 0.5%  $^i\text{PrOH}$  in hexanes, 1.0 mL/min, 254 nm;  $t_1$  = 3.67 min,  $t_2$  = 4.30 min].  $[\alpha]_D^{22}$  -61.4 (c0.57,  $\text{CHCl}_3$ ). Followed General Method A with Ti-salen complex (**(S,S)-4a**) and corresponding alkene, the yield was determined to be 91%, the dr was determined to be >19:1, trans diastereoisomer: 60% ee [AD, 0.5%  $^i\text{PrOH}$  in hexanes, 1.0 mL/min, 254 nm;  $t_1$  = 3.64 min,  $t_2$  = 4.26 min]. The spectra data is consistent with previous literature report, there is also small portion of unreacted cyclopropyl ketone substrate which cannot be separated by chromatography, its peaks are assigned accordingly.  $^1\text{H}$  NMR (500 MHz,  $\text{CDCl}_3$ )  $\delta$  8.04 – 8.00 (m, 2H), 7.96 – 7.92 (m, cyclopropyl ketone), 7.52 (m, 1H), 7.47 (d, cyclopropyl ketone), 7.42 (m, 2H), 4.65 (dd,  $J$  = 11.4, 6.8 Hz, 1H), 2.48 (dd,  $J$  = 7.5, 5.7 Hz, cyclopropyl ketone), 2.22 (t,  $J$  = 12.1 Hz, 1H), 2.13 (dd,  $J$  = 13.5, 1.5 Hz, 1H), 1.66 (ddd,  $J$  = 12.9, 6.8, 1.6 Hz, 1H), 1.53 (d,  $J$  = 13.4 Hz, 1H), 1.38 (s, 9H), 1.14 (s, 3H), 1.10 (s, 3H), 1.03 (s, 3H).  $^{13}\text{C}$  NMR (126 MHz,  $\text{CDCl}_3$ )  $\delta$  201.98, 177.01, 138.47, 132.91, 132.54 (cyclopropyl ketone), 128.76, 128.58, 128.12 (cyclopropyl ketone), 80.78, 55.13, 53.54, 50.88, 43.87, 37.92, 33.02 (cyclopropyl ketone), 30.45, 29.13, 27.97, 27.20 (cyclopropyl ketone), 22.64, 22.15 (cyclopropyl ketone), 18.62 (cyclopropyl ketone). The absolute configuration is assigned according to previous literature report<sup>2</sup>.

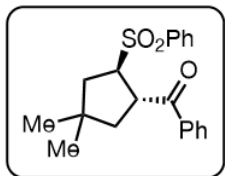

**((1S,2R)-4,4-dimethyl-2-(phenylsulfonyl)cyclopentyl)(phenyl)methanone ((R,R)-3g).** Followed General Method A with Ti-salen complex (**(S,S)-4e**) and corresponding alkene, the crude product was purified by column chromatography (1:4, EtOAc/hexanes) to give 21.3 mg (62% yield) of **(R,R)-3g** as a white solid. The dr was determined to be 17:1, trans diastereoisomer: 79% ee [AD, 6.0%  $^i\text{PrOH}$  in hexanes, 1.0 mL/min, 254 nm;  $t_1$  = 11.07 min,  $t_2$  = 14.30 min].  $[\alpha]_D^{22}$  -14.9 (c0.43,  $\text{CHCl}_3$ ). Followed General Method A with Ti-salen complex (**(S,S)-4a**) and corresponding alkene, the yield was determined to be 83%, the dr was determined to be 5:1, trans diastereoisomer: 25% ee [AD, 6.0%  $^i\text{PrOH}$  in hexanes, 1.0 mL/min, 254 nm;  $t_1$  = 11.11 min,  $t_2$  = 14.19 min]. The spectra data is consistent with previous literature report.  $^1\text{H}$  NMR (500 MHz,  $\text{CDCl}_3$ )  $\delta$  7.87 – 7.75 (m, 4H), 7.53 (dt,  $J$  = 19.7, 7.4 Hz, 2H), 7.42 (dt,  $J$  = 15.0, 7.6 Hz, 4H), 4.62 (q,  $J$  = 8.8 Hz, 1H), 4.35



(dt,  $J = 10.6, 7.4$  Hz, 1H), 2.18 (dt,  $J = 12.5, 9.3$  Hz, 2H), 1.90 (dd,  $J = 13.1, 8.7$  Hz, 1H), 1.59 (dd,  $J = 12.7, 6.6$  Hz, 1H), 1.18 (s, 3H), 0.96 (s, 3H).  $^{13}\text{C}$  NMR (126 MHz,  $\text{CDCl}_3$ )  $\delta$  198.49, 138.89, 135.58, 133.67, 133.52, 129.23, 128.74, 128.63, 128.50, 64.74, 47.28, 46.52, 40.99, 40.64, 28.87, 28.19. The absolute configuration is assigned according to previous literature report<sup>2</sup>.

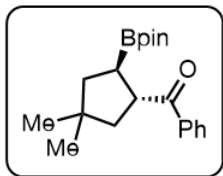

**((1R,2R)-4,4-dimethyl-2-(4,4,5,5-tetramethyl-1,3,2-dioxaborolan-2-yl)cyclopentyl)(phenyl)methanone ((R,R)-3h).** Followed General Method A with Ti-salen complex (**(S,S)-4e**) and corresponding alkene, the crude product was purified by column chromatography (1:19, EtOAc/hexanes) to give 11.0 mg (50% yield) of (**(R,R)-3h**) as a white solid. The dr was determined to be 7:1, trans diastereoisomer: 82% ee [AD, 0.5%  $^i\text{PrOH}$  in hexanes, 1.0 mL/min, 254 nm;  $t_1 = 5.03$  min,  $t_2 = 6.54$  min].  $[\alpha]_{\text{D}}^{22} -30.5$  (c0.22,  $\text{CHCl}_3$ ). Followed General Method A with Ti-salen complex (**(S,S)-4a**) and corresponding alkene, the yield was determined to be 44%, the dr was determined to be 7:1, trans diastereoisomer: 20% ee [AD, 0.5%  $^i\text{PrOH}$  in hexanes, 1.0 mL/min, 254 nm;  $t_1 = 5.19$  min,  $t_2 = 6.74$  min]. The spectra data is consistent with previous literature report, the product was isolated together with around 6% of cis diastereoisomer.  $^1\text{H}$  NMR (500 MHz,  $\text{CDCl}_3$ )  $\delta$  8.04 – 7.97 (m, 2H), 7.94 – 7.91 (m, cis diastereoisomer), 7.71 (dd,  $J = 5.7, 3.3$  Hz, cis diastereoisomer), 7.52 (t,  $J = 7.3$  Hz, 1H), 7.43 (t,  $J = 7.7$  Hz, 2H), 4.22 (dd,  $J = 8.5, 5.9$  Hz, cis diastereoisomer), 3.97 (q,  $J = 8.9$  Hz, 1H), 2.03 (q,  $J = 9.1$  Hz, 1H), 1.83 (dd,  $J = 12.7, 9.2$  Hz, 1H), 1.75 (dd,  $J = 12.3, 9.2$  Hz, 1H), 1.67 (dd,  $J = 12.7, 8.7$  Hz, 1H), 1.53 (dd,  $J = 12.3, 9.1$  Hz, 1H), 1.19 (d,  $J = 2.9$  Hz, 12H), 1.07 (s, 3H), 1.03 (s, 3H).  $^{13}\text{C}$  NMR (126 MHz,  $\text{CDCl}_3$ )  $\delta$  203.13, 137.55, 132.64, 128.80, 128.47, 83.37, 49.05, 46.26, 43.84, 40.85, 29.19, 28.93, 24.90, 24.80. The absolute configuration is assigned according to previous literature report<sup>2</sup>.

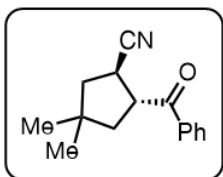

**(1R,2R)-2-benzoyl-4,4-dimethylcyclopentane-1-carbonitrile ((R,R)-3i).** Followed General Method A with Ti-salen complex (**(S,S)-4e**) and corresponding alkene, the crude product was purified by column chromatography (1:9, EtOAc/hexanes) to give 16.0 mg (70% yield) of (**(R,R)-3i**) as a white solid. The dr was determined to be 11:1, trans diastereoisomer: 52% ee [AS, 5.0%  $^i\text{PrOH}$  in hexanes, 1.0 mL/min, 254 nm;  $t_1 = 11.34$  min,  $t_2 = 15.60$  min].  $[\alpha]_{\text{D}}^{22} -54.7$  (c0.32,  $\text{CHCl}_3$ ). Followed General Method A with Ti-salen complex (**(S,S)-4a**) and corresponding alkene, the yield was determined to be 69%, the dr was determined to be 3:1, trans diastereoisomer: 30% ee [AS, 5.0%  $^i\text{PrOH}$  in hexanes, 1.0 mL/min, 254 nm;  $t_1 = 11.35$  min,  $t_2 = 15.57$  min]. IR(Film) 2958, 2932, 2869, 1681, 1597, 1580, 1464, 1448, 1371, 1240, 1223, 1010, 849, 772, 699, 669, 656  $\text{cm}^{-1}$ .  $^1\text{H}$  NMR (500 MHz,  $\text{CDCl}_3$ )  $\delta$  7.99 – 7.91 (m, 2H), 7.65 – 7.57 (m, 1H), 7.54 – 7.46 (m, 2H), 4.18 (dt,  $J = 9.9, 8.1$  Hz, 1H), 3.74 (q,  $J = 8.3$  Hz, 1H), 2.12 (dd,  $J = 13.1, 9.9$  Hz, 1H), 2.05 (dd,  $J = 12.9, 8.9$  Hz, 1H), 1.93 (dd,  $J = 12.9, 8.2$  Hz, 1H), 1.61 – 1.54 (m, 1H), 1.22 (s, 3H), 1.02 (s, 3H).  $^{13}\text{C}$  NMR (126 MHz,  $\text{CDCl}_3$ )  $\delta$  198.40, 135.63, 133.86, 128.99, 128.81, 122.81, 77.16, 51.74,

46.06, 45.23, 40.78, 28.87, 28.52, 28.34. MS (DART) exact mass calculated for  $[C_{15}H_{18}NO^+]$ : 228.1379, found 228.1377.

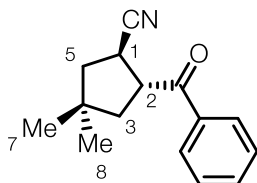

Relative stereochemistry assignments were based on 1D  $^1H$  supported by ROESY and HSQC. Major product *trans*: ROE from H2, H3' (top), H5' (top) to H7 defines "top". ROE from H8 to H3'' (bottom), H5'' (bottom) and H1 defines "bottom" and shows that H2 is *trans* to H1. The absolute configuration is assigned according to previous literature report<sup>2</sup>.

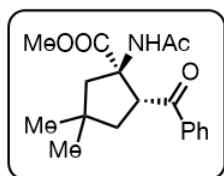

**methyl (1*R*,2*R*)-1-acetamido-2-benzoyl-4,4-dimethylcyclopentane-1-carboxylate ((*R,R*)-3j).**

Followed General Method A with Ti-salen complex (**(*S,S*)-4e** and corresponding alkene, the crude product was purified by column chromatography (2:3, EtOAc/hexanes) to give 24.8 mg (83% yield, containing another diastereoisomer in a ratio of 10:1) of (**(*R,R*)-3j**) as a white solid. The dr was determined to be 10:1, trans diastereoisomer: 95% ee [AS, 3.0%  $^iPrOH$  in hexanes, 1.0 mL/min, 254 nm;  $t_1$  = 10.92 min,  $t_2$  = 14.64 min].  $[\alpha]_D^{22}$  -72.8 (c0.50,  $CHCl_3$ ). Followed General Method A with Ti-salen complex (**(*S,S*)-4a** and corresponding alkene, the yield was determined to be 58%, the dr was determined to be 6:1, trans diastereoisomer: 87% ee[AS, 3.0%  $^iPrOH$  in hexanes, 1.0 mL/min, 254 nm;  $t_1$  = 10.93 min,  $t_2$  = 14.60 min]. IR(Film) 3294, 3209, 3062, 2979, 2953, 2868, 1738, 1679, 1655, 1596, 1580, 1539, 1448, 1370, 1318, 1275, 1244, 1215, 1181, 1136, 1071, 1018, 1001, 983, 837, 55, 697, 663  $cm^{-1}$ .  $^1H$  NMR (500 MHz,  $CDCl_3$ )  $\delta$  8.05 – 7.99 (m, minor diastereoisomer), 7.92 – 7.83 (m, 2H), 7.60 (t,  $J$  = 7.6 Hz, minor diastereoisomer), 7.54 (t,  $J$  = 7.5 Hz, 1H), 7.50 – 7.47 (m, minor diastereoisomer), 7.44 (t,  $J$  = 7.6 Hz, 2H), 7.32 (s, minor diastereoisomer), 6.78 (s, 1H), 5.43 (dd,  $J$  = 13.4, 7.3 Hz, 1H), 4.23 (dd,  $J$  = 12.4, 6.9 Hz, minor diastereoisomer), 3.84 (s, 3H), 3.39 (s, minor diastereoisomer), 2.56 (d,  $J$  = 14.4 Hz, minor diastereoisomer), 2.52 (d,  $J$  = 14.0 Hz, 1H), 2.44 (d,  $J$  = 14.3 Hz, minor diastereoisomer), 2.25 (t,  $J$  = 12.9 Hz, 1H), 2.18 (t,  $J$  = 12.7 Hz, minor diastereoisomer), 1.98 (dd,  $J$  = 11.0, 3.9 Hz, 1H, in this region it contains one methine and one methyl peak from minor diastereoisomer), 1.93 (s, 3H), 1.46 (s, 3H), 1.18 (d,  $J$  = 7.0 Hz, methyl groups from minor diastereoisomer), 1.14 (s, 3H).  $^{13}C$  NMR (126 MHz,  $CDCl_3$ )  $\delta$  201.88(minor diastereoisomer), 199.95, 175.87, 172.89(minor diastereoisomer), 170.21(minor diastereoisomer), 169.42, 136.89, 134.16(minor diastereoisomer), 133.40, 128.97(minor diastereoisomer), 128.75, 128.67(minor diastereoisomer), 128.61, 128.39(minor diastereoisomer), 69.26(minor diastereoisomer), 68.02, 52.98, 52.84, 52.39(minor diastereoisomer), 50.46(minor diastereoisomer), 50.00(minor diastereoisomer), 48.06, 45.59, 45.53, 38.08, 36.89(minor diastereoisomer), 32.15, 31.63(minor diastereoisomer), 31.59(minor diastereoisomer), 30.55, 24.69, 23.53(minor diastereoisomer). MS (DART) exact mass calculated for  $[C_{18}H_{24}NO_4^+]$ : 318.1694, found 318.1690.

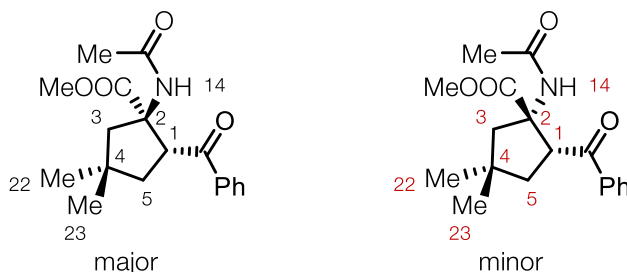

Relative stereochemistry assignments were based on 1D  $^1\text{H}$  supported by ROESY and HSQC. Major product: NOE from H3' (top) to H14 defines "top" and shows H1 is on the same side of H14. Minor product: NOE from H14 to H3'' (bottom), H5'' (bottom) and H1 defines "bottom" and shows that H1 is on the opposite side of H14. The absolute configuration is assigned according to previous literature report<sup>2</sup>.

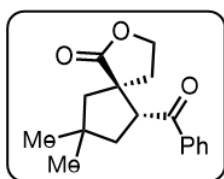

**(5S,6R)-6-benzoyl-8,8-dimethyl-2-oxaspiro[4.4]nonan-1-one ((R,R)-3k).** Followed General Method A with Ti-salen complex (**(S,S)-4e**) and corresponding alkene, the crude product was purified by column chromatography (1:9, EtOAc/hexanes) to give 24.7 mg (90% yield) of **(R,R)-3k** as a white solid. The dr was determined to be 7:1, trans diastereoisomer: 91% ee [AS, 10.0%  $^i\text{PrOH}$  in hexanes, 1.0 mL/min, 254 nm;  $t_1 = 7.79$  min,  $t_2 = 9.72$  min].  $[\alpha]_D^{22} -48.8$  (c0.49,  $\text{CHCl}_3$ ). Followed General Method A with Ti-salen complex (**(S,S)-4a**) and corresponding alkene, the yield was determined to be 85%, the dr was determined to be 6:1, trans diastereoisomer: 66% ee [AS, 10.0%  $^i\text{PrOH}$  in hexanes, 1.0 mL/min, 254 nm;  $t_1 = 7.77$  min,  $t_2 = 9.68$  min]. IR (Film) 2954, 2928, 2868, 1758, 1668, 1595, 1579, 1463, 1447, 1367, 1314, 1268, 1247, 1165, 1021, 967, 836, 807, 731, 688  $\text{cm}^{-1}$ .  $^1\text{H}$  NMR (500 MHz,  $\text{CDCl}_3$ )  $\delta$  8.01 – 7.93 (m, 2H), 7.61 – 7.52 (m, 1H), 7.51 – 7.40 (m, 2H), 4.40 (dd,  $J = 11.9, 6.8$  Hz, 1H), 4.09 (dt,  $J = 8.8, 7.3$  Hz, 1H), 3.93 (td,  $J = 8.6, 4.9$  Hz, 1H), 2.35 (dt,  $J = 12.9, 7.7$  Hz, 1H), 2.24 – 2.15 (m, 2H), 2.04 (ddd,  $J = 12.7, 7.3, 5.0$  Hz, 1H), 1.85 (dd,  $J = 12.9, 6.8$  Hz, 1H), 1.75 (d,  $J = 13.3$  Hz, 1H), 1.22 (s, 3H), 1.18 (s, 3H).  $^{13}\text{C}$  NMR (126 MHz,  $\text{CDCl}_3$ )  $\delta$  200.33, 181.42, 136.94, 133.83, 129.04, 128.68, 77.16, 65.90, 53.79, 52.94, 51.18, 44.75, 38.16, 33.82, 30.61, 30.03, 29.82. MS (DART) exact mass calculated for  $[\text{C}_{17}\text{H}_{21}\text{O}_3]^+$ : 273.1480, found 273.1474.

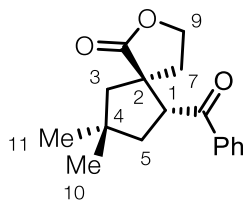

Relative stereochemistry assignments were based on 1D  $^1\text{H}$  supported by ROESY and HSQC. Major product trans: ROE from H1, H3' (top), H5' (top) to H10 defines "top". ROE from H3'' (bottom), H5'' (bottom) to H11 defines "bottom". Key NOE correlation is from H7'' to H3'', indicating that two methylene groups are on the same side of benzoyl group. The absolute configuration is assigned according to previous literature report<sup>2</sup>.

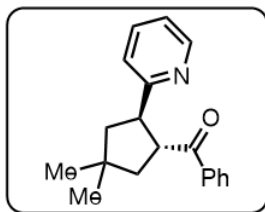

**((1R,2R)-4,4-dimethyl-2-(pyridin-2-yl)cyclopentyl)(phenyl)methanone ((R,R)-3l).** Followed General Method A with Ti-salen complex (**(S,S)**-4e and corresponding alkene, the crude product was purified by column chromatography (1:9, EtOAc/hexanes) to give 18.6 mg (67% yield) of **(R,R)-3l** as a white solid. The dr was determined to be 10:1, trans diastereoisomer: 94% ee [OD, 3.0% *i*PrOH in hexanes, 1.0 mL/min, 254 nm; t<sub>1</sub> = 5.51 min, t<sub>2</sub> = 8.23 min]. [ $\alpha$ ]<sub>D</sub><sup>22</sup> -57.8 (c0.37, CHCl<sub>3</sub>). Followed General Method A with Ti-salen complex (**(S,S)**-4a and corresponding alkene, the yield was determined to be 85%, the dr was determined to be >19:1, trans diastereoisomer: 39% ee[OD, 3.0% *i*PrOH in hexanes, 1.0 mL/min, 254 nm; t<sub>1</sub> = 5.41 min, t<sub>2</sub> = 7.94 min]. IR(Film). 3048, 3006, 2952, 2925, 2865, 2856, 1681, 1589, 1567, 1472, 1448, 1436, 1339, 1276, 1257, 1223, 1209, 1179, 1011, 993, 788, 772, 758, 706, 686, 669, 652, 531 cm<sup>-1</sup>. <sup>1</sup>H NMR (500 MHz, CDCl<sub>3</sub>)  $\delta$  8.55 – 8.48 (m, 1H), 7.93 – 7.85 (m, 2H), 7.48 (tq, *J* = 5.4, 1.6 Hz, 2H), 7.38 (t, *J* = 7.6 Hz, 2H), 7.17 (d, *J* = 7.7 Hz, 1H), 7.07 – 6.99 (m, 1H), 4.42 – 4.33 (m, 1H), 4.05 (ddd, *J* = 11.4, 9.4, 7.5 Hz, 1H), 2.19 (dd, *J* = 12.9, 10.6 Hz, 1H), 2.07 – 1.93 (m, 2H), 1.74 (dd, *J* = 13.0, 8.1 Hz, 1H), 1.20 (s, 3H), 1.13 (s, 3H). <sup>13</sup>C NMR (126 MHz, CDCl<sub>3</sub>)  $\delta$  202.16, 162.96, 149.52, 137.07, 136.29, 132.85, 128.71, 128.51, 123.66, 121.44, 53.03, 48.91, 48.75, 46.39, 39.55, 30.26, 29.84, 29.71. MS (DART) exact mass calculated for [C<sub>19</sub>H<sub>22</sub>NO<sup>+</sup>]: 280.1691, found 280.1685. The absolute configuration is assigned according to previous literature report<sup>2</sup>.

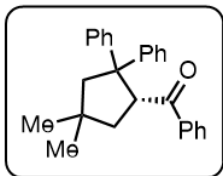

**(R)-(4,4-dimethyl-2,2-diphenylcyclopentyl)(phenyl)methanone ((R,R)-3m).** Followed General Method A with Ti-salen complex (**(S,S)**-4e and corresponding alkene, the crude product was purified by column chromatography (2:3, DCM/hexanes) to give 10.0 mg (29% yield) of **(R,R)-3m** as a white solid. 82% ee [OD, 1.0% *i*PrOH in hexanes, 1.0 mL/min, 254 nm; t<sub>1</sub> = 6.72 min, t<sub>2</sub> = 7.79 min]. [ $\alpha$ ]<sub>D</sub><sup>22</sup> -142.5 (c0.2, CHCl<sub>3</sub>). Followed General Method A with Ti-salen complex (**(S,S)**-4a and corresponding alkene, the yield was determined to be 74%, 32% ee[OD, 1.0% *i*PrOH in hexanes, 1.0 mL/min, 254 nm; t<sub>1</sub> = 6.53 min, t<sub>2</sub> = 7.57 min]. The spectra data is consistent with previous literature report. <sup>1</sup>H NMR (500 MHz, CDCl<sub>3</sub>)  $\delta$  7.75 – 7.70 (m, 2H), 7.48 – 7.42 (m, 3H), 7.34 (t, *J* = 7.6 Hz, 2H), 7.29 (t, *J* = 7.6 Hz, 2H), 7.15 (t, *J* = 7.3 Hz, 1H), 7.09 (d, *J* = 7.3 Hz, 2H), 7.00 (t, *J* = 7.6 Hz, 2H), 6.91 (t, *J* = 7.3 Hz, 1H), 5.16 (d, *J* = 8.7 Hz, 1H), 3.27 (d, *J* = 12.6 Hz, 1H), 2.43 (d, *J* = 12.6 Hz, 1H), 2.22 (dd, *J* = 13.9, 8.7 Hz, 1H), 1.97 (dd, *J* = 13.8, 1.8 Hz, 1H), 1.21 (s, 3H), 0.67 (s, 3H). <sup>13</sup>C NMR (126 MHz, CDCl<sub>3</sub>)  $\delta$  203.10, 148.79, 147.30, 138.67, 132.32, 128.47, 128.39, 128.13, 127.91, 127.50, 126.93, 125.87, 125.50, 59.94, 53.57, 52.04, 44.26, 38.28, 32.38, 31.97. The absolute configuration is assigned according to previous literature report<sup>2</sup>.

## Section 6. Non-linear effect study and diffusion NMR experiments

### Non-linear effect study

Non-linear effect study was conducted to verify whether this system operates through a monomeric or multiple center. Catalysts made from (1R,2R)-1,2-diphenylethane-1,2-diamine and (1S,2S)-1,2-diphenylethane-1,2-diamine are mixed in different ratios (roughly 3:2, 7:3, 4:1, 9:1). The accurate enantiomeric excess (ee) of the mixed catalysts was determined by HPLC. Subsequently, following General Method A, each portion mixture of catalysts was dissolved in 2 mL EA and 1 mL of catalyst mixture was used as catalyst to conduct standard reaction. Considering the solubility of the Ti catalysts, para-*t*Bu-ortho-*t*Bu Ti-catalysts were used for the study. The crude product was purified, and isolated product was submitted to HPLC to test the ee of product. The ee of products then was plotted versus the ee of the catalysts.

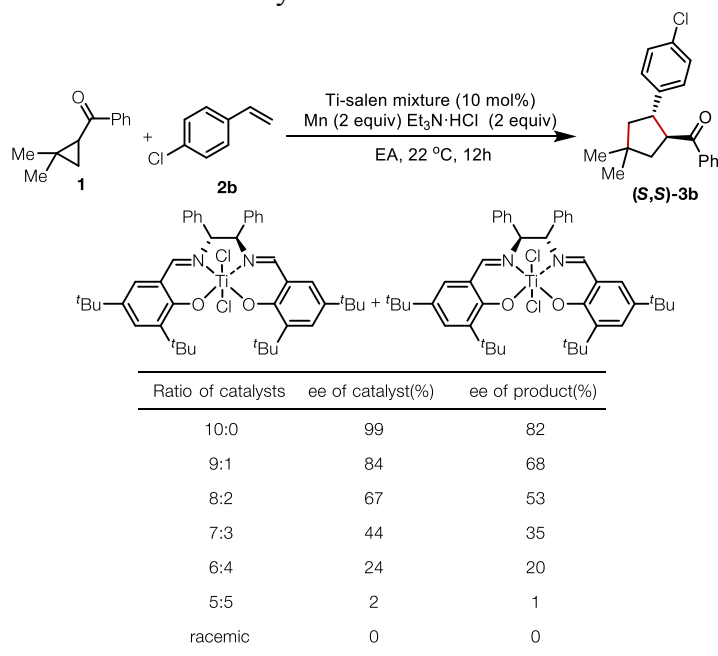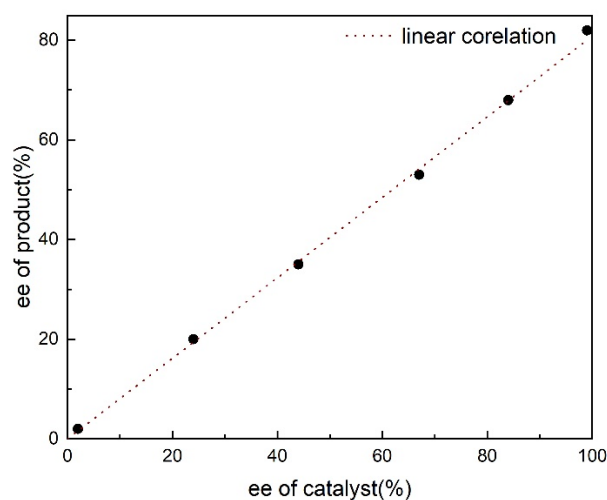

**Figure S1.** Non-linear effect plot. No obvious non-linear effect was observed for p-*t*Bu-o-*t*Bu Ti catalysts.

## Diffusion NMR

Diffusion NMR spectra were acquired on a Varian INOVA 600 MHz spectrometer equipped with a 5 mm HCN inverse detection triple resonance probe with single-axis pulsed field gradients using the DgcsteSL\_cc stimulated echo sequence with self-compensating gradient schemes and convection compensation<sup>3</sup> as provided in VnmrJ 3.2A. The diffusion delay was set at 150 ms, and the strength of the diffusion gradient with duration of 1.4 ms was varied from 3 to 76 G/cm in 32 square spaced increments. Spectra for each PFG increment were collected with 4 steady state scans and 8 scans, 1.6 s acquisition time and 3 s relaxation delay. Diffusion datasets were analyzed in MNova 14.0.1 (Mestrelab Research) with single exponential fitting of integrals of multiple resonances in each compound after careful phasing and 7th order polynomial baseline correction. The ligand and complex were chosen because they are structurally similar to optimal catalyst and have good solubilities. The diffusion coefficients for salen and complex were found to be  $3.8 \times 10^{-6} \text{ cm}^2/\text{s}$  and  $4.0 \times 10^{-6} \text{ cm}^2/\text{s}$ , respectively, indicating that the aggregation states of both compounds are similar.

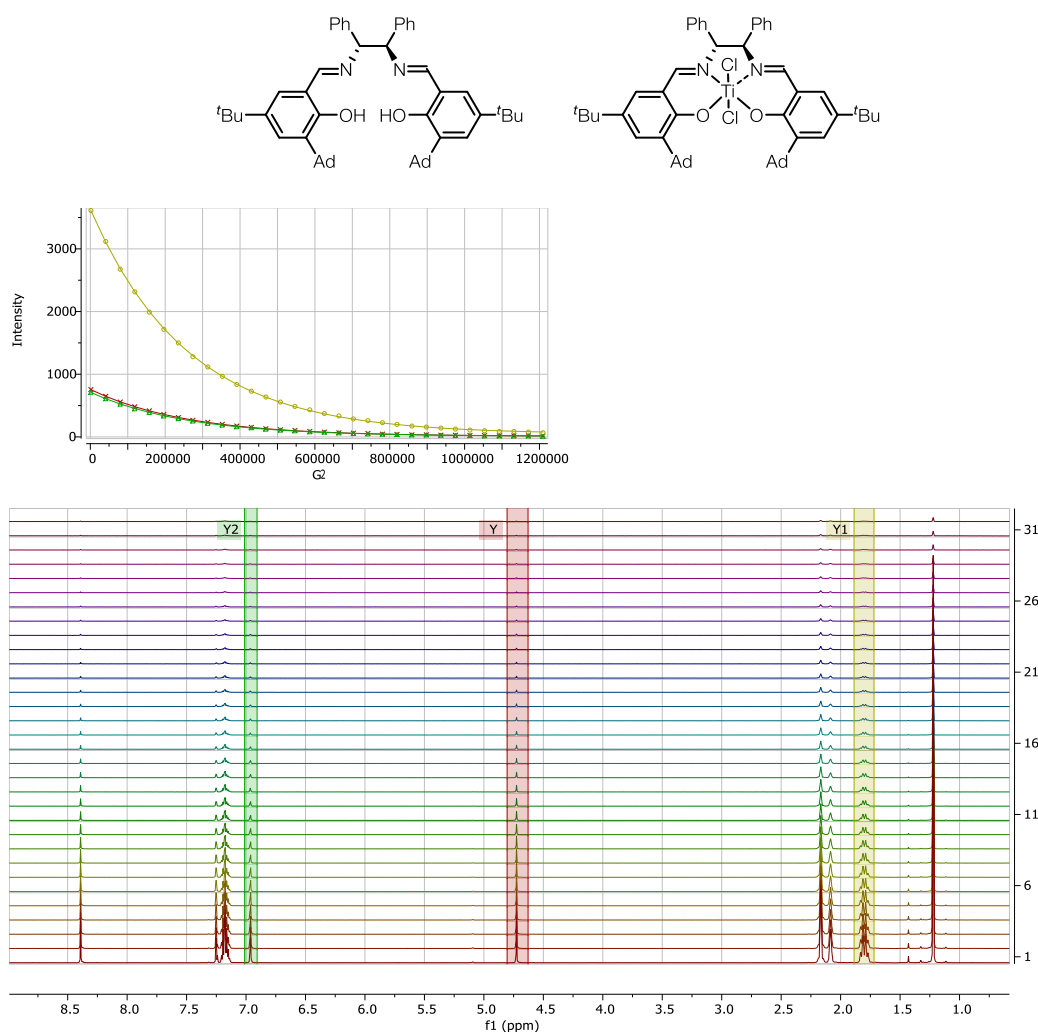

**Figure S2.** Diffusion NMR spectrum of ortho-Ad para-tBu salen ligand

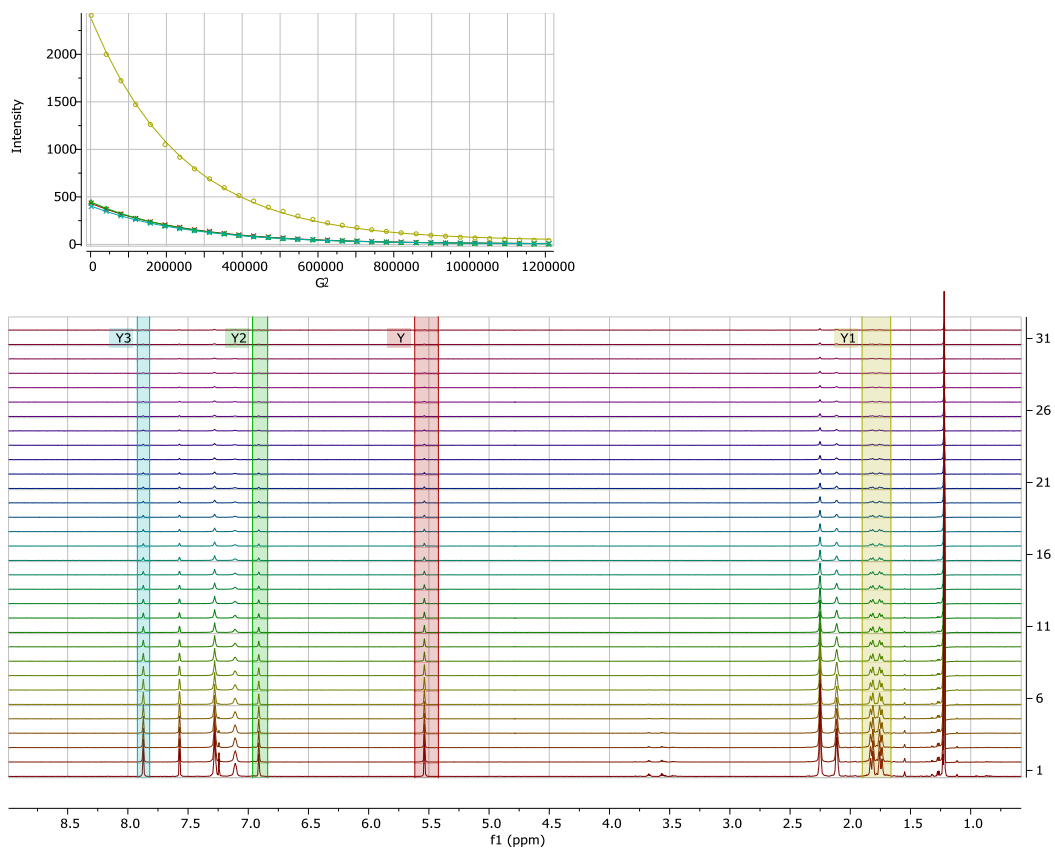

**Figure S3.** Diffusion NMR spectrum of ortho-Ad para-tBu Ti complex

## Section 7. Electrochemical studies of catalysts

### Cyclic voltammetry study

Cyclic voltammetry (CV) experiments were conducted in a N<sub>2</sub>-filled glovebox with a 10 mL glass vial fitted with a glassy carbon working electrode (3 mm in diameter, BASi), a nonaqueous Ag/Ag<sup>+</sup> (0.01 M AgNO<sub>3</sub> in 0.1 M Bu<sub>4</sub>PF<sub>6</sub>/MeCN) reference electrode, and a platinum wire counter electrode. The catalyst of interest was dissolved in anhydrous DCM with Bu<sub>4</sub>NPF<sub>6</sub> as electrolyte. Current was reported in  $\mu$ A, while all potentials were reported in mV against the Fc<sup>+/0</sup> redox couple. The CV study revealed that there is a weak correlation between the electronic properties of para-substituents and redox potentials of Ti-catalysts, ranging from -0.95 V to -1.13 V. But complex with electron-neutral or electron-rich substituents have almost same redox potential. Notably, para-CF<sub>3</sub> complex has a less reversible redox activity.

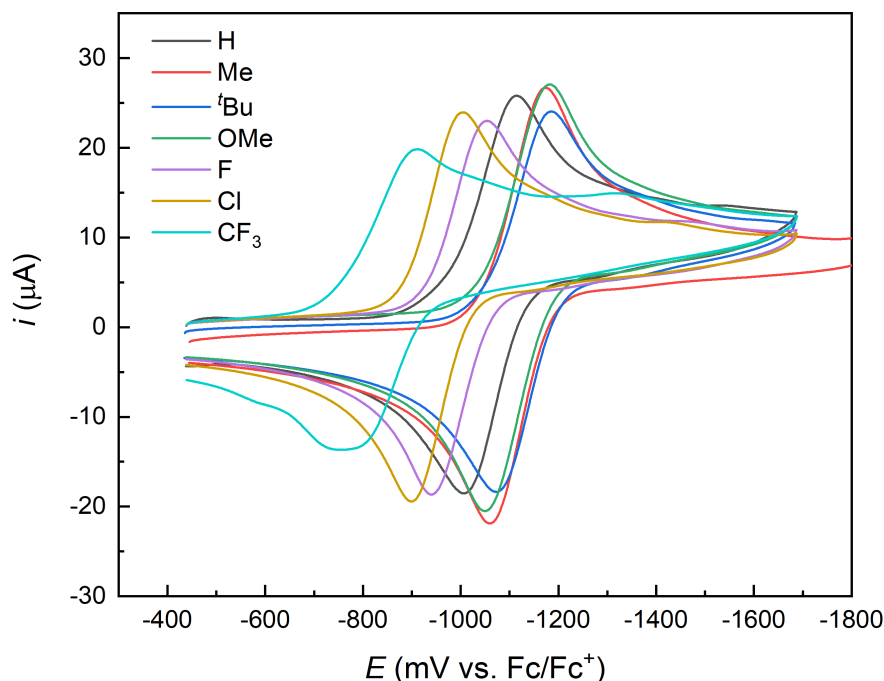

**Figure S4.** Cyclic voltammogram of *ortho*-Ad Ti(salen) complexes. Para-substituents of catalysts were varied, and CVs were recorded respectively. Conditions: Ti-complexes (2 mM), Bu<sub>4</sub>NPF<sub>6</sub> (0.2 M) in DCM. Scan rate: 100 mV/s.

### Stability test with bulk electrolysis

Electrochemical stability experiments were conducted in a nitrogen filled glovebox using 1 mM solutions of catalyst in 0.1 M Bu<sub>4</sub>PF<sub>6</sub>/DCM. A Pine Wavenow potentiostat was employed for controlled potential bulk electrolysis and cyclic voltammograms. Reticulated vitreous carbon (RVC) (100 PPI, 4 x 0.5 x 0.5 cm<sup>3</sup>) was purchased from ERG Aerospace and used as received. Fresh anodes and cathodes were prepared for each experiment by affixing nickel wire to RVC. A custom divided cell separated with a fine frit and additional two ports on the anodic side to accommodate a reference electrode and glassy carbon working electrode (3 mm) was used for controlled potential bulk electrolysis. A nonaqueous Ag/Ag<sup>+</sup> (0.01 M AgNO<sub>3</sub> in 0.1 M Bu<sub>4</sub>PF<sub>6</sub>/MeCN) reference electrode was used for bulk electrolysis experiments and was kept proximal to the working electrode during controlled potential electrolysis. CVs were collected



using a glassy carbon working electrode (0.071 cm<sup>2</sup>), platinum wire auxiliary electrode, and nonaqueous Ag/Ag<sup>+</sup> reference electrode.

To the cathodic compartment was added 0.1 M Bu<sub>4</sub>PF<sub>6</sub>/DCM (5 mL) and a magnetic stir bar. To the anodic side was added a stir bar and 1 mM solution of catalyst in 0.1 M Bu<sub>4</sub>PF<sub>6</sub>/DCM (5 mL). The glassy carbon electrode, platinum wire auxiliary electrode, and nonaqueous Ag/Ag<sup>+</sup> reference electrode were then immersed in the anodic side solution and a CV was recorded at 500 mV/s. The platinum wire electrode and glassy carbon electrode were removed. The RVC anode and cathode were then inserted into the anodic and cathodic solutions, respectively. The RVC anode and cathode were submerged such that 2 cm of the RVC was in contact with the solution. Controlled potential bulk electrolysis was then performed at -1.3 V vs. Ag/AgNO<sub>3</sub> until the current plateaued at 0 A. At this point, controlled potential electrolysis was initiated at 0 V vs. Ag/AgNO<sub>3</sub> until the current plateaued at 0 A to return all of the reduced Ti<sup>III</sup>(salen) to the original Ti<sup>IV</sup>(salen) redox state. After electrolysis was stopped, the glassy carbon electrode and platinum wire auxiliary electrode were inserted into the anodic solution and the “After Electrolysis” CV was recorded at 50 mVs. Overlay of the “Before Electrolysis” and “After Electrolysis” CVs revealed a diminish in current after electrolysis for *p*-CF<sub>3</sub> Ti(salen), indicative that this complex is unstable to reduction.

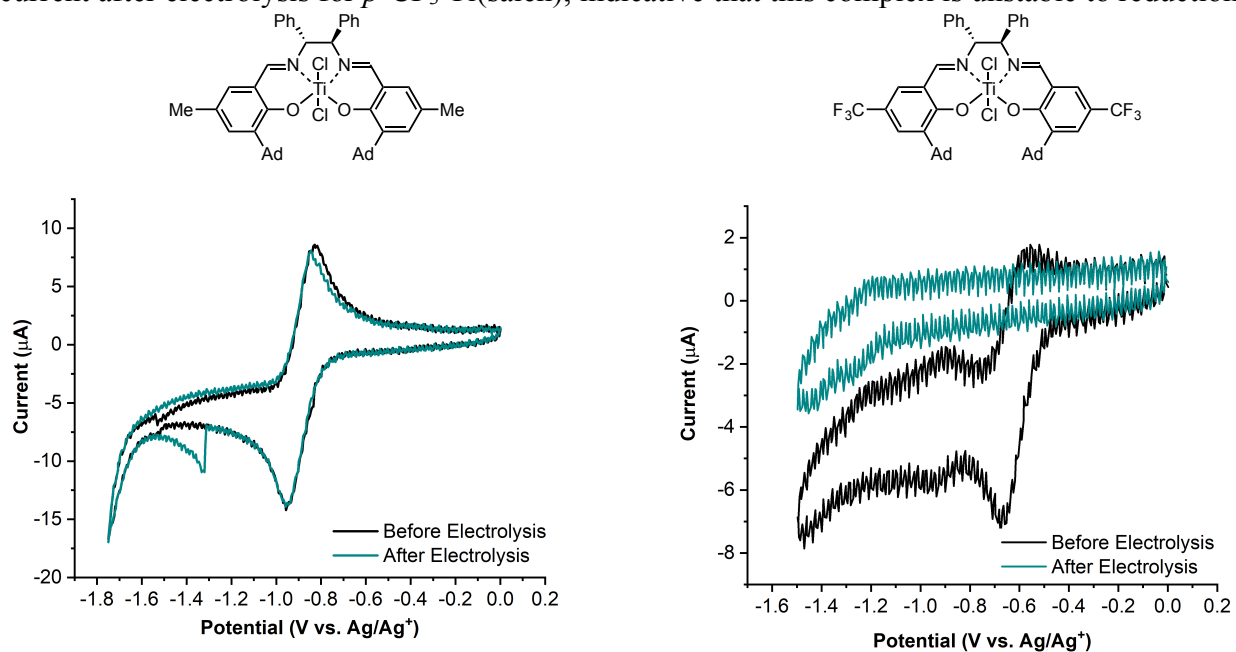

**Figure S5.** Before and after electrolysis CVs of (left) *p*-Me Ti(salen) and (right) *p*-CF<sub>3</sub> Ti(salen).

## **Section 8. Reference**

1. Kim, H.; Nguyen, Y.; Yen, C. P. H.; Chagal, L.; Lough, A. J.; Kim, B. M.; Chin, J. Stereospecific synthesis of C<sub>2</sub> symmetric diamines from the mother diamine by resonance-assisted hydrogen-bond directed diaza-Cope rearrangement. *J. Am. Chem. Soc.* **2008**, *130*, 12184-12191.
2. Hao, W.; Harenberg, J. H.; Wu, X.; MacMillan, S. N.; Lin, S. Diastereo- and enantioselective formal [3+ 2] cycloaddition of cyclopropyl ketones and alkenes via Ti-catalyzed radical redox relay *J. Am. Chem. Soc.* **2018**, *140*, 3514-3517.
3. Jerschow, A.; Müller, N. Suppression of Convection Artifacts in Stimulated-Echo Diffusion Experiments. Double-Stimulated-Echo Experiments *J. Magn. Reson.* **1997**, *125*, 372-375.

## Section 9. Spectral data for products

**((1R,2R)-2-(4-methoxyphenyl)-4,4-dimethylcyclopentyl)(phenyl)methanone ((R,R)-3a).**

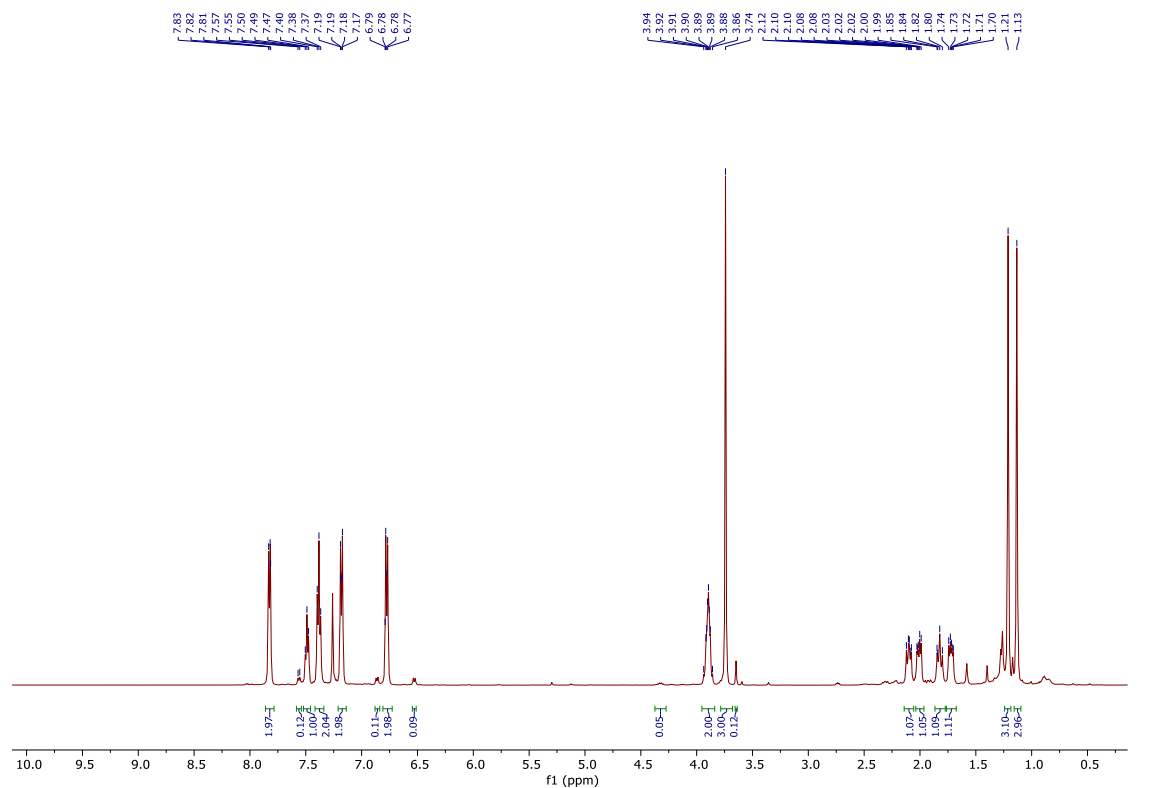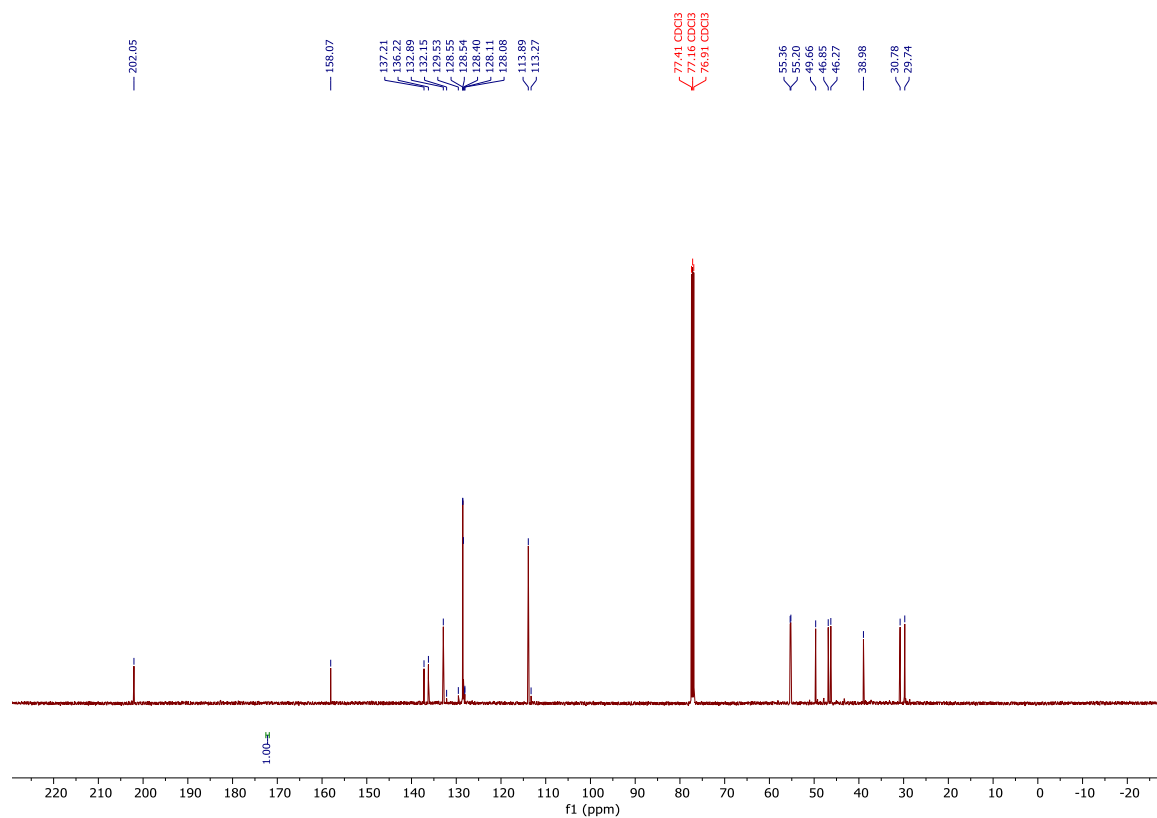

**((1R,2R)-2-(4-chlorophenyl)-4,4-dimethylcyclopentyl)(phenyl)methanone ((R,R)-3b).**

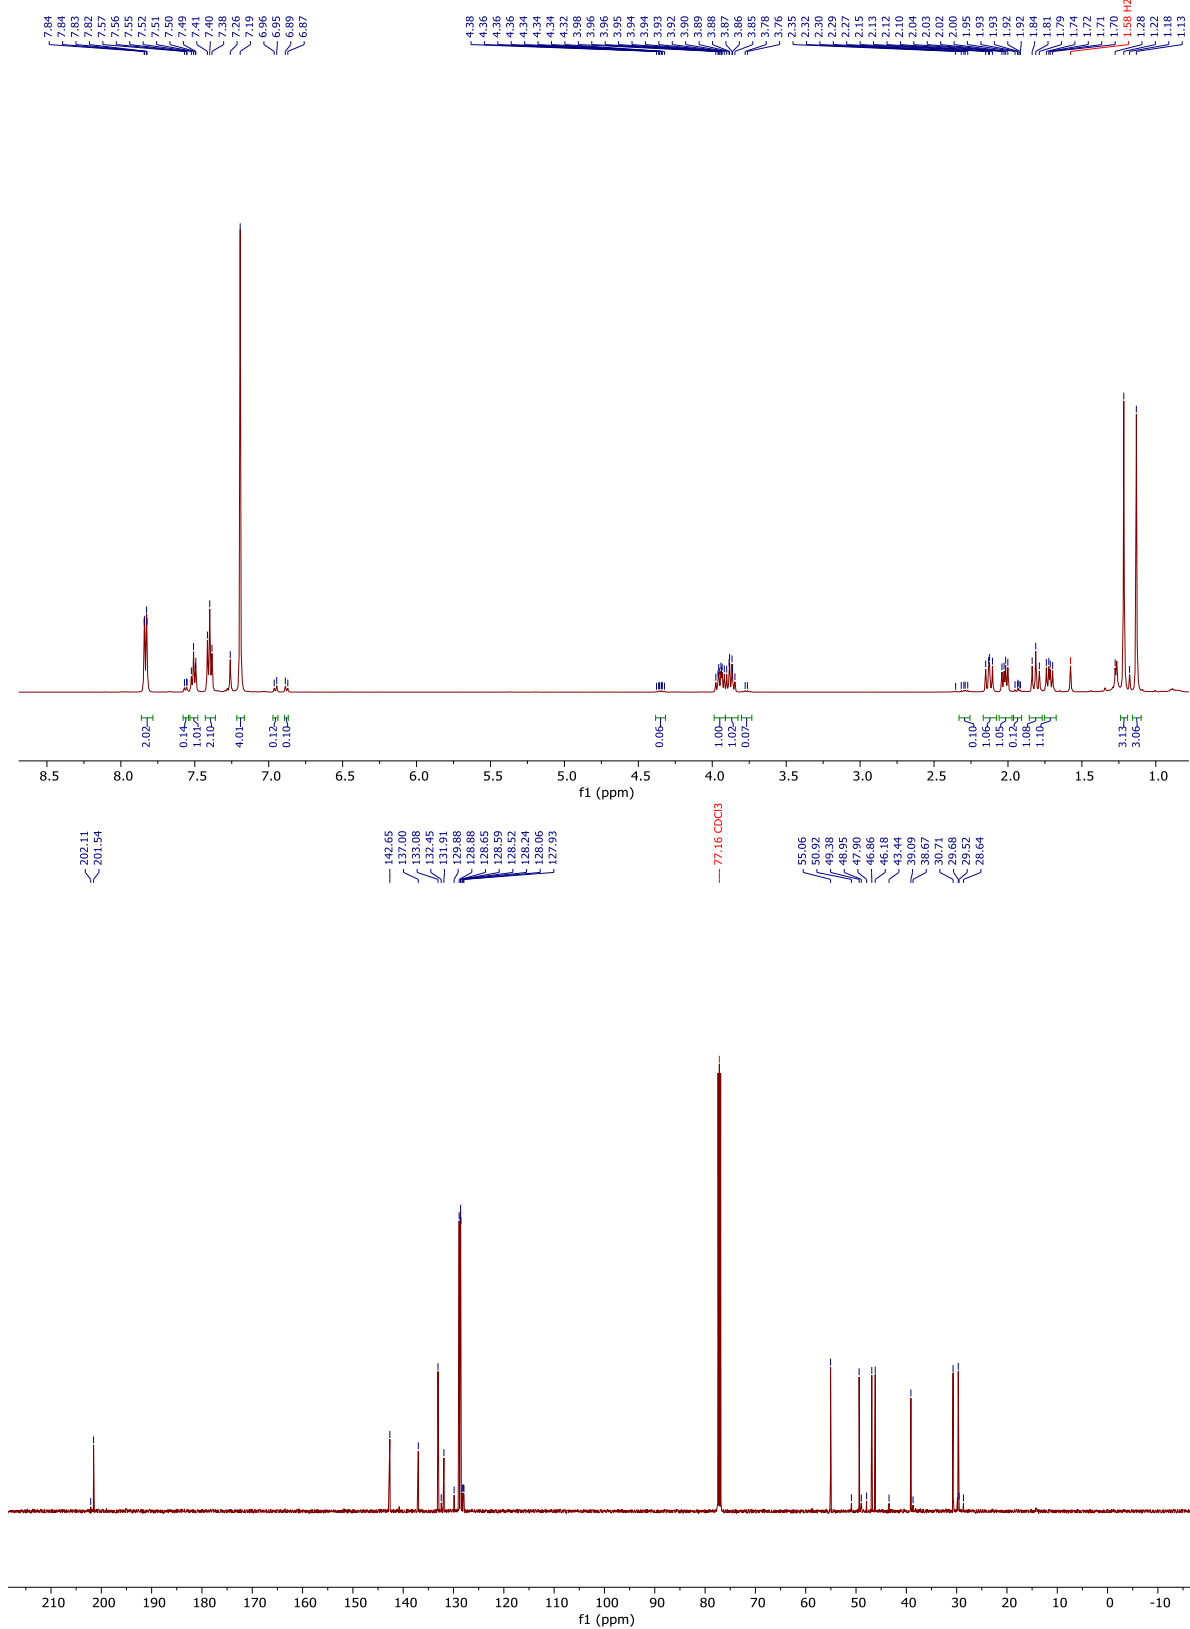

4-((1R,2R)-2-benzoyl-4,4-dimethylcyclopentyl)benzonitrile ((*R,R*)-3d).

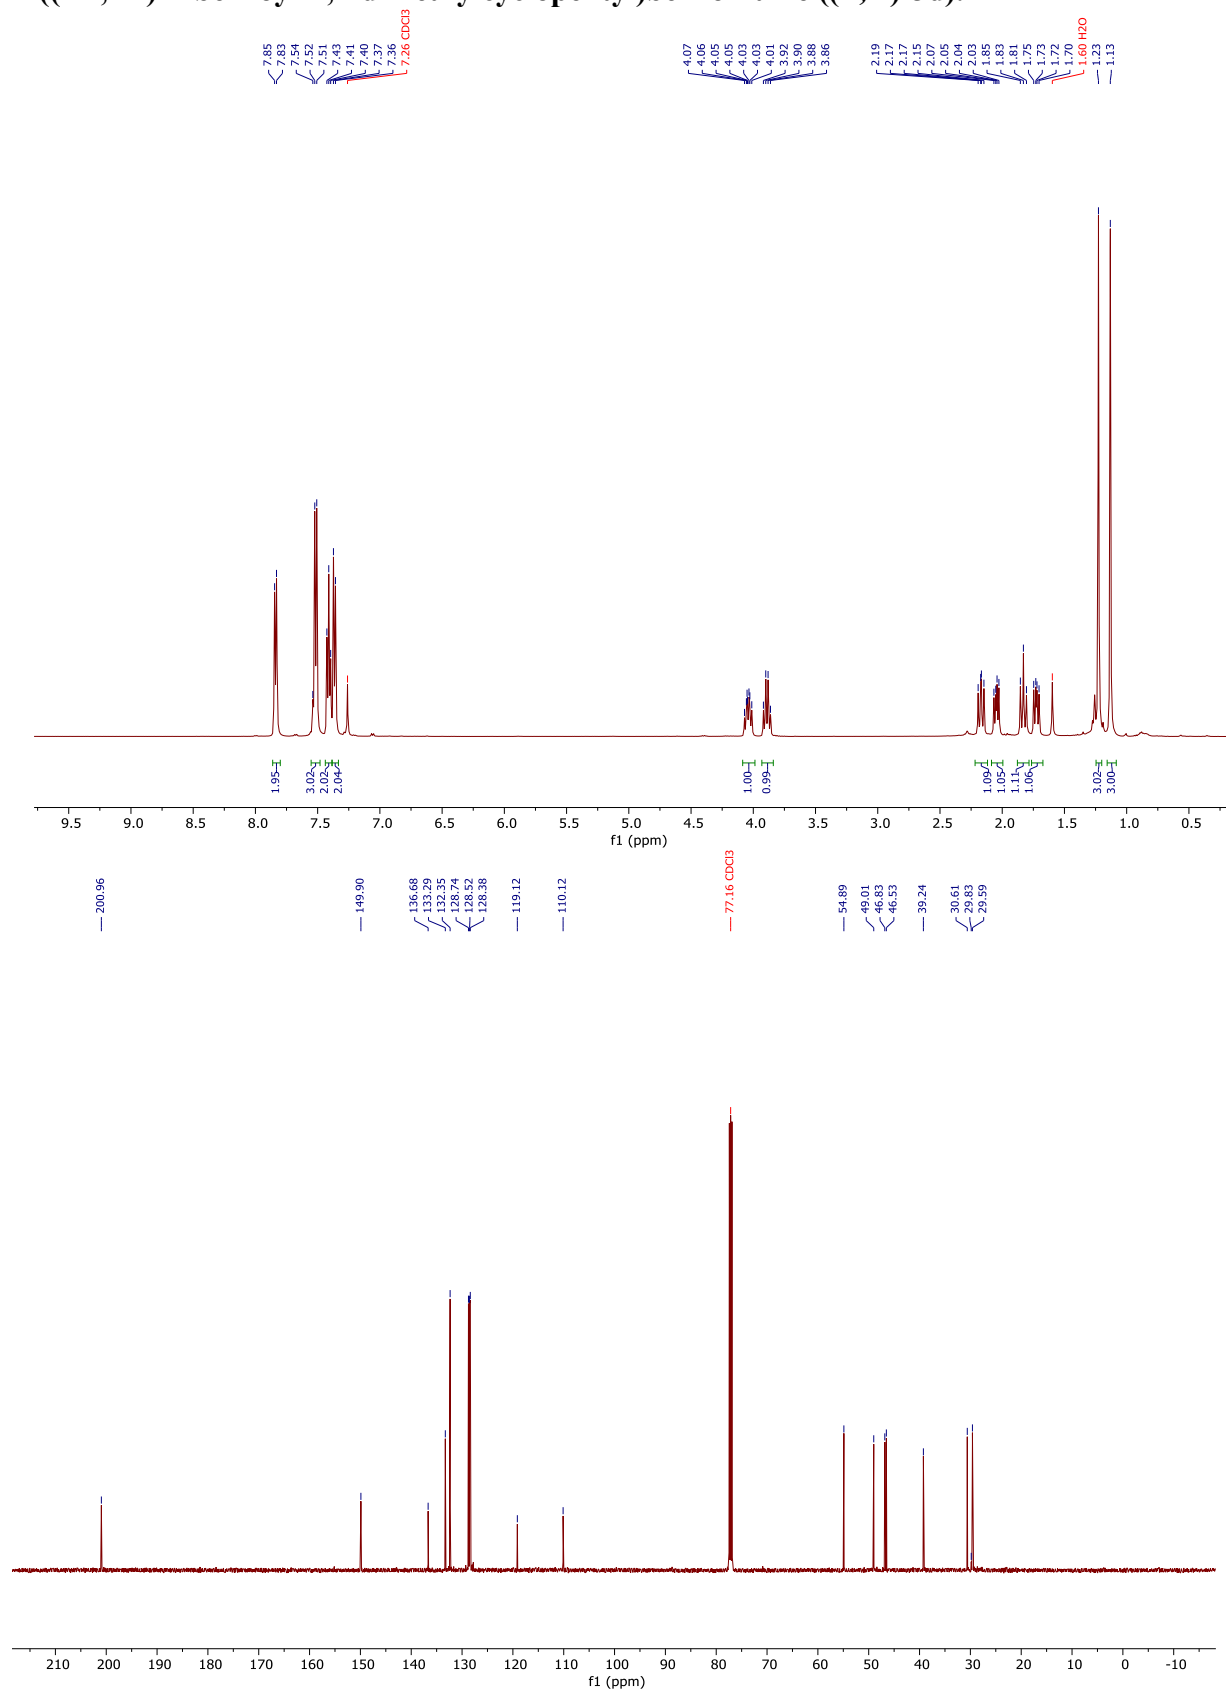

***tert*-butyl (1*R*,2*R*)-2-benzoyl-4,4-dimethylcyclopentane-1-carboxylate ((*R,R*)-3e).**

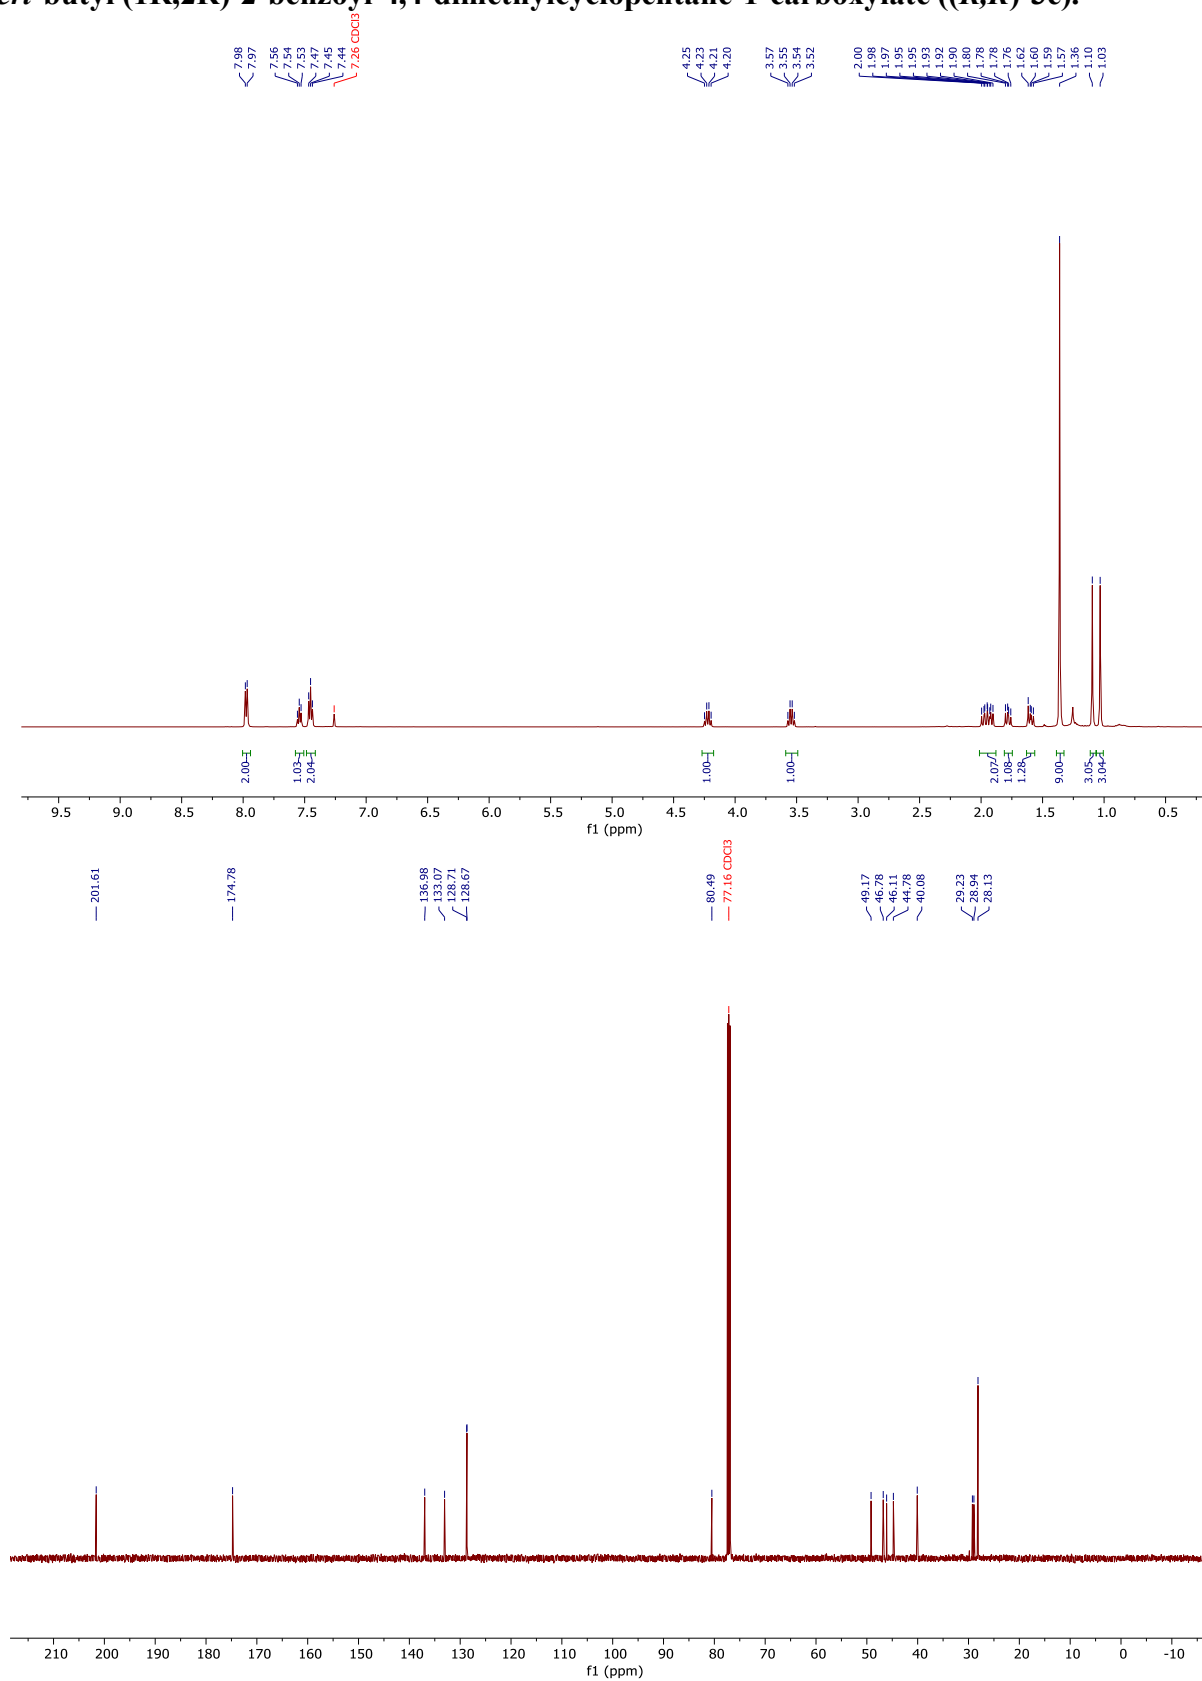

***tert*-butyl (1*R*,2*R*)-2-benzoyl-1,4,4-trimethylcyclopentane-1-carboxylate ((*R,R*)-3f).**

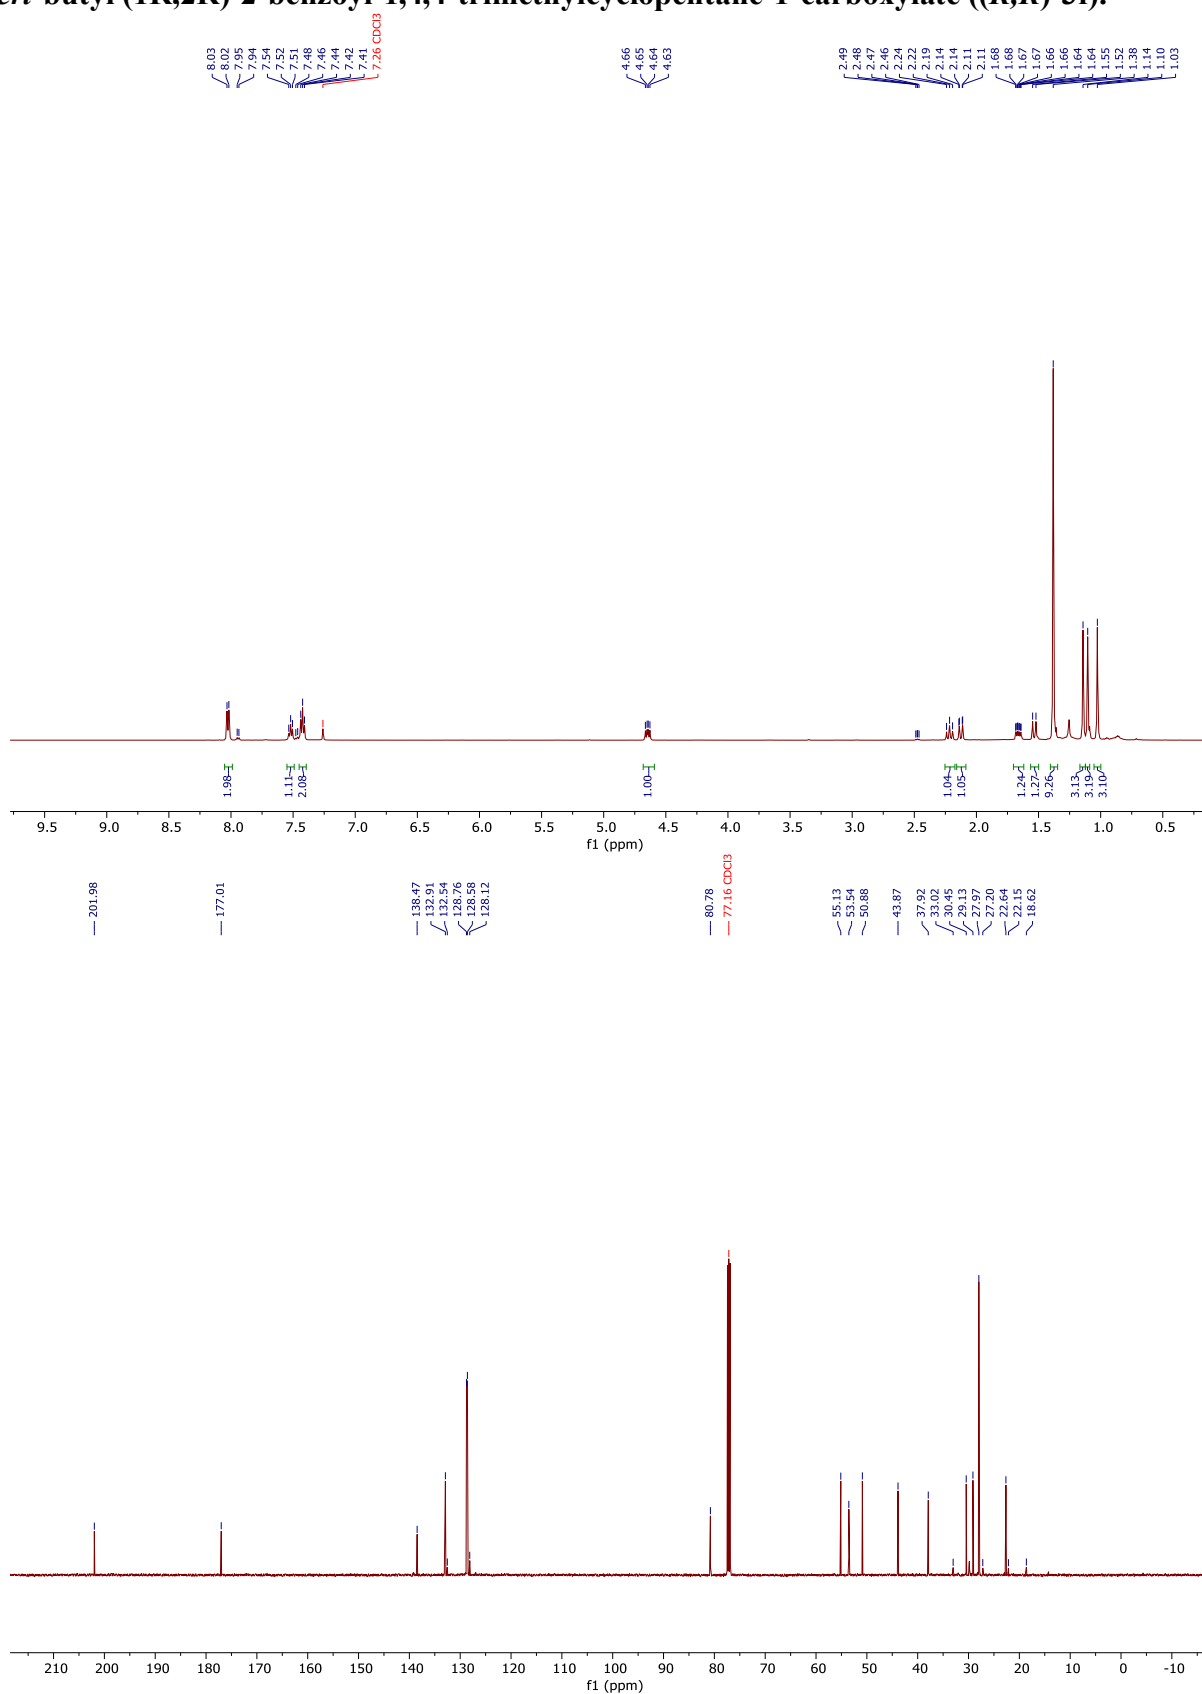

**((1*S*,2*R*)-4,4-dimethyl-2-(phenylsulfonyl)cyclopentyl)(phenyl)methanone ((*R,R*)-3g).**

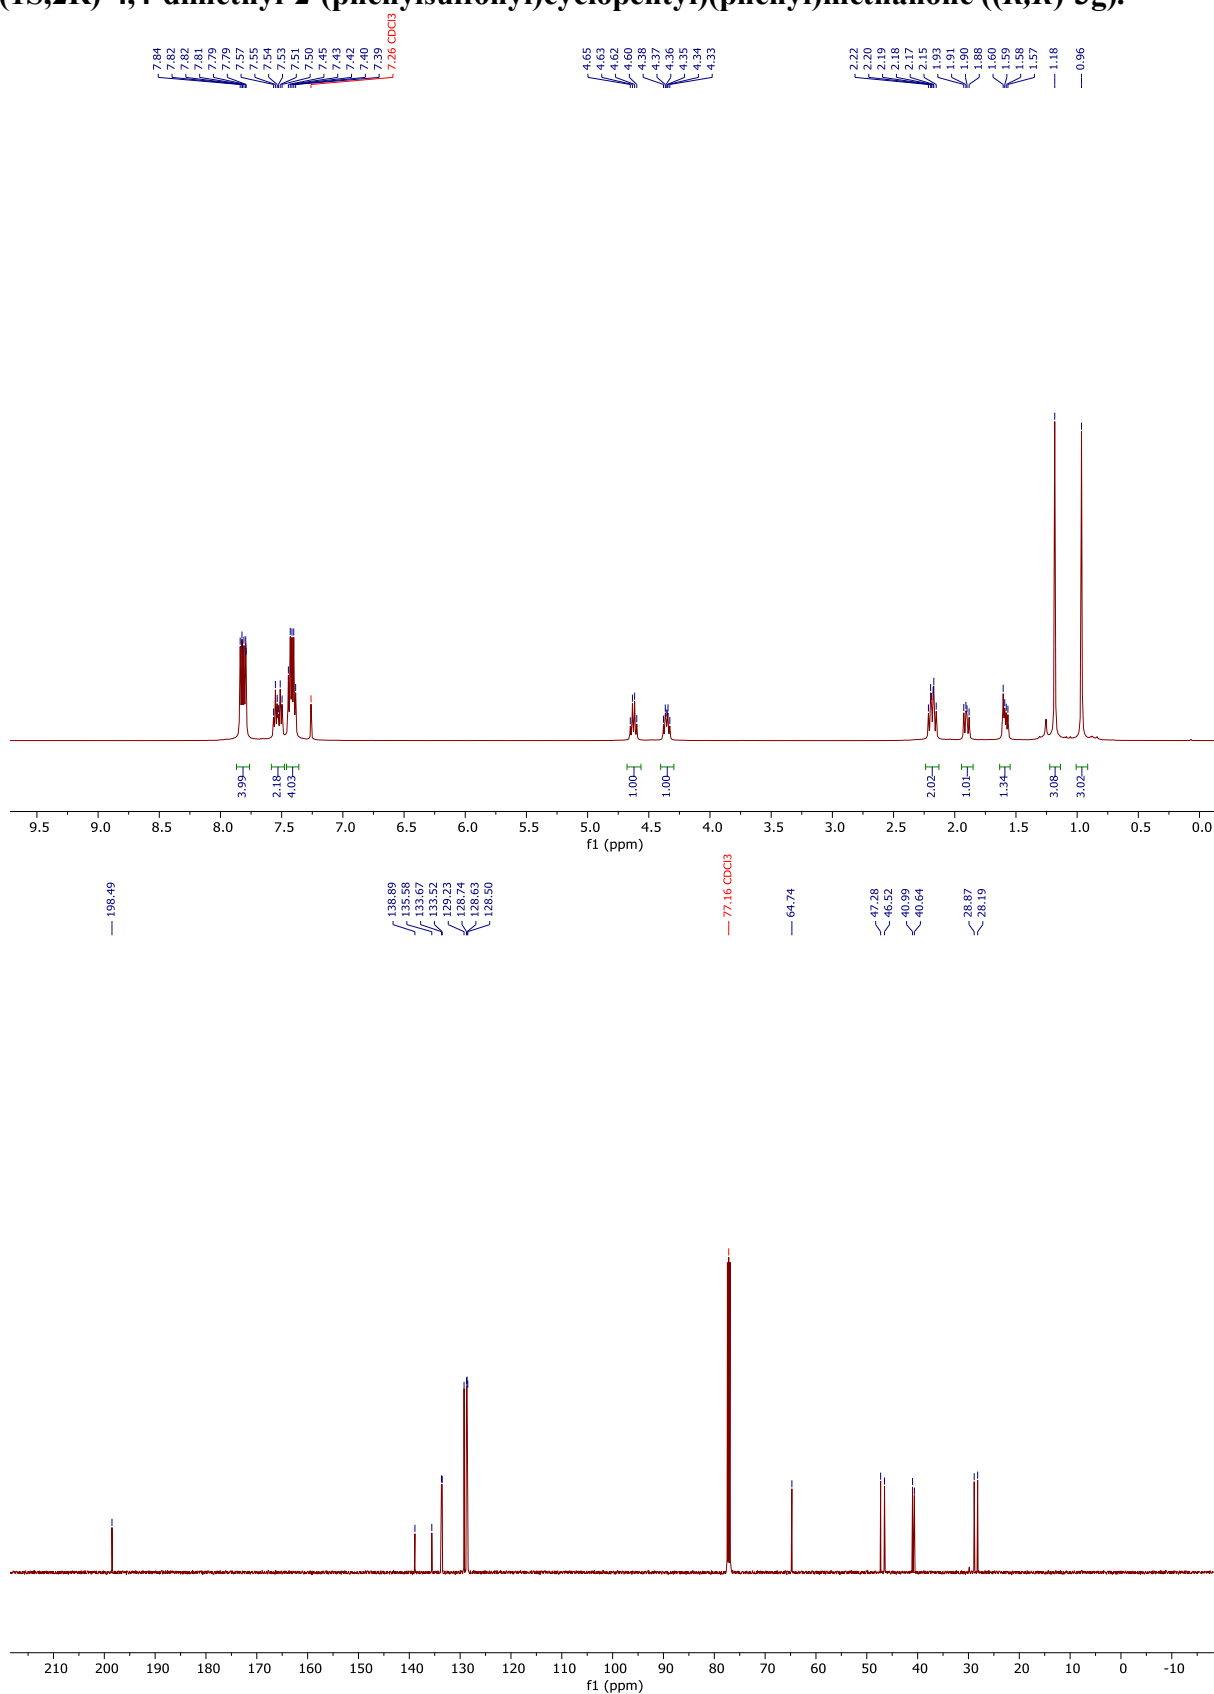



**((1R,2R)-4,4-dimethyl-2-(4,4,5,5-tetramethyl-1,3,2-dioxaborolan-2-yl)cyclopentyl)(phenyl)methanone ((R,R)-3h).**

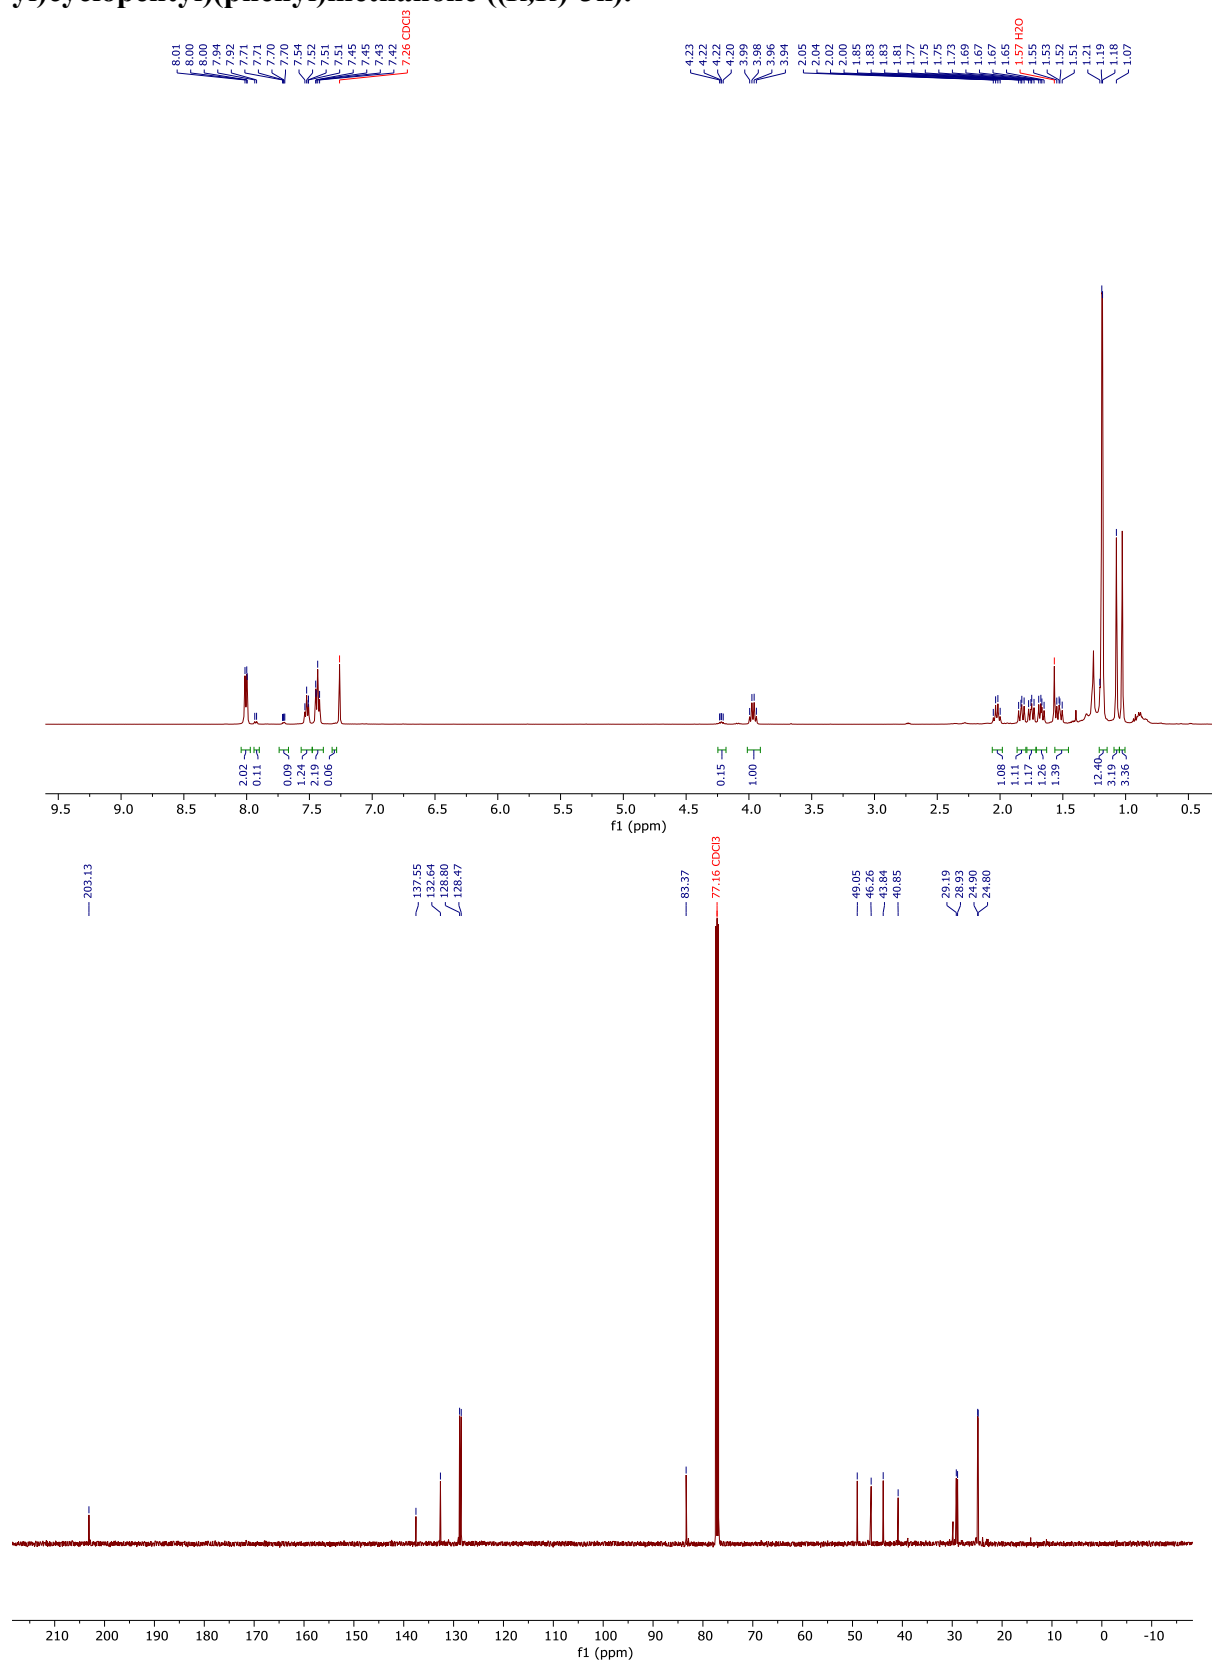

**(1R,2R)-2-benzoyl-4,4-dimethylcyclopentane-1-carbonitrile ((R,R)-3i).**

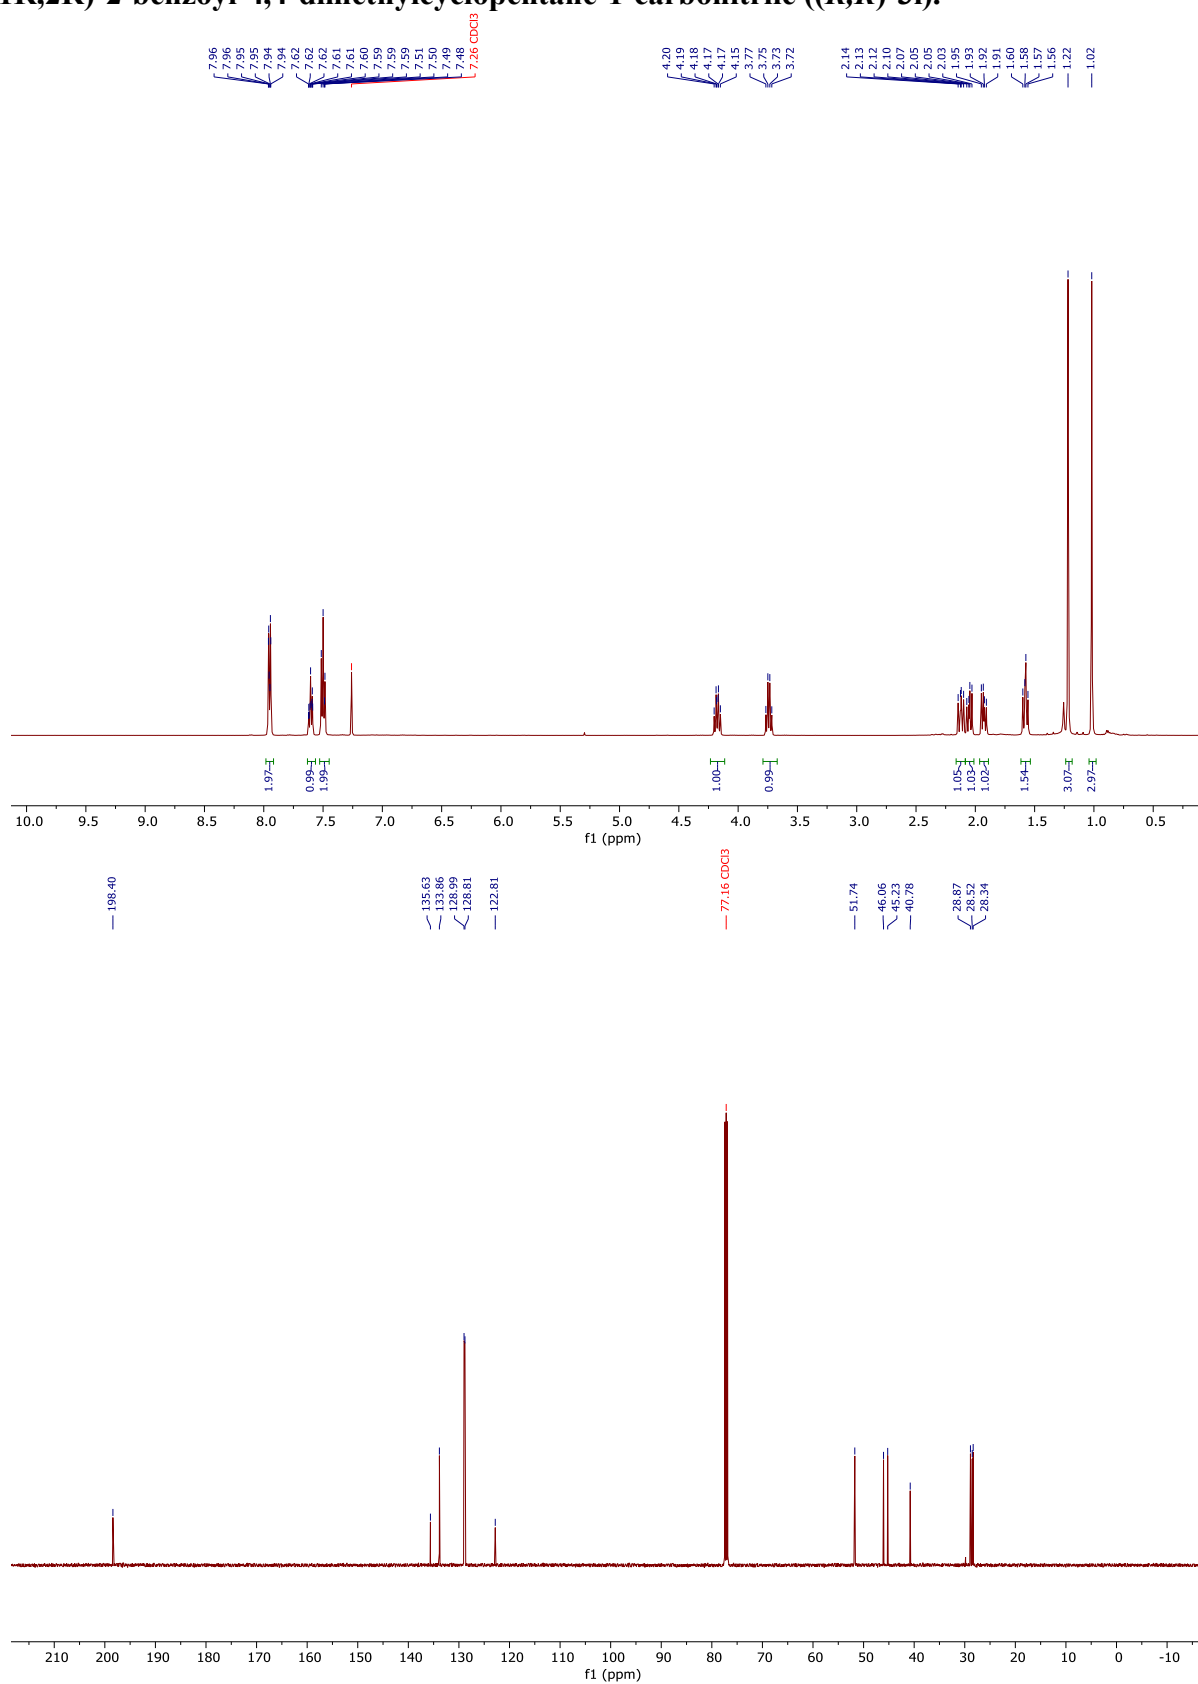

**2D ROESY spectrum of (*R,R*)-3i**

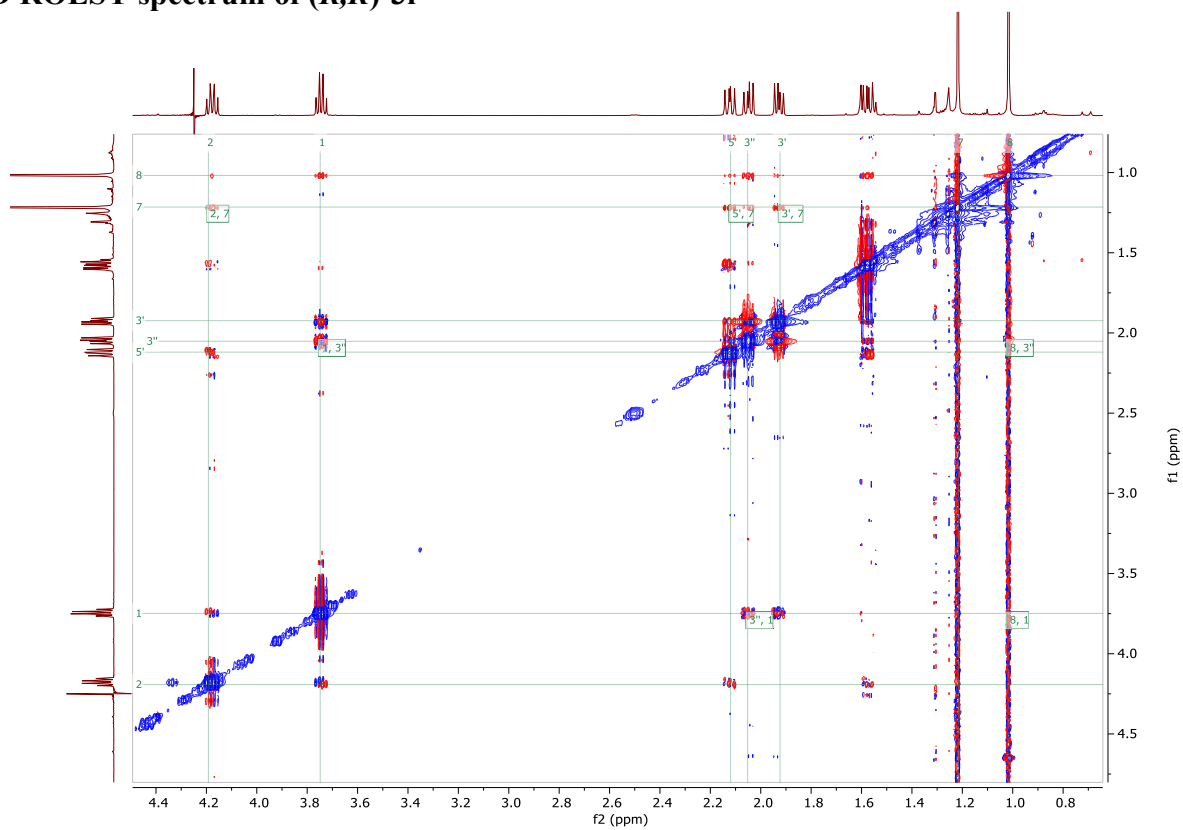

**2D HSQC spectrum of (*R,R*)-3i**

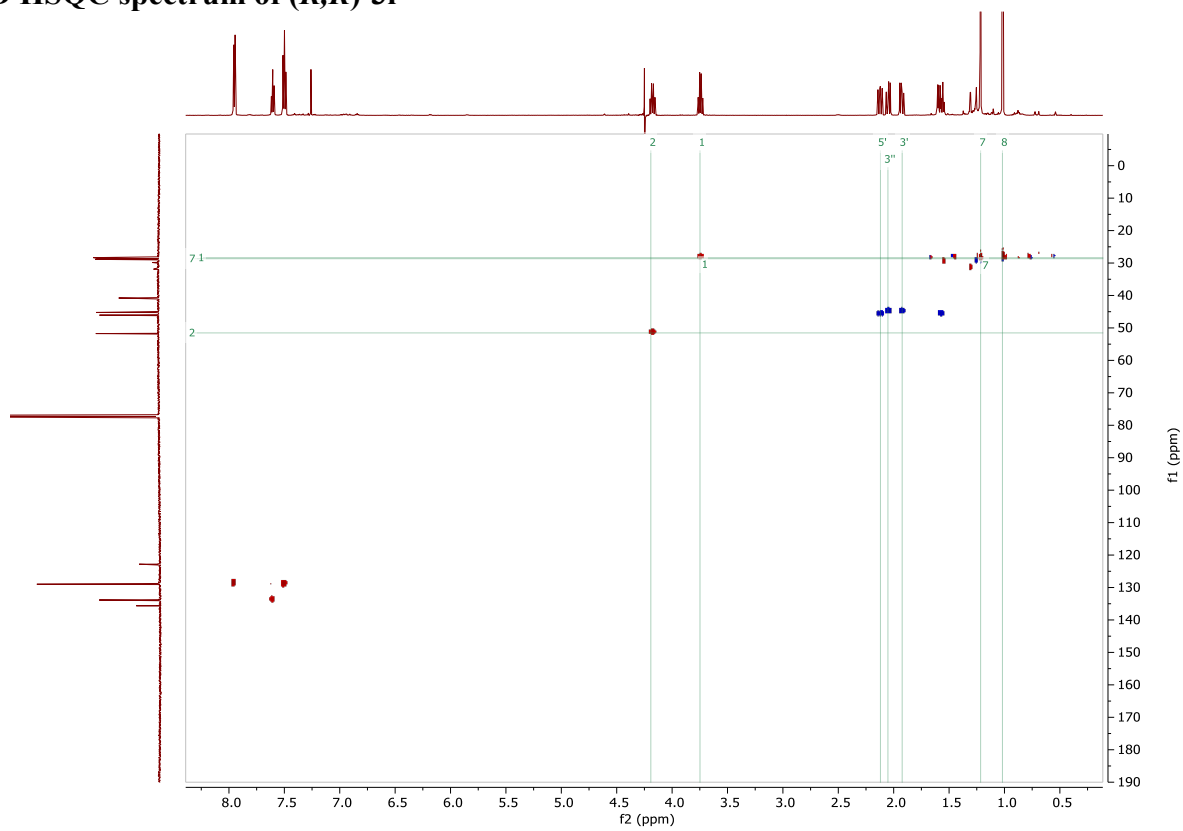

**methyl (1R,2R)-1-acetamido-2-benzoyl-4,4-dimethylcyclopentane-1-carboxylate ((R,R)-3j).**

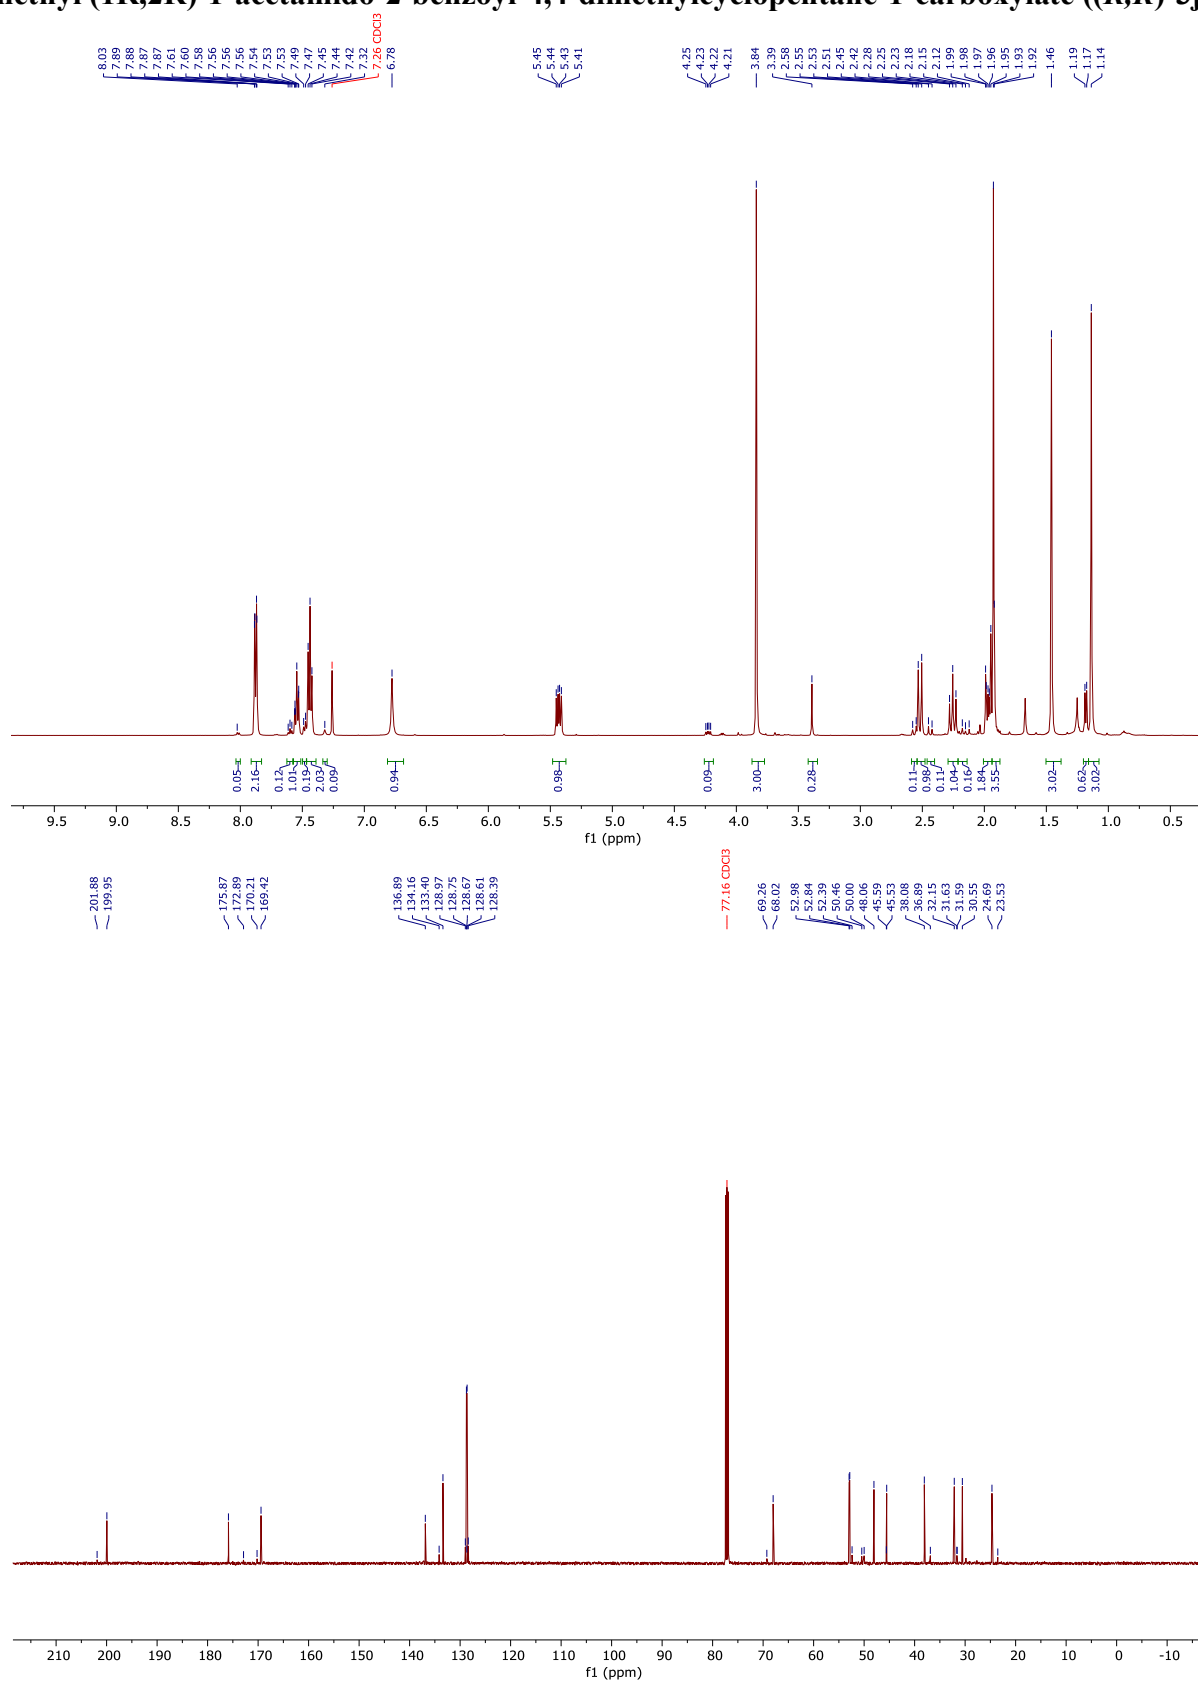

2D ROESY spectrum of (*R,R*)-3j

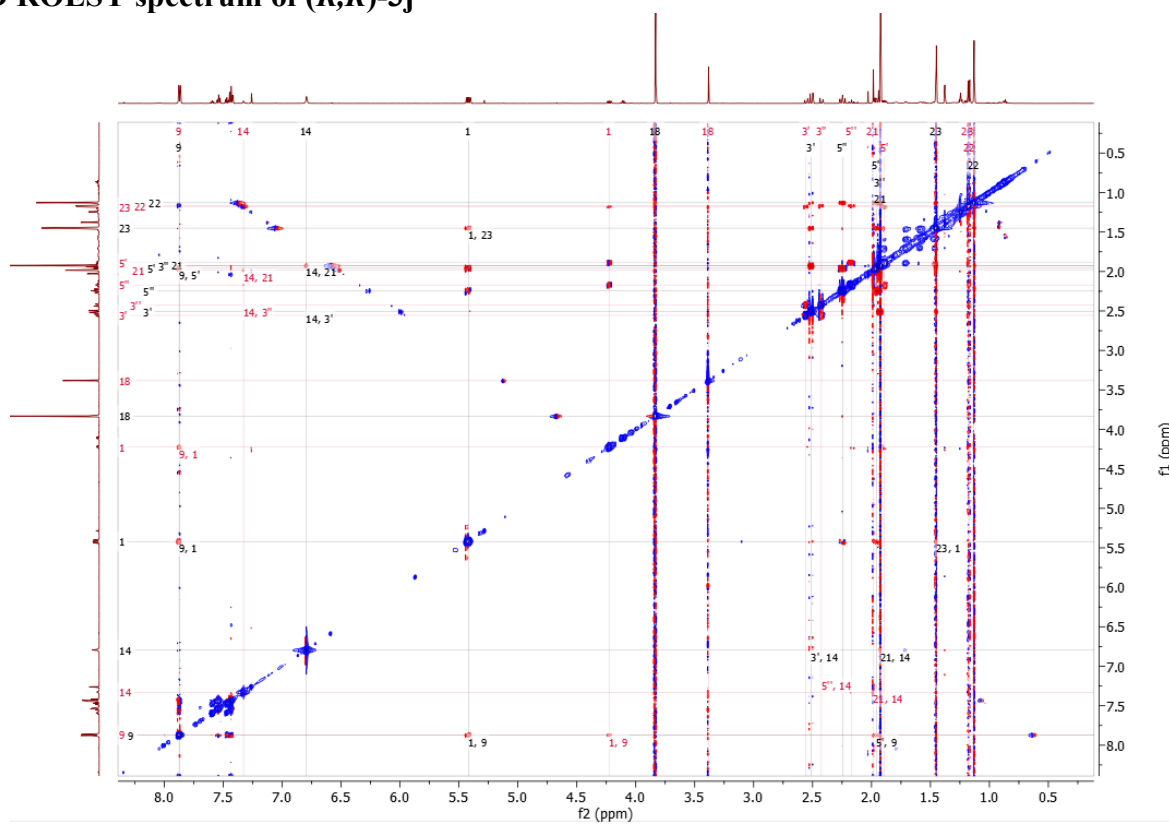

2D ROESY spectrum of (*R,R*)-3j (zoomed in key region)

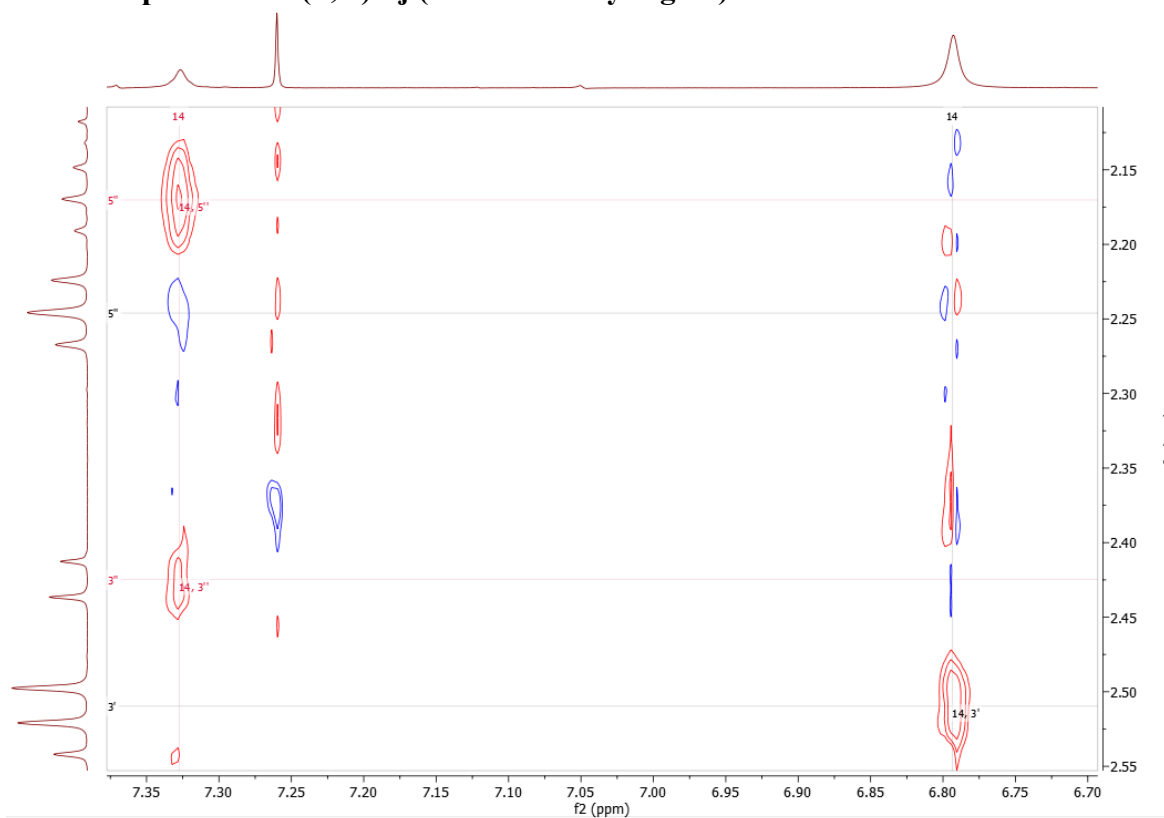

## 2D HSQC spectrum of (R,R)-3j

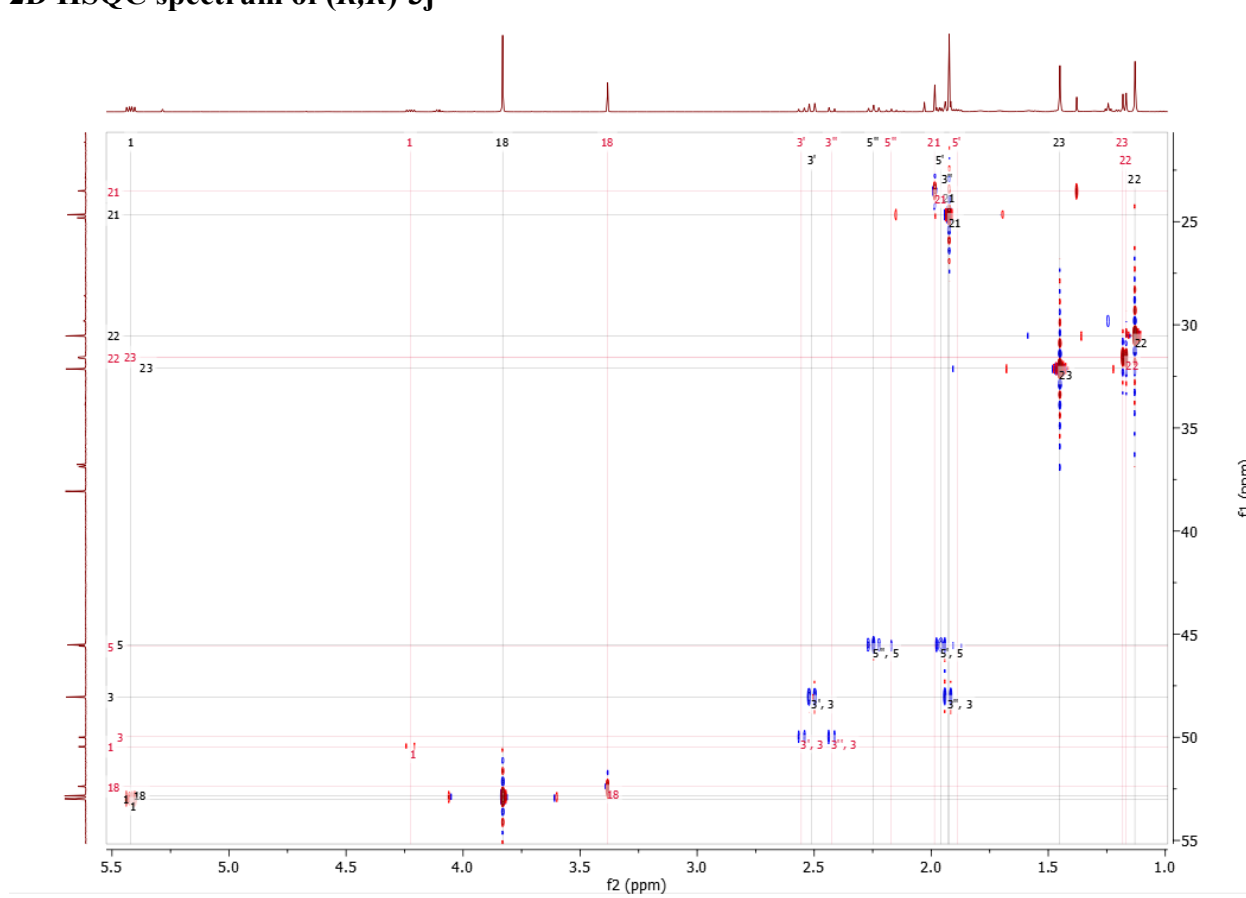

**(5S,6R)-6-benzoyl-8,8-dimethyl-2-oxaspiro[4.4]nonan-1-one ((R,R)-3k).**

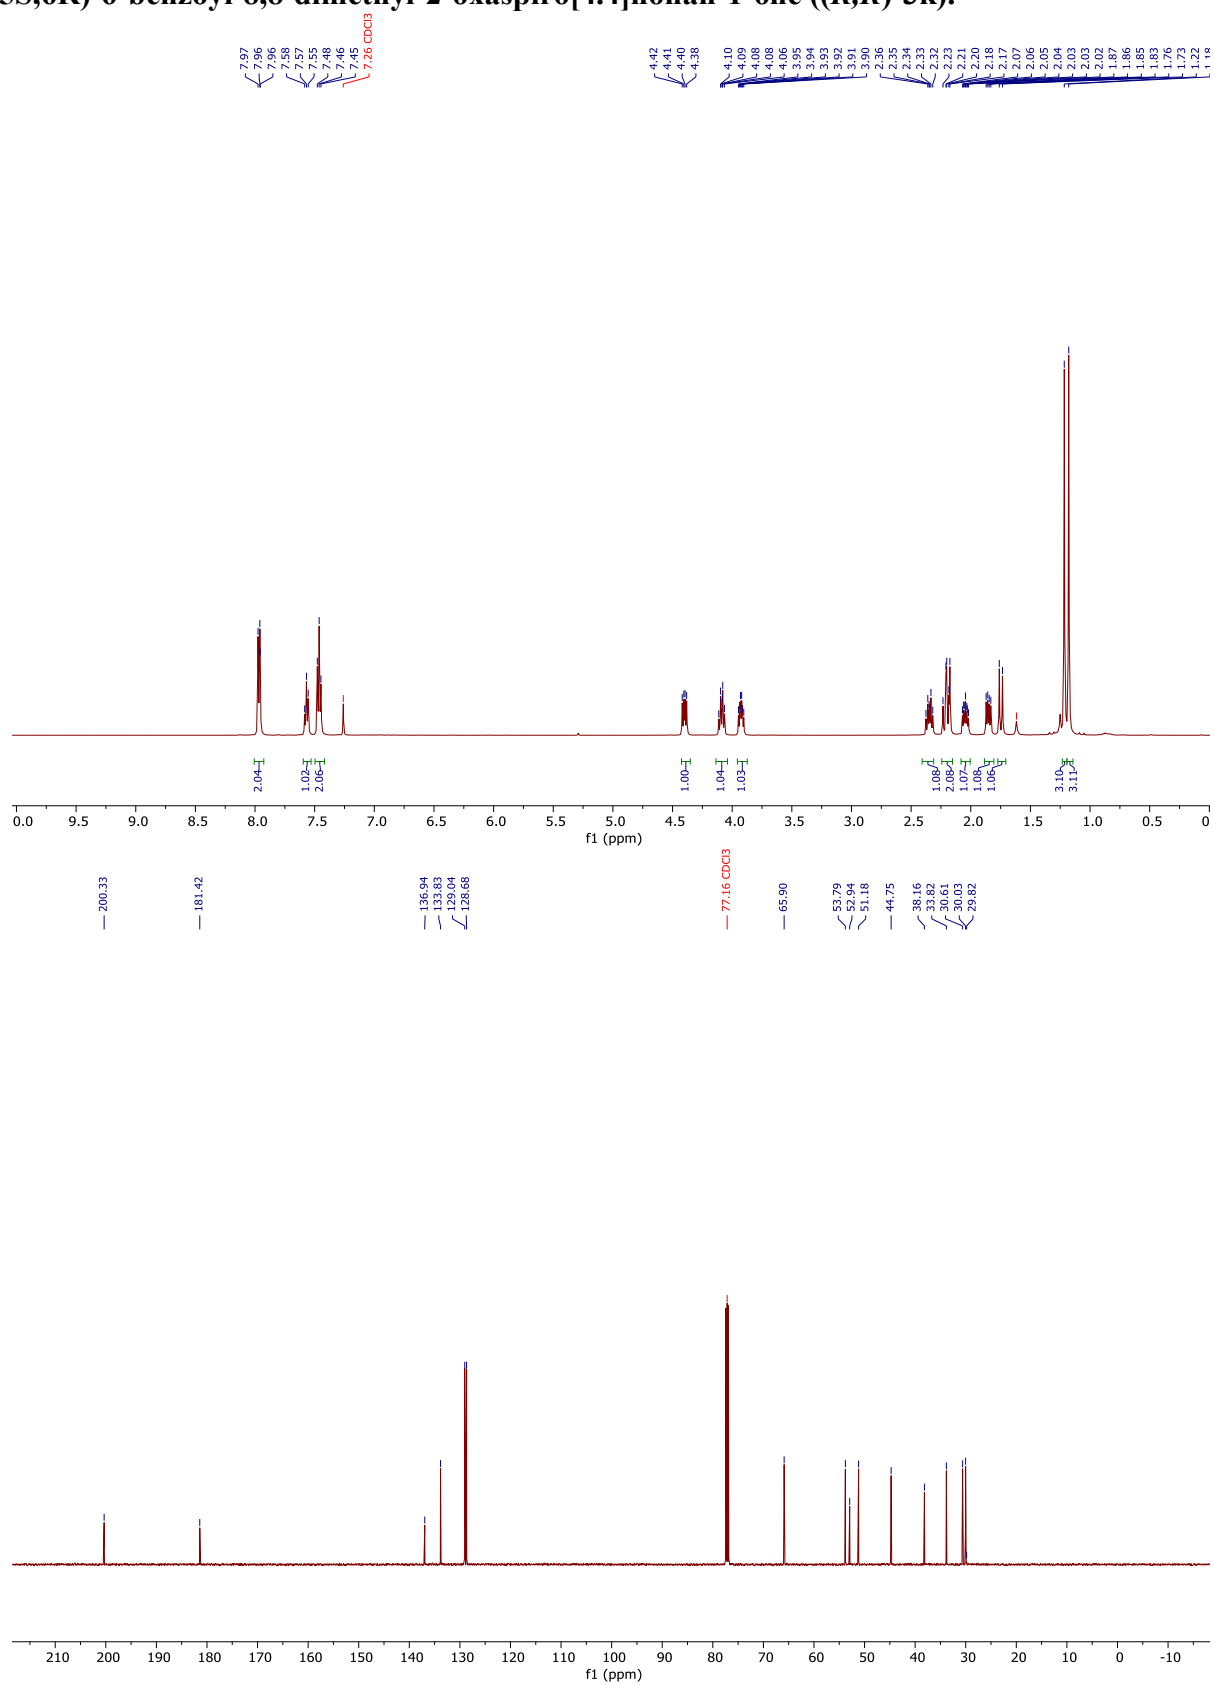

2D ROESY spectrum of (*R,R*)-3k

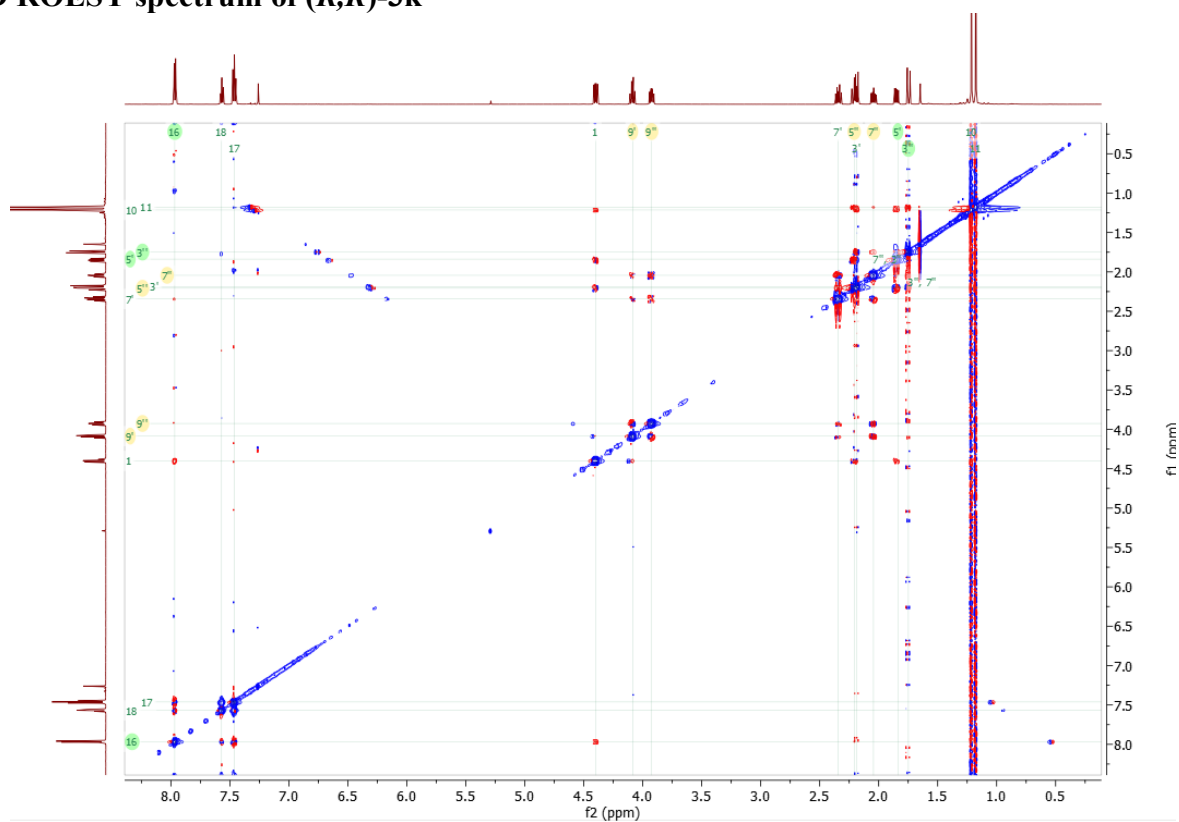

2D ROESY spectrum of (*R,R*)-3k (zoomed in key region)

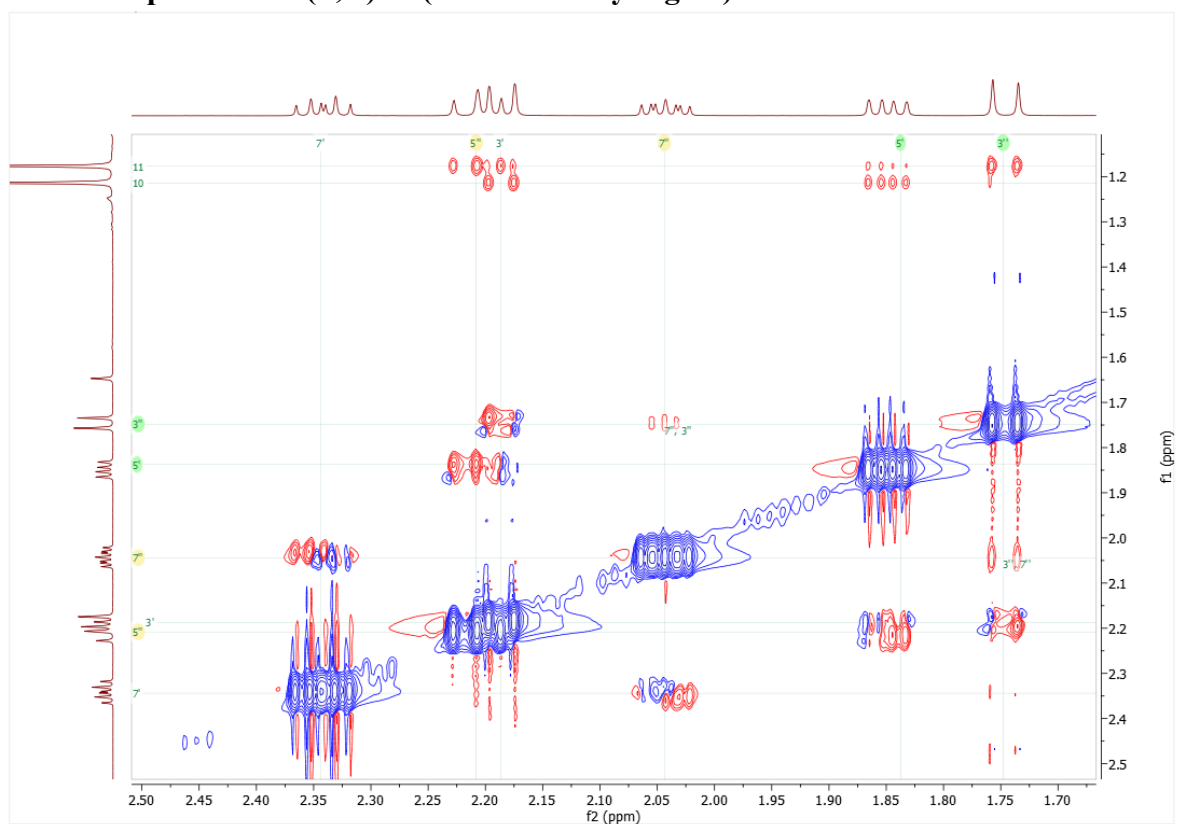



# 2D HSQC spectrum of (*R,R*)-3k

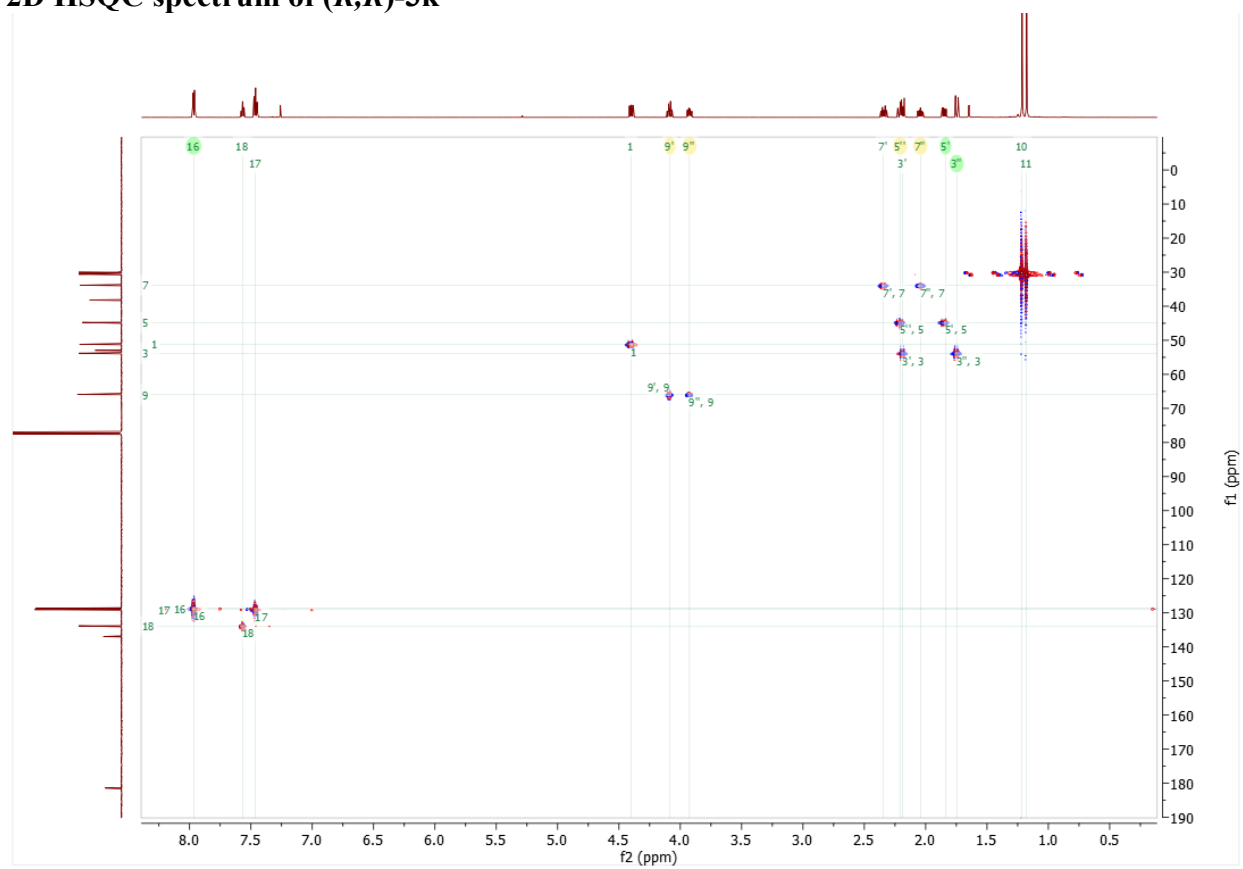

**((1R,2R)-4,4-dimethyl-2-(pyridin-2-yl)cyclopentyl)(phenyl)methanone ((R,R)-3I).**

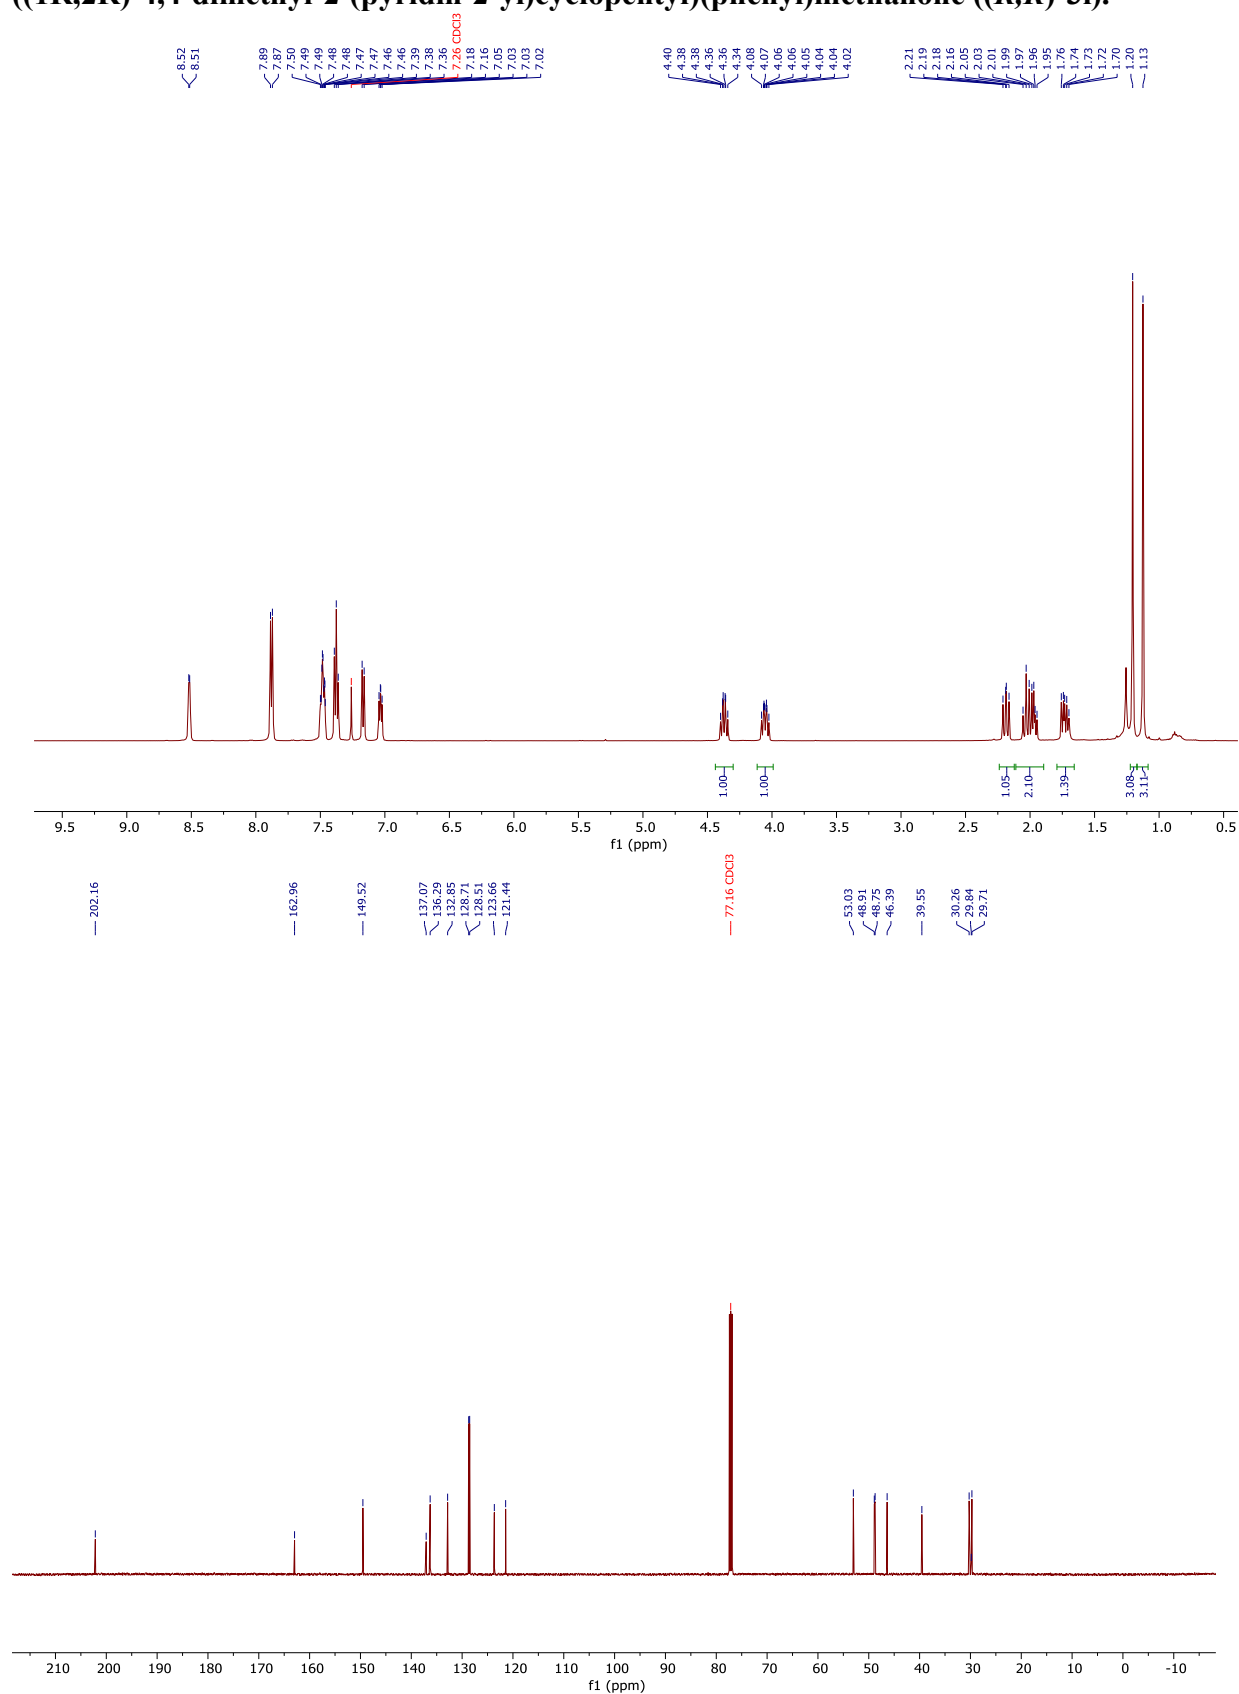

**(R)-(4,4-dimethyl-2,2-diphenylcyclopentyl)(phenyl)methanone ((R,R)-3m).**

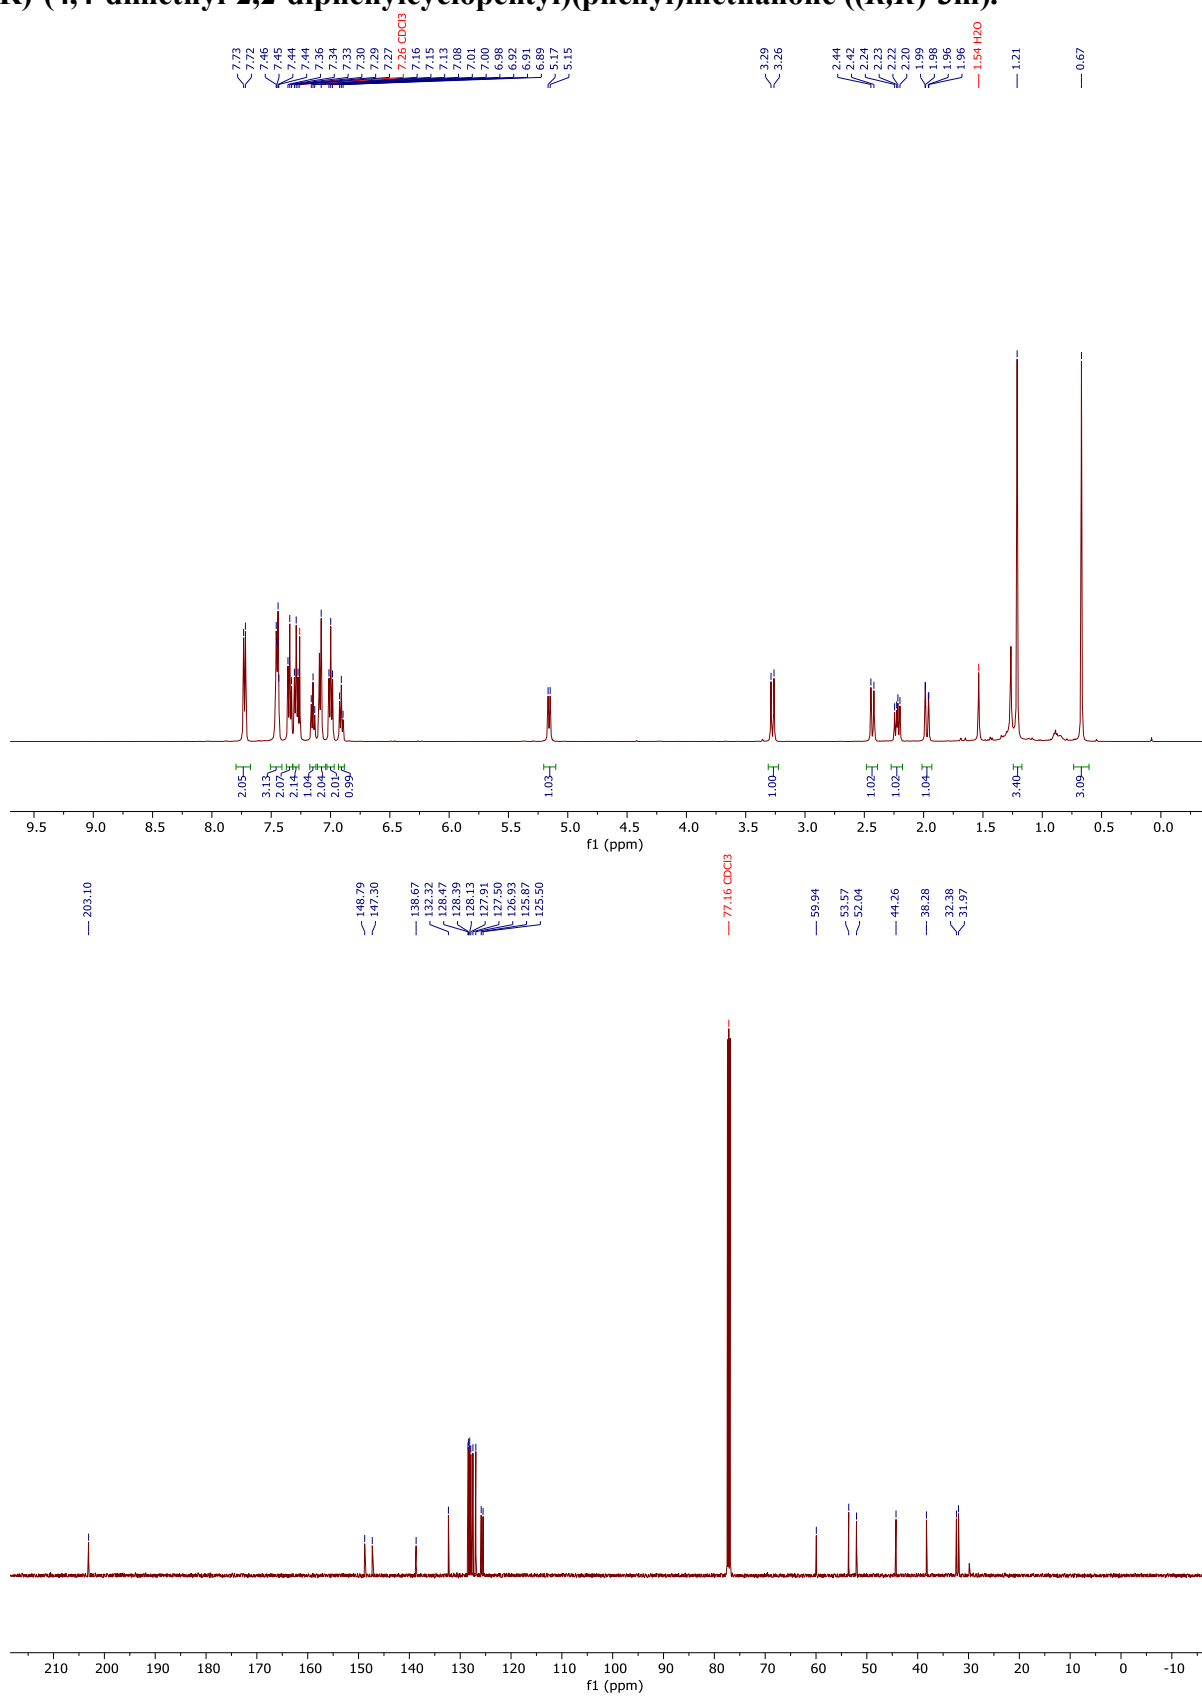

## Section 10. HPLC traces

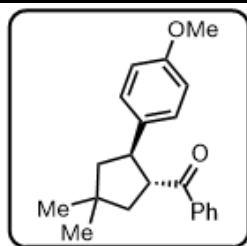

**((R,R)-3a)**

Racemic

mAU

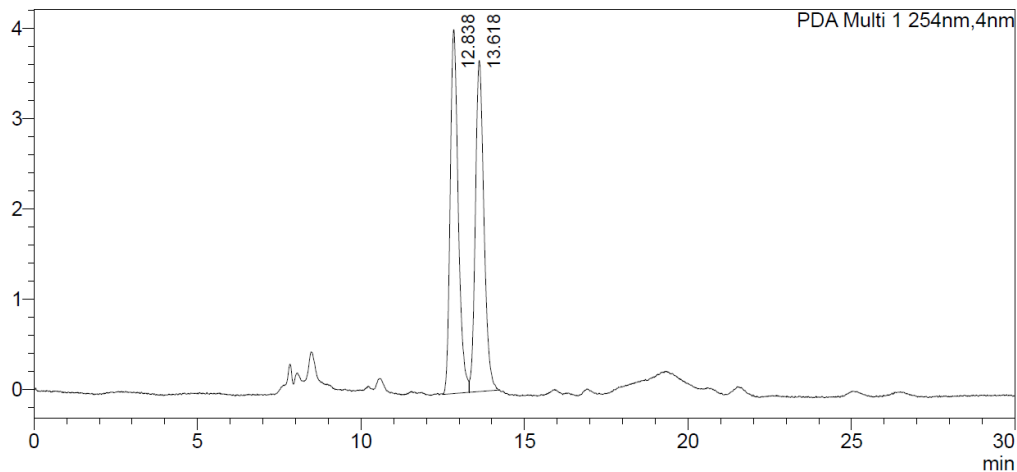

### <Peak Table>

PDA Ch1 254nm

| Peak# | Ret. Time | Area   | Height | Area%   |
|-------|-----------|--------|--------|---------|
| 1     | 12.838    | 68968  | 4025   | 50.792  |
| 2     | 13.618    | 66817  | 3664   | 49.208  |
| Total |           | 135785 | 7689   | 100.000 |

Scalemic with (*S,S*)-4e

mAU

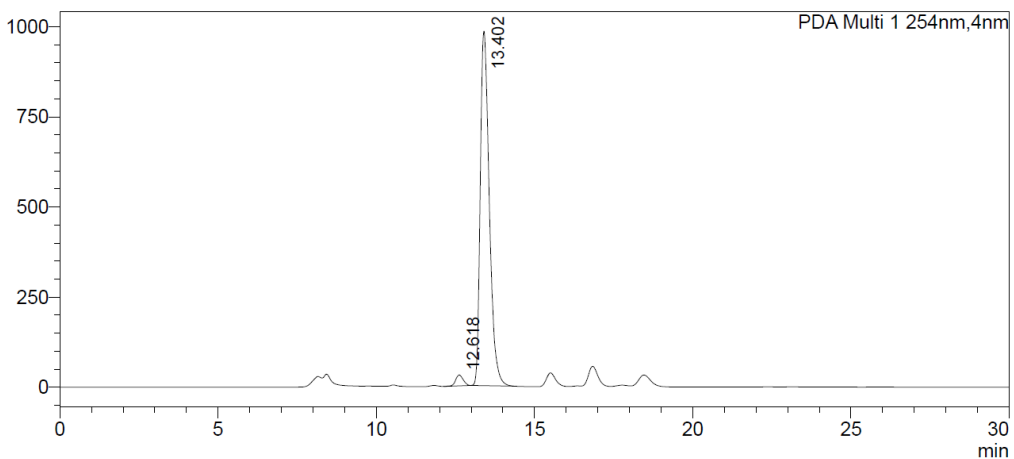

### <Peak Table>

PDA Ch1 254nm

| Peak# | Ret. Time | Area     | Height  | Area%   |
|-------|-----------|----------|---------|---------|
| 1     | 12.618    | 503414   | 30282   | 2.514   |
| 2     | 13.402    | 19520273 | 983155  | 97.486  |
| Total |           | 20023688 | 1013437 | 100.000 |

# Scalemic with (S,S)-4a

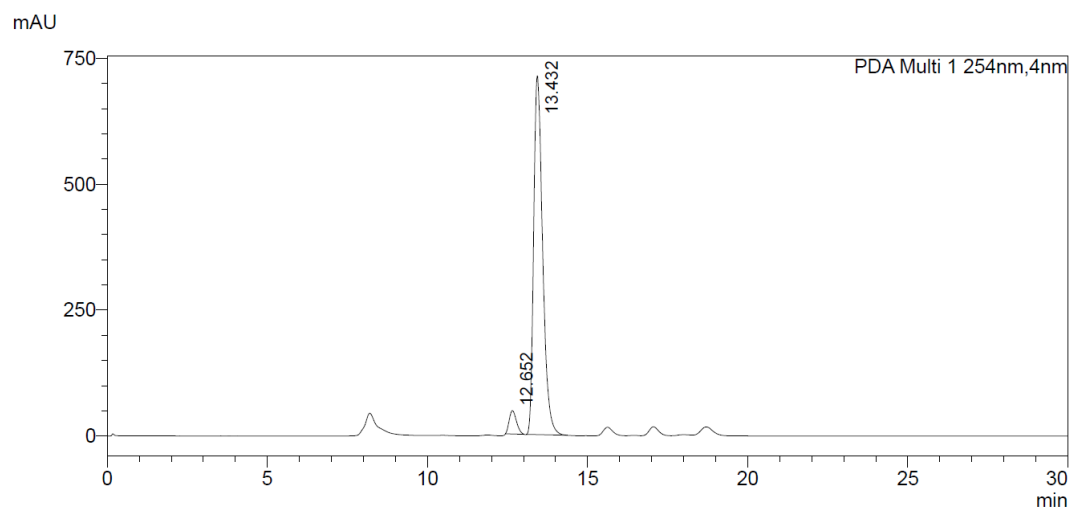

## <Peak Table>

PDA Ch1 254nm

| Peak# | Ret. Time | Area     | Height | Area%   |
|-------|-----------|----------|--------|---------|
| 1     | 12.652    | 726534   | 46361  | 4.976   |
| 2     | 13.432    | 13873141 | 712957 | 95.024  |
| Total |           | 14599675 | 759319 | 100.000 |

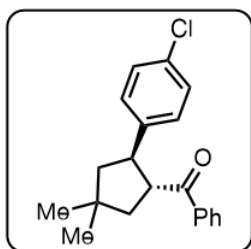

**((R,R)-3b)**

Racemic

mAU

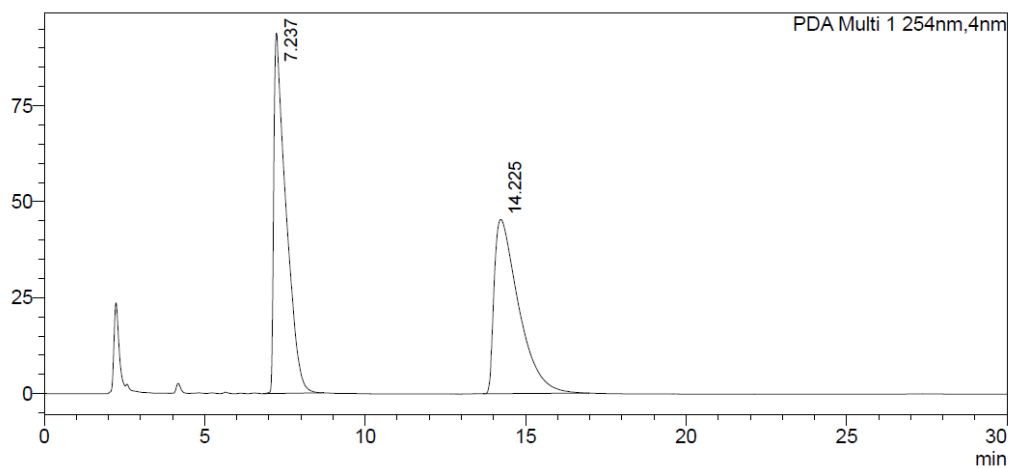

**<Peak Table>**

PDA Ch1 254nm

| Peak# | Ret. Time | Area    | Height | Area%   |
|-------|-----------|---------|--------|---------|
| 1     | 7.237     | 2482125 | 93918  | 50.756  |
| 2     | 14.225    | 2408200 | 45390  | 49.244  |
| Total |           | 4890324 | 139309 | 100.000 |

Scalemic with (*S,S*)-4e

mAU

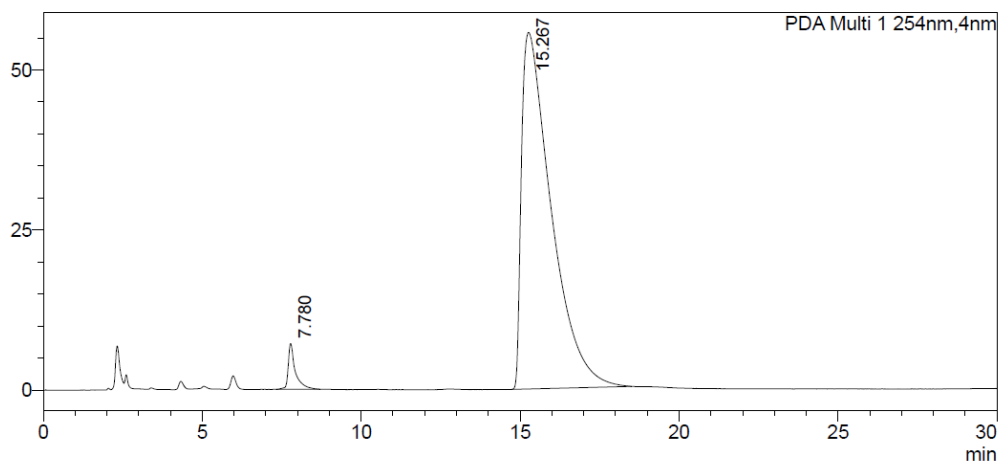

**<Peak Table>**

PDA Ch1 254nm

| Peak# | Ret. Time | Area    | Height | Area%   |
|-------|-----------|---------|--------|---------|
| 1     | 7.780     | 109878  | 7142   | 2.951   |
| 2     | 15.267    | 3614081 | 55647  | 97.049  |
| Total |           | 3723959 | 62789  | 100.000 |

Scalemic with (*S,S*)-4a

mAU

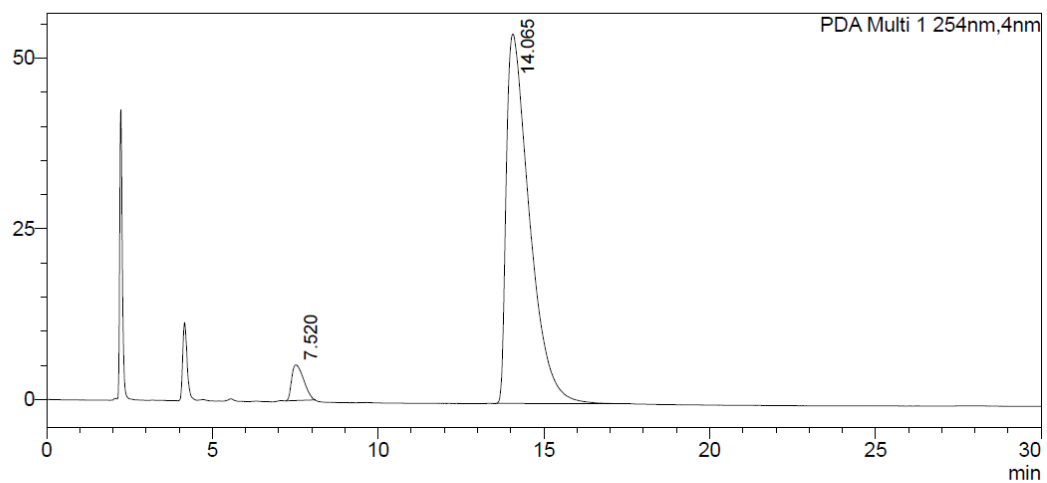

**<Peak Table>**

PDA Ch1 254nm

| Peak# | Ret. Time | Area    | Height | Area%   |
|-------|-----------|---------|--------|---------|
| 1     | 7.520     | 130112  | 5209   | 4.719   |
| 2     | 14.065    | 2627241 | 54104  | 95.281  |
| Total |           | 2757352 | 59313  | 100.000 |

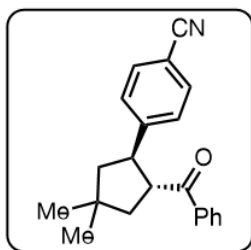

**((R,R)-3d)**

Racemic  
mAU

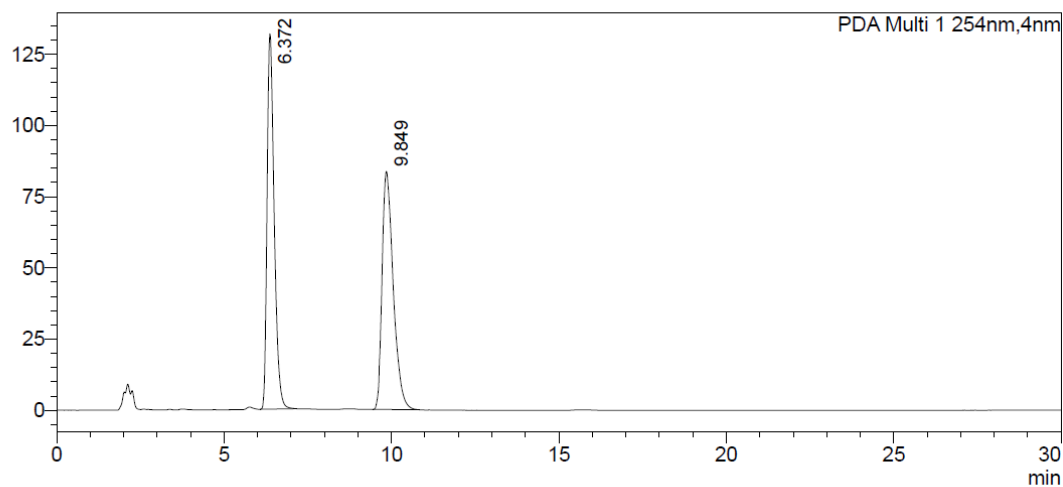

**<Peak Table>**

PDA Ch1 254nm

| Peak# | Ret. Time | Area    | Height | Area%   |
|-------|-----------|---------|--------|---------|
| 1     | 6.372     | 1943628 | 131762 | 50.085  |
| 2     | 9.849     | 1936996 | 83542  | 49.915  |
| Total |           | 3880624 | 215304 | 100.000 |

Scalemic with (S,S)-4e

mAU

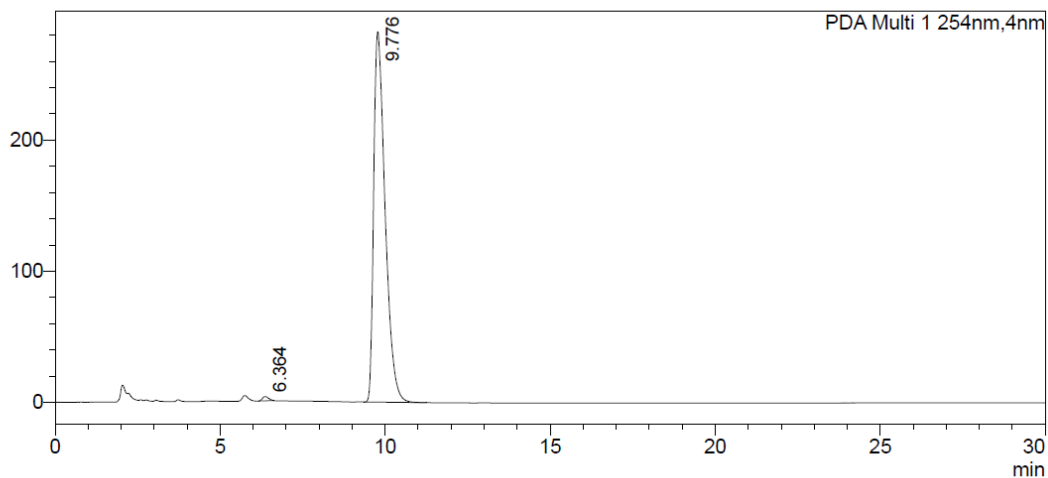

**<Peak Table>**

PDA Ch1 254nm

| Peak# | Ret. Time | Area    | Height | Area%   |
|-------|-----------|---------|--------|---------|
| 1     | 6.364     | 41405   | 3246   | 0.605   |
| 2     | 9.776     | 6798515 | 282477 | 99.395  |
| Total |           | 6839919 | 285723 | 100.000 |



# Scalemic with (S,S)-4a

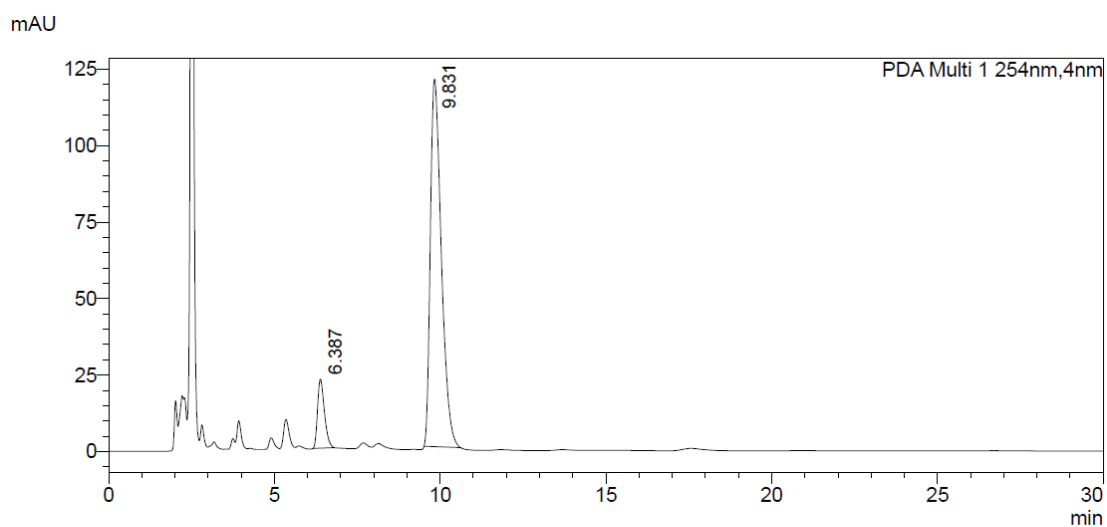

## <Peak Table>

PDA Ch1 254nm

| Peak# | Ret. Time | Area    | Height | Area%   |
|-------|-----------|---------|--------|---------|
| 1     | 6.387     | 325002  | 22539  | 10.513  |
| 2     | 9.831     | 2766375 | 120225 | 89.487  |
| Total |           | 3091377 | 142765 | 100.000 |

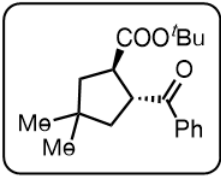

**((R,R)-3e)**

Racemic  
mAU

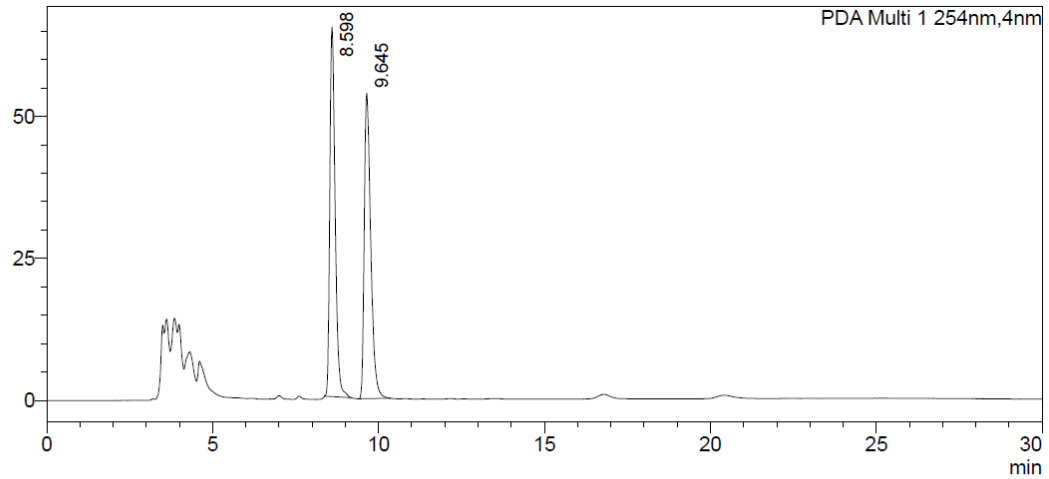

**<Peak Table>**

PDA Ch1 254nm

| Peak# | Ret. Time | Area    | Height | Area%   |
|-------|-----------|---------|--------|---------|
| 1     | 8.598     | 728058  | 64933  | 49.958  |
| 2     | 9.645     | 729291  | 53662  | 50.042  |
| Total |           | 1457349 | 118595 | 100.000 |

Scalemic with (*S,S*)-4e  
mAU

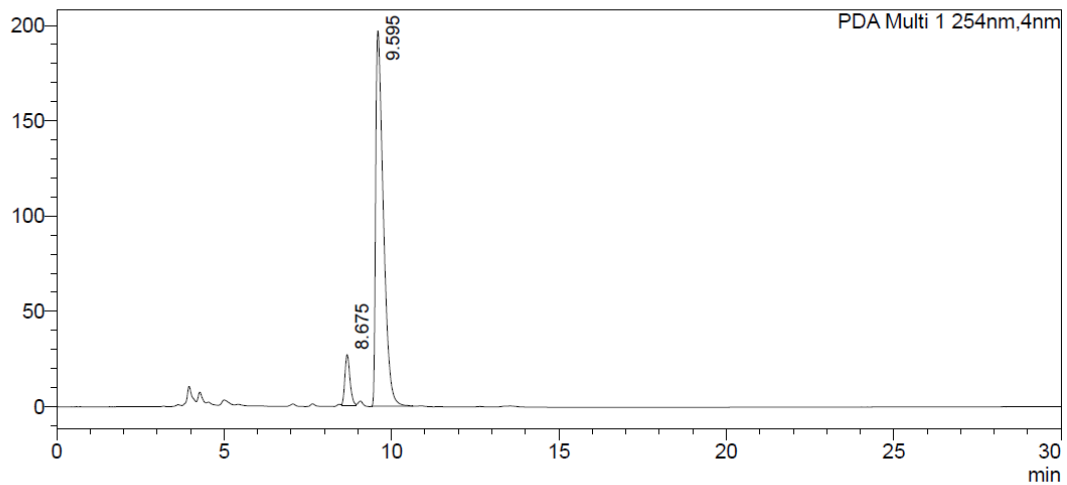

**<Peak Table>**

PDA Ch1 254nm

| Peak# | Ret. Time | Area    | Height | Area%   |
|-------|-----------|---------|--------|---------|
| 1     | 8.675     | 286737  | 26826  | 8.346   |
| 2     | 9.595     | 3148756 | 196920 | 91.654  |
| Total |           | 3435493 | 223746 | 100.000 |

# Scalemic with (S,S)-4a

mAU

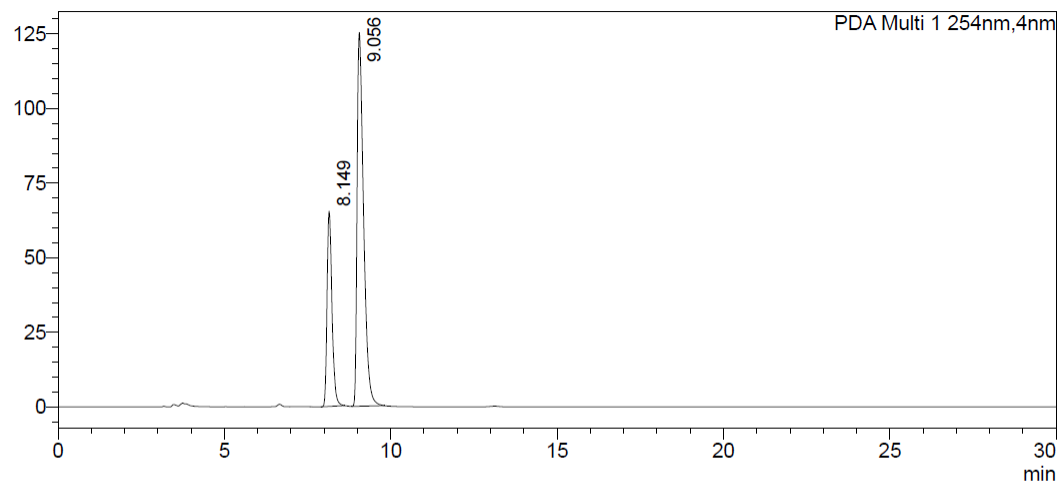

## <Peak Table>

PDA Ch1 254nm

| Peak# | Ret. Time | Area    | Height | Area%   |
|-------|-----------|---------|--------|---------|
| 1     | 8.149     | 674306  | 65436  | 28.438  |
| 2     | 9.056     | 1696805 | 125271 | 71.562  |
| Total |           | 2371111 | 190708 | 100.000 |

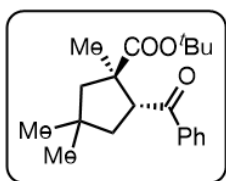

**((R,R)-3f)**

Racemic  
mAU

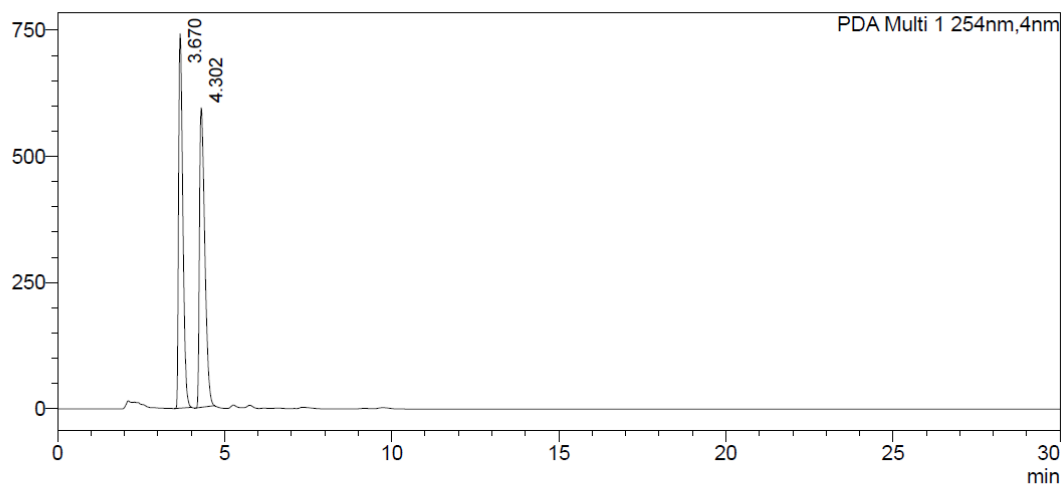

**<Peak Table>**

PDA Ch1 254nm

| Peak# | Ret. Time | Area     | Height  | Area%   |
|-------|-----------|----------|---------|---------|
| 1     | 3.670     | 6521074  | 741765  | 49.722  |
| 2     | 4.302     | 6594006  | 592959  | 50.278  |
| Total |           | 13115080 | 1334724 | 100.000 |

Scalemic with (*S,S*)-4e

mAU

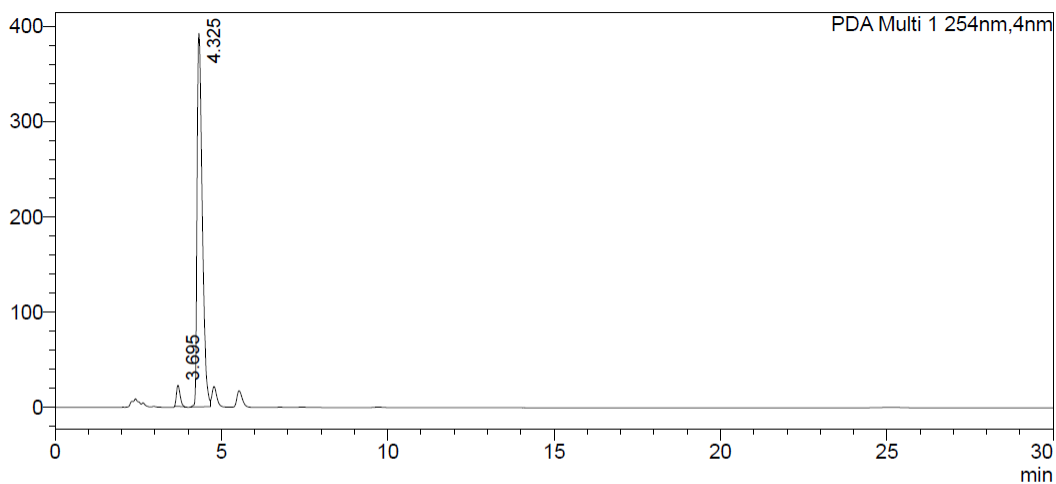

**<Peak Table>**

PDA Ch1 254nm

| Peak# | Ret. Time | Area    | Height | Area%   |
|-------|-----------|---------|--------|---------|
| 1     | 3.695     | 169268  | 22107  | 3.818   |
| 2     | 4.325     | 4264556 | 392002 | 96.182  |
| Total |           | 4433824 | 414109 | 100.000 |

# Scalemic with (S,S)-4a

mAU

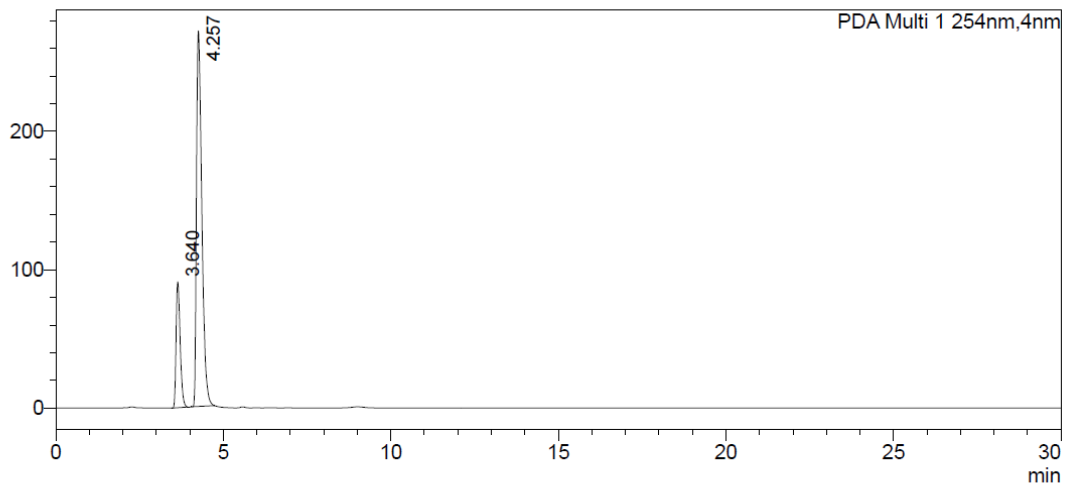

## <Peak Table>

PDA Ch1 254nm

| Peak# | Ret. Time | Area    | Height | Area%   |
|-------|-----------|---------|--------|---------|
| 1     | 3.640     | 770593  | 90916  | 20.299  |
| 2     | 4.257     | 3025543 | 271397 | 79.701  |
| Total |           | 3796136 | 362313 | 100.000 |

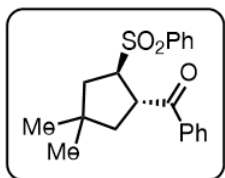

**((R,R)-3g)**

Racemic  
mAU

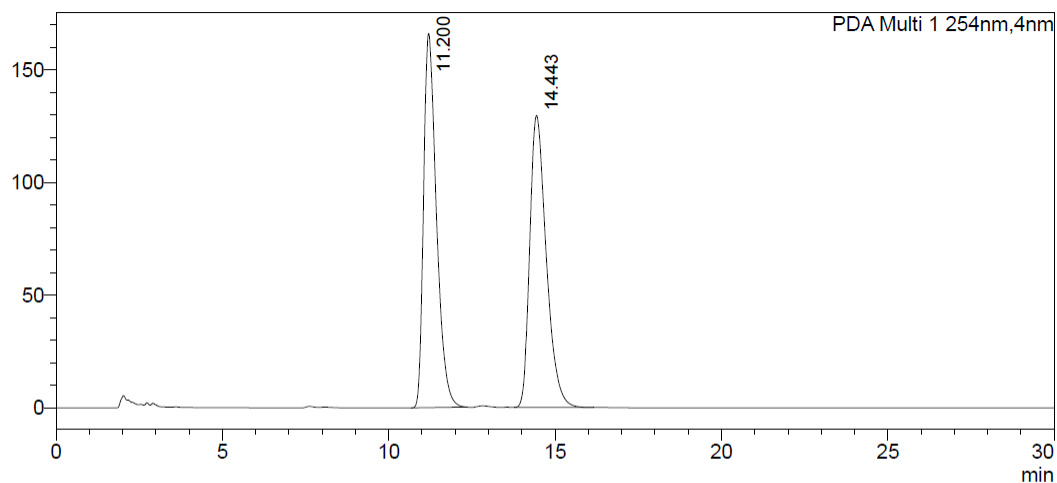

**<Peak Table>**

PDA Ch1 254nm

| Peak# | Ret. Time | Area    | Height | Area%   |
|-------|-----------|---------|--------|---------|
| 1     | 11.200    | 4462641 | 165995 | 49.994  |
| 2     | 14.443    | 4463677 | 129537 | 50.006  |
| Total |           | 8926318 | 295532 | 100.000 |

Scalemic with (*S,S*)-4e  
mAU

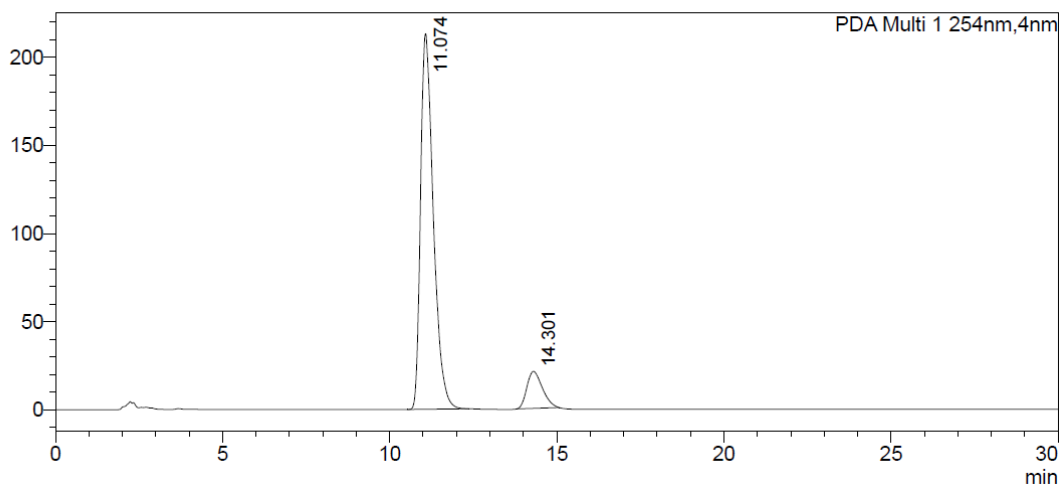

**<Peak Table>**

PDA Ch1 254nm

| Peak# | Ret. Time | Area    | Height | Area%   |
|-------|-----------|---------|--------|---------|
| 1     | 11.074    | 5670933 | 212883 | 89.377  |
| 2     | 14.301    | 673999  | 20956  | 10.623  |
| Total |           | 6344931 | 233839 | 100.000 |

# Scalemic with (S,S)-4a

mAU

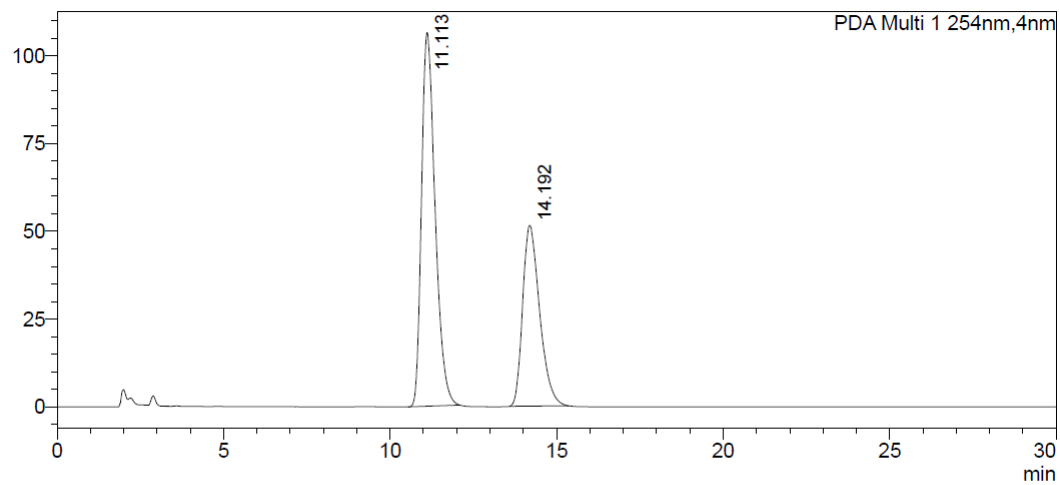

## <Peak Table>

PDA Ch1 254nm

| Peak# | Ret. Time | Area    | Height | Area%   |
|-------|-----------|---------|--------|---------|
| 1     | 11.113    | 3020968 | 106421 | 62.340  |
| 2     | 14.192    | 1825001 | 51467  | 37.660  |
| Total |           | 4845969 | 157888 | 100.000 |

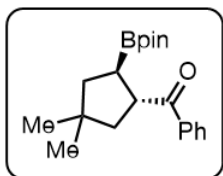

**((R,R)-3h)**

Racemic

mAU

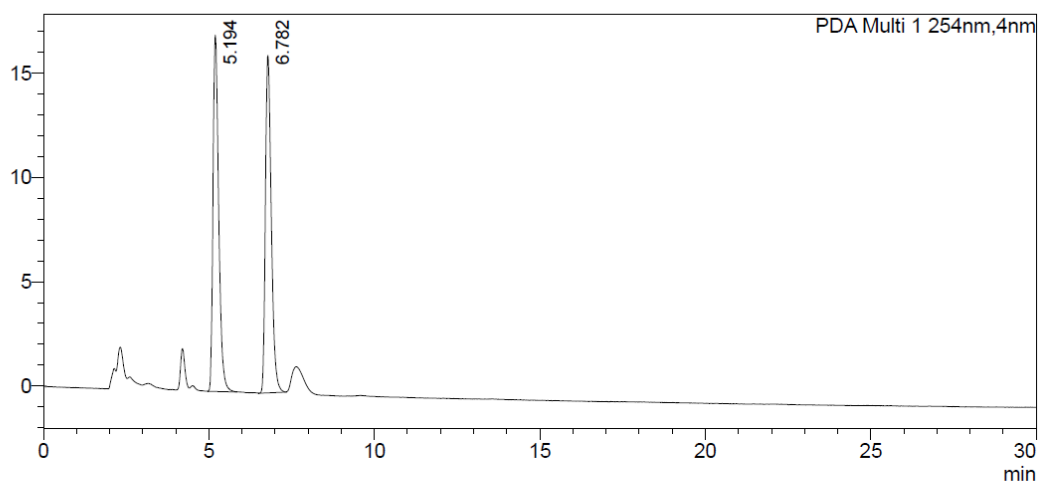

**<Peak Table>**

PDA Ch1 254nm

| Peak# | Ret. Time | Area   | Height | Area%   |
|-------|-----------|--------|--------|---------|
| 1     | 5.194     | 203303 | 17092  | 50.269  |
| 2     | 6.782     | 201124 | 16179  | 49.731  |
| Total |           | 404427 | 33271  | 100.000 |

Scalemic with (*S,S*)-4e

mAU

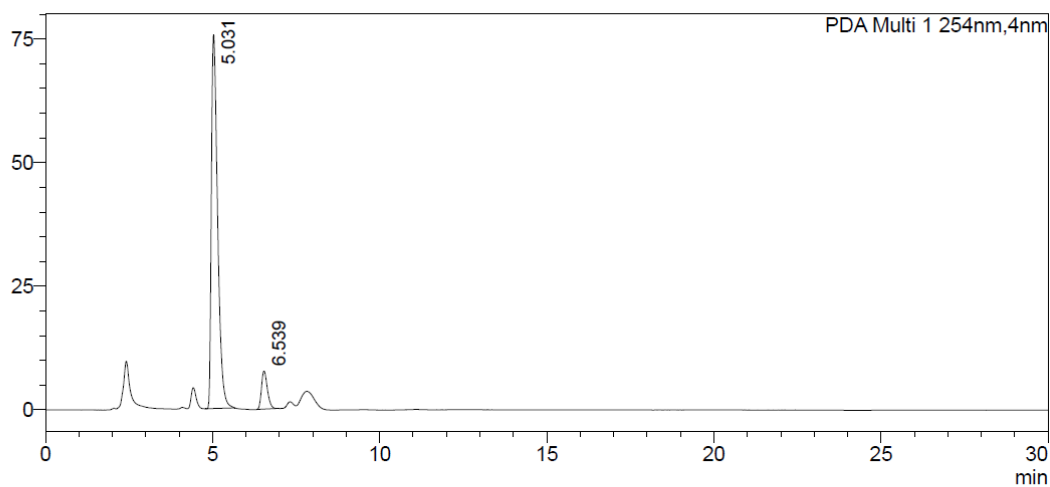

**<Peak Table>**

PDA Ch1 254nm

| Peak# | Ret. Time | Area    | Height | Area%   |
|-------|-----------|---------|--------|---------|
| 1     | 5.031     | 979355  | 75599  | 91.262  |
| 2     | 6.539     | 93772   | 7700   | 8.738   |
| Total |           | 1073128 | 83299  | 100.000 |



# Scalemic with (S,S)-4a

mAU

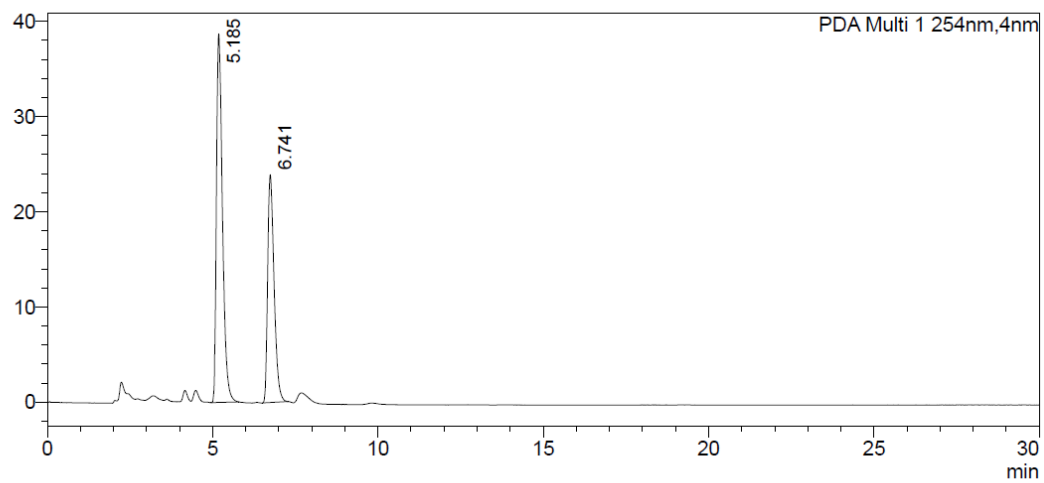

## <Peak Table>

PDA Ch1 254nm

| Peak# | Ret. Time | Area   | Height | Area%   |
|-------|-----------|--------|--------|---------|
| 1     | 5.185     | 490266 | 38703  | 60.398  |
| 2     | 6.741     | 321456 | 23914  | 39.602  |
| Total |           | 811722 | 62617  | 100.000 |

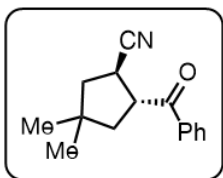

**((R,R)-3i)**

Racemic  
mAU

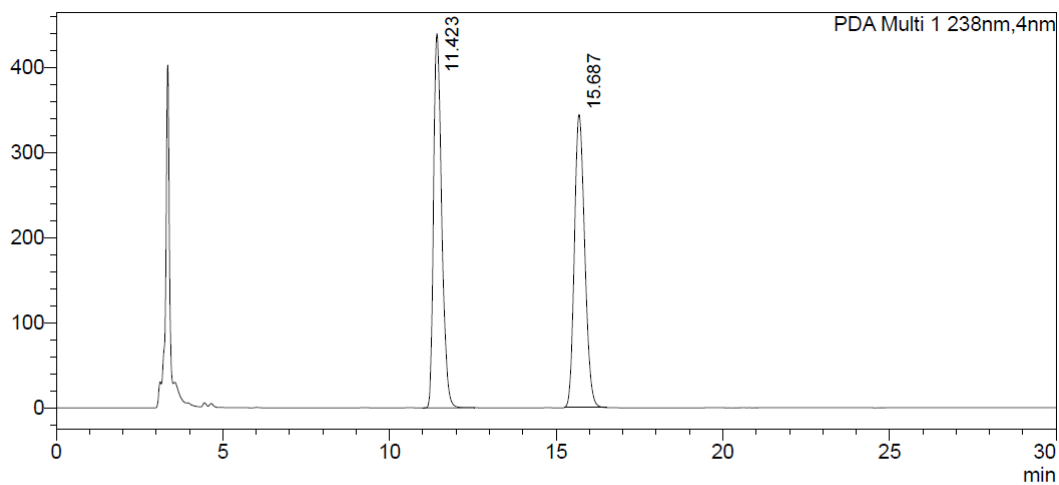

**<Peak Table>**

PDA Ch1 238nm

| Peak# | Ret. Time | Area     | Height | Area%   |
|-------|-----------|----------|--------|---------|
| 1     | 11.423    | 7437902  | 439562 | 50.081  |
| 2     | 15.687    | 7413777  | 344081 | 49.919  |
| Total |           | 14851679 | 783643 | 100.000 |

Scalemic with (S,S)-4e  
mAU

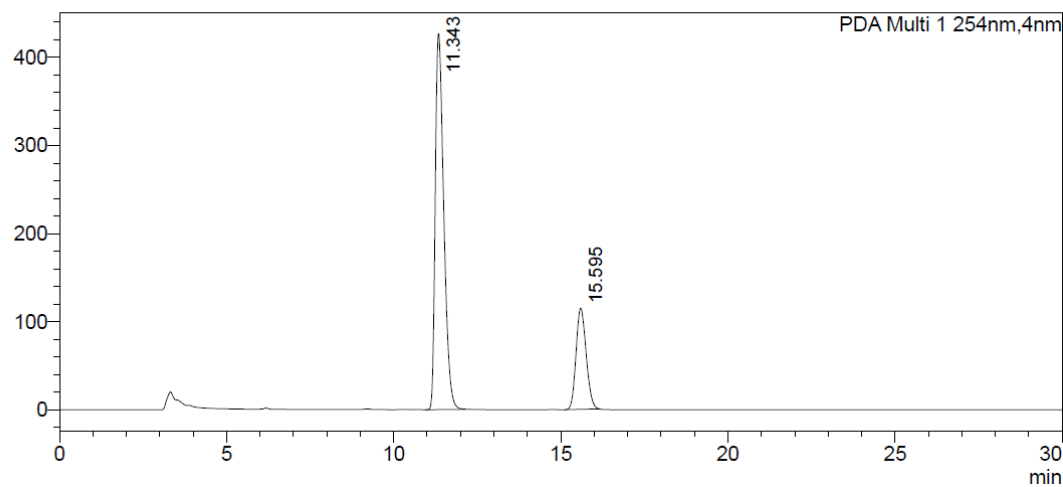

**<Peak Table>**

PDA Ch1 254nm

| Peak# | Ret. Time | Area    | Height | Area%   |
|-------|-----------|---------|--------|---------|
| 1     | 11.343    | 7544140 | 426518 | 75.717  |
| 2     | 15.595    | 2419525 | 114886 | 24.283  |
| Total |           | 9963666 | 541404 | 100.000 |

# Scalemic with (S,S)-4a

mAU

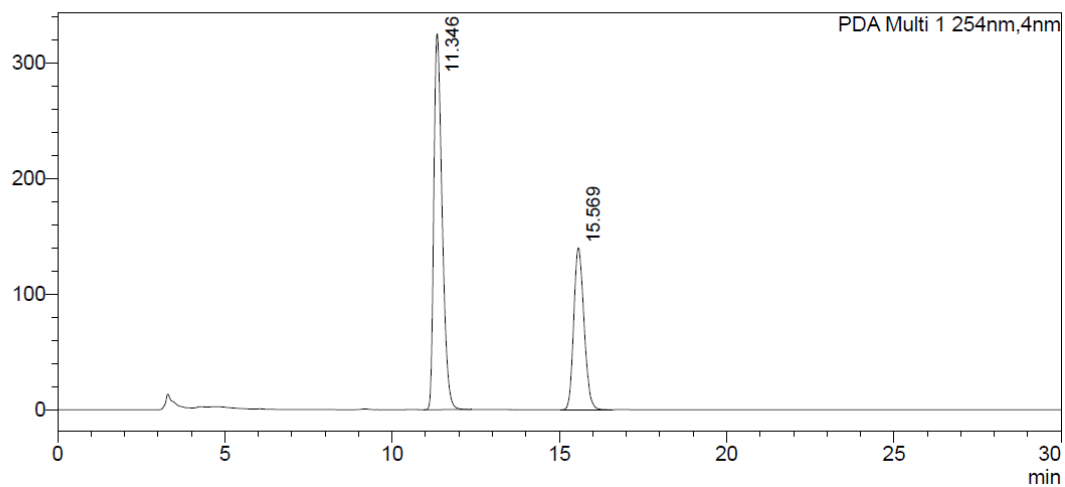

## <Peak Table>

PDA Ch1 254nm

| Peak# | Ret. Time | Area    | Height | Area%   |
|-------|-----------|---------|--------|---------|
| 1     | 11.346    | 5620685 | 324850 | 65.272  |
| 2     | 15.569    | 2990512 | 139886 | 34.728  |
| Total |           | 8611197 | 464736 | 100.000 |

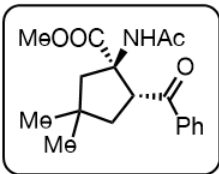

**((R,R)-3j)**

Racemic (contains two diastereomers in a ratio about 3:2)

mAU

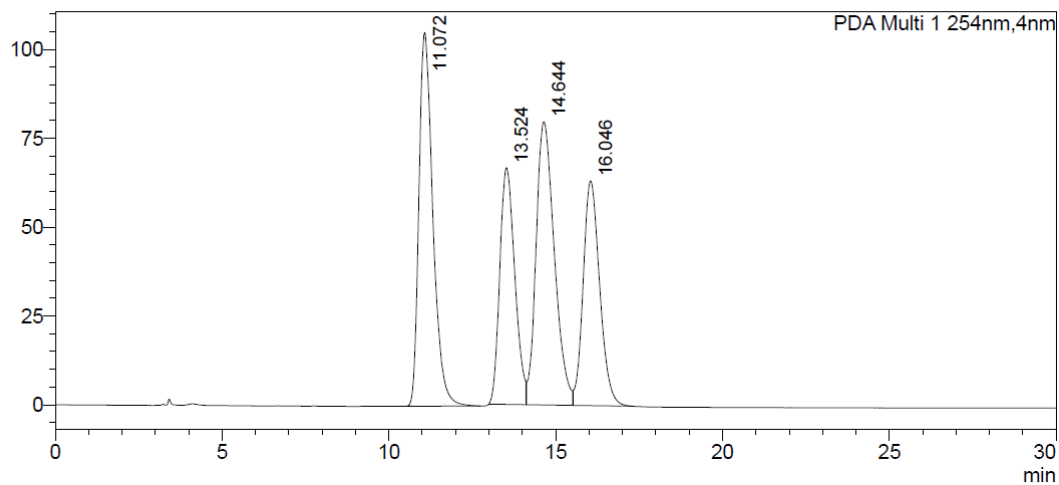

**<Peak Table>**

PDA Ch1 254nm

| Peak# | Ret. Time | Area     | Height | Area%   |
|-------|-----------|----------|--------|---------|
| 1     | 11.072    | 3064627  | 105167 | 29.524  |
| 2     | 13.524    | 2091581  | 66639  | 20.150  |
| 3     | 14.644    | 3039385  | 79707  | 29.280  |
| 4     | 16.046    | 2184666  | 63246  | 21.046  |
| Total |           | 10380258 | 314759 | 100.000 |

Scalemic with (S,S)-4e

mAU

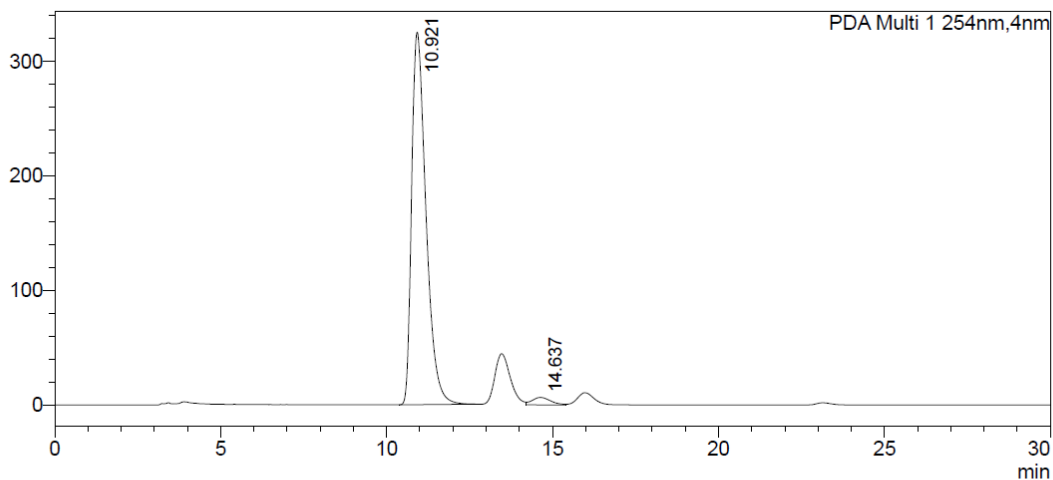

**<Peak Table>**

PDA Ch1 254nm

| Peak# | Ret. Time | Area     | Height | Area%   |
|-------|-----------|----------|--------|---------|
| 1     | 10.921    | 9768325  | 324941 | 97.486  |
| 2     | 14.637    | 251913   | 6543   | 2.514   |
| Total |           | 10020238 | 331485 | 100.000 |

# Scalemic with (S,S)-4a

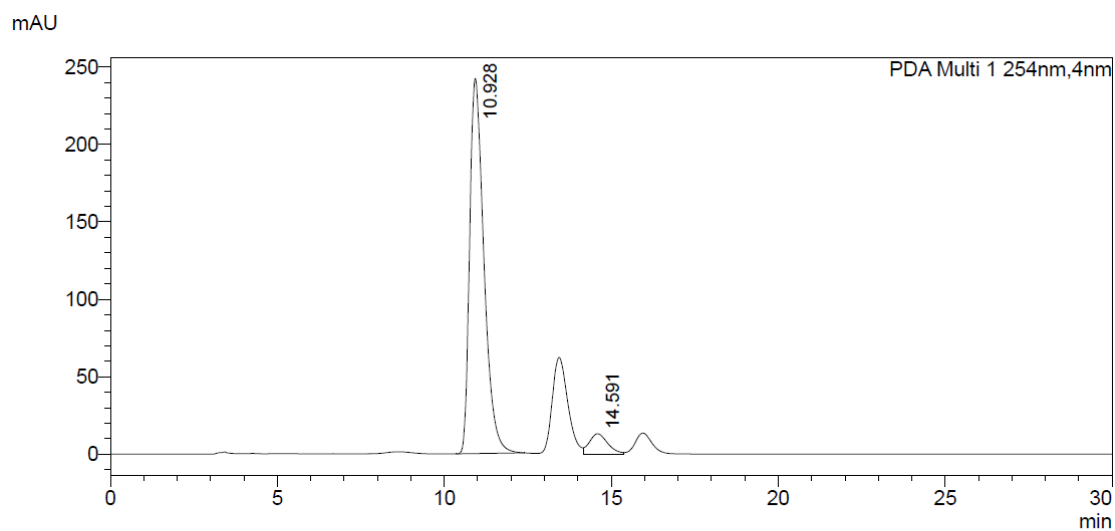

## <Peak Table>

PDA Ch1 254nm

| Peak# | Ret. Time | Area    | Height | Area%   |
|-------|-----------|---------|--------|---------|
| 1     | 10.928    | 7203933 | 242083 | 93.530  |
| 2     | 14.591    | 498361  | 13087  | 6.470   |
| Total |           | 7702294 | 255170 | 100.000 |

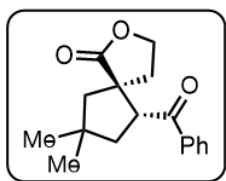

**((R,R)-3k)**

Racemic

mAU

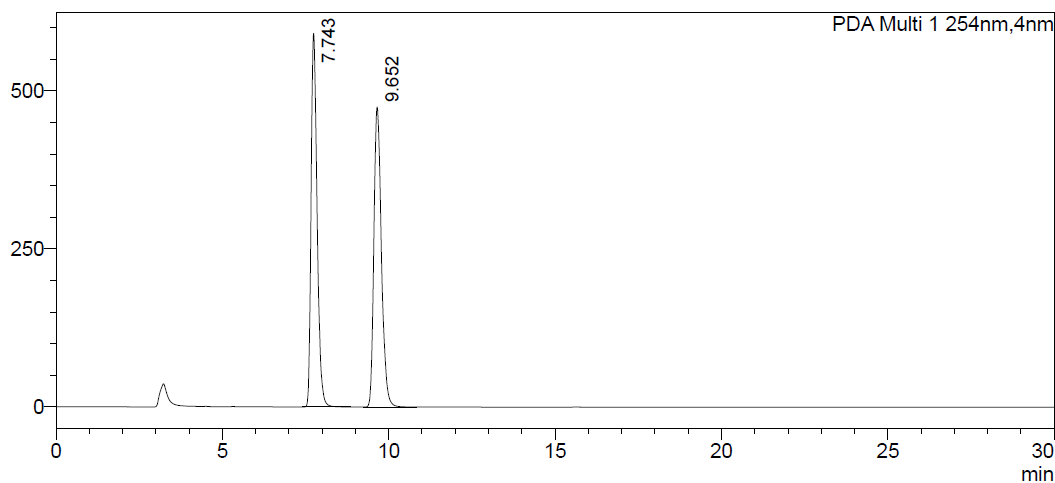

**<Peak Table>**

PDA Ch1 254nm

| Peak# | Ret. Time | Area     | Height  | Area%   |
|-------|-----------|----------|---------|---------|
| 1     | 7.743     | 7447217  | 591382  | 49.926  |
| 2     | 9.652     | 7469328  | 474998  | 50.074  |
| Total |           | 14916545 | 1066380 | 100.000 |

Scalemic with (*S,S*)-4e

mAU

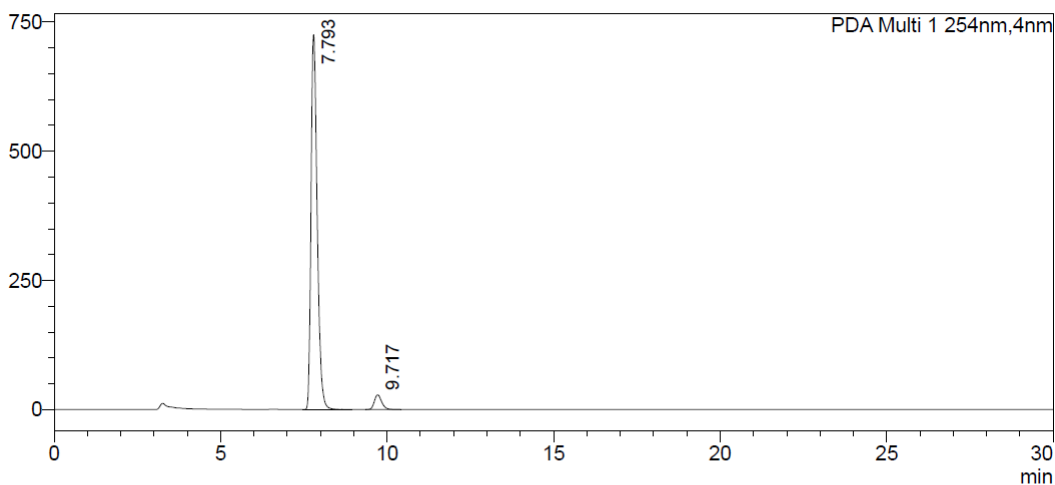

**<Peak Table>**

PDA Ch1 254nm

| Peak# | Ret. Time | Area    | Height | Area%   |
|-------|-----------|---------|--------|---------|
| 1     | 7.793     | 9331842 | 725655 | 95.516  |
| 2     | 9.717     | 438067  | 28461  | 4.484   |
| Total |           | 9769909 | 754116 | 100.000 |

# Scalemic with (S,S)-4a

mAU

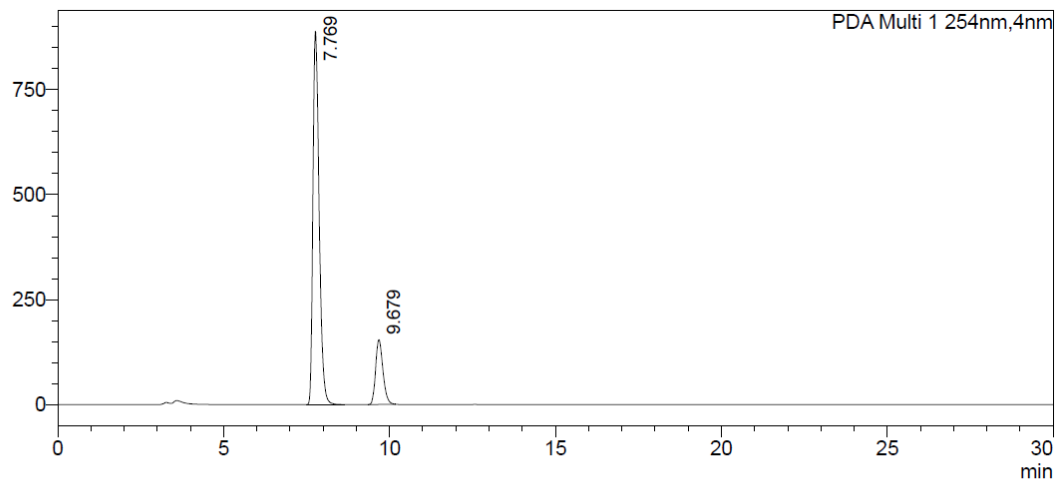

## <Peak Table>

PDA Ch1 254nm

| Peak# | Ret. Time | Area     | Height  | Area%   |
|-------|-----------|----------|---------|---------|
| 1     | 7.769     | 11574298 | 888782  | 83.037  |
| 2     | 9.679     | 2364373  | 154123  | 16.963  |
| Total |           | 13938670 | 1042905 | 100.000 |

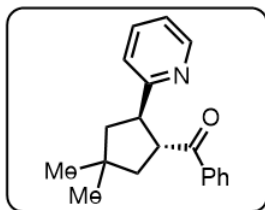

***((R,R)*-3l)**

Racemic  
mAU

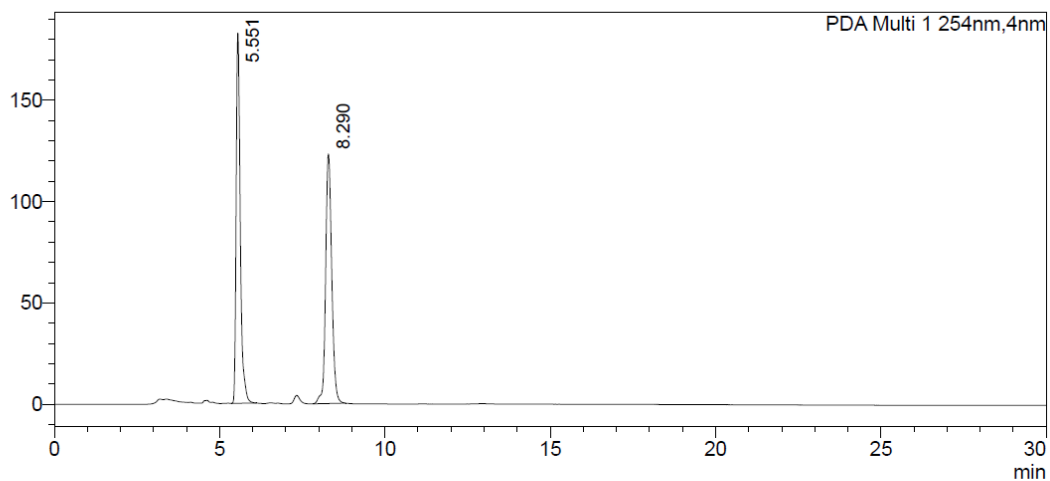

**<Peak Table>**

PDA Ch1 254nm

| Peak# | Ret. Time | Area    | Height | Area%   |
|-------|-----------|---------|--------|---------|
| 1     | 5.551     | 1588456 | 182544 | 50.037  |
| 2     | 8.290     | 1586081 | 123013 | 49.963  |
| Total |           | 3174537 | 305557 | 100.000 |

Scalemic with *(S,S)*-4e  
mAU

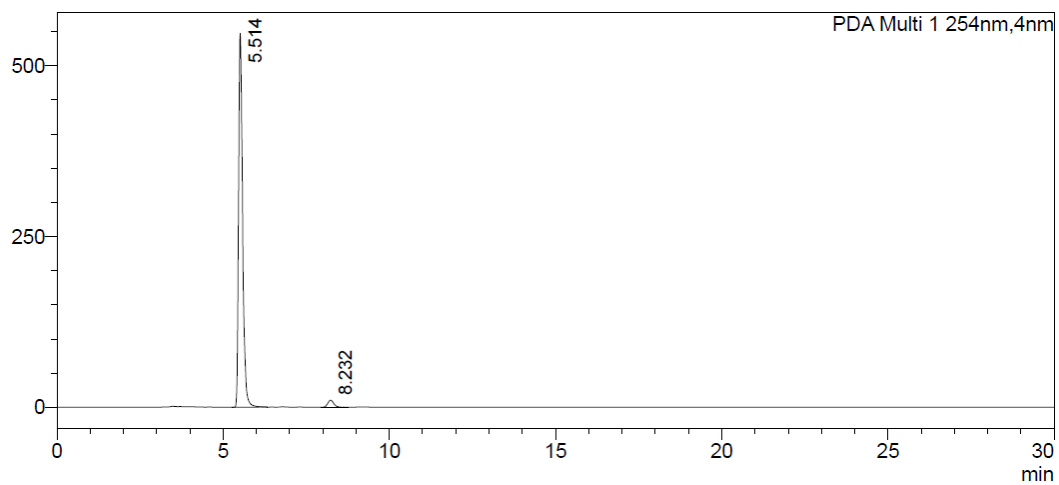

**<Peak Table>**

PDA Ch1 254nm

| Peak# | Ret. Time | Area    | Height | Area%   |
|-------|-----------|---------|--------|---------|
| 1     | 5.514     | 4625198 | 547306 | 97.312  |
| 2     | 8.232     | 127771  | 10331  | 2.688   |
| Total |           | 4752969 | 557636 | 100.000 |



# Scalemic with (S,S)-4a

mAU

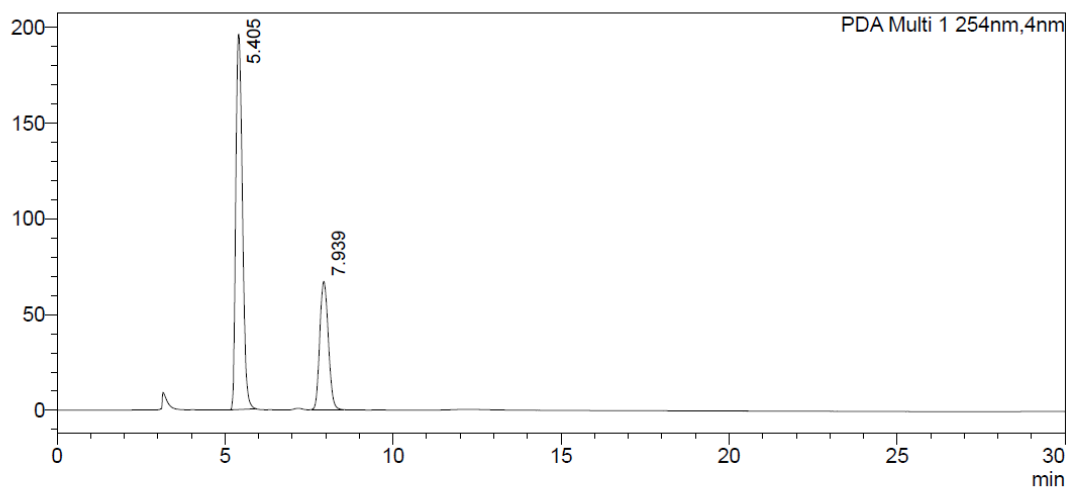

## <Peak Table>

PDA Ch1 254nm

| Peak# | Ret. Time | Area    | Height | Area%   |
|-------|-----------|---------|--------|---------|
| 1     | 5.405     | 2694035 | 196189 | 69.407  |
| 2     | 7.939     | 1187481 | 66963  | 30.593  |
| Total |           | 3881517 | 263151 | 100.000 |

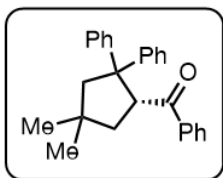

**((R,R)-3m)**

Racemic  
mAU

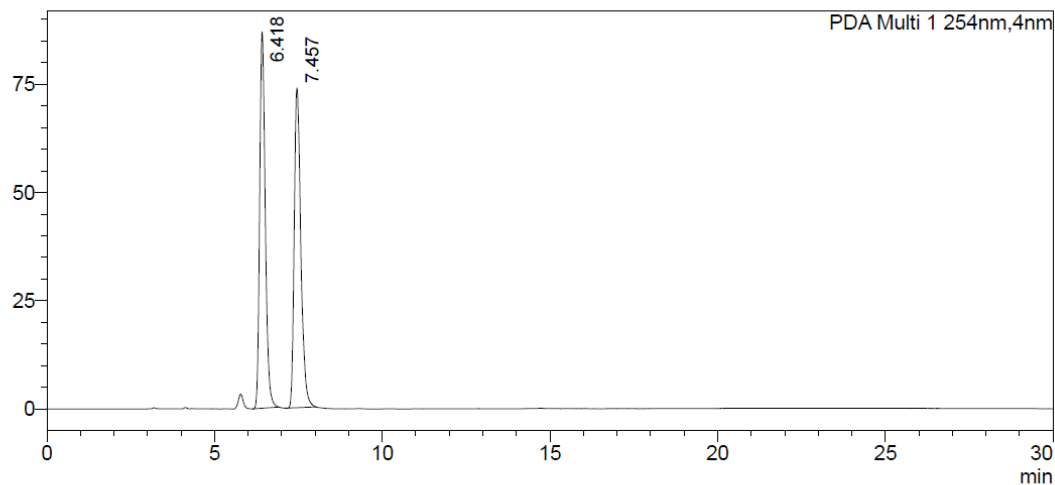

**<Peak Table>**

PDA Ch1 254nm

| Peak# | Ret. Time | Area    | Height | Area%   |
|-------|-----------|---------|--------|---------|
| 1     | 6.418     | 1014159 | 86903  | 50.130  |
| 2     | 7.457     | 1008912 | 73880  | 49.870  |
| Total |           | 2023071 | 160783 | 100.000 |

Scalemic with (S,S)-4e  
mAU

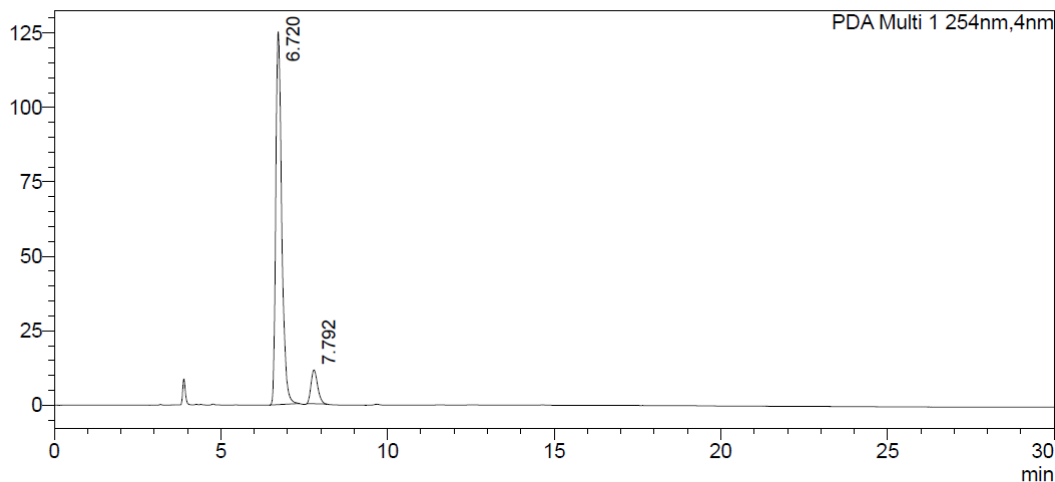

**<Peak Table>**

PDA Ch1 254nm

| Peak# | Ret. Time | Area    | Height | Area%   |
|-------|-----------|---------|--------|---------|
| 1     | 6.720     | 1556977 | 125253 | 90.901  |
| 2     | 7.792     | 155847  | 11296  | 9.099   |
| Total |           | 1712824 | 136548 | 100.000 |

# Scalemic with (S,S)-4a

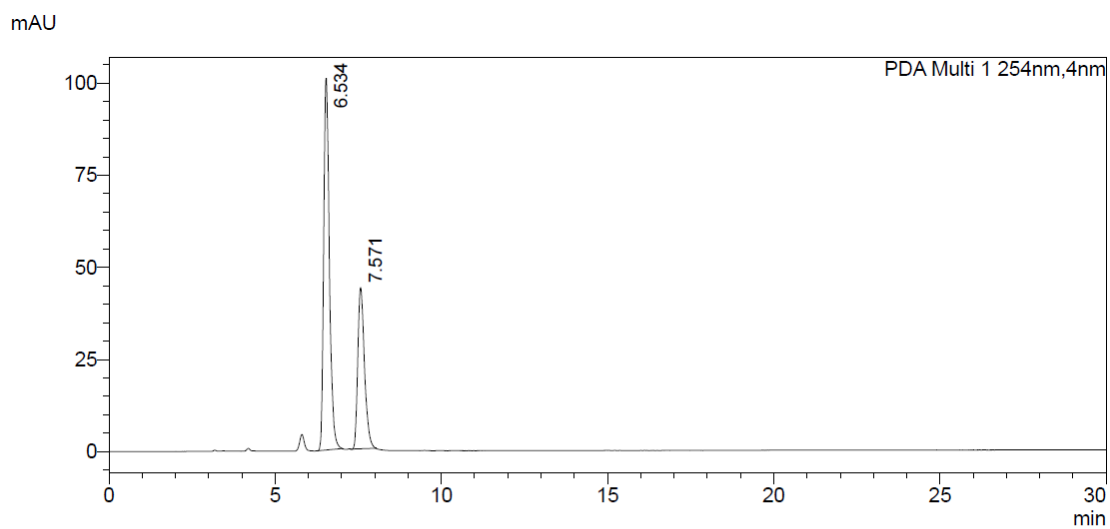

## <Peak Table>

PDA Ch1 254nm

| Peak# | Ret. Time | Area    | Height | Area%   |
|-------|-----------|---------|--------|---------|
| 1     | 6.534     | 1199551 | 100841 | 66.193  |
| 2     | 7.571     | 612640  | 43729  | 33.807  |
| Total |           | 1812191 | 144570 | 100.000 |
